# Supplementary material for: Sociodemographic predictors of early postnatal growth: evidence from a Chilean infancy cohort
Source: PubMed Central journal article supplement — BMJ Open. 2020 Jun 3;10(6):e033695. doi: 10.1136/bmjopen-2019-033695 (PMC7282289; doi:10.1136/bmjopen-2019-033695), 2020-06-03
Supplement: bmjopen-2019-033695.draft_revisions.pdf [file bmjopen-2019-033695.draft_revisions.pdf]

# BMJ Open

BMJ Open is committed to open peer review. As part of this commitment we make the peer review history of every article we publish publicly available.

When an article is published we post the peer reviewers' comments and the authors' responses online. We also post the versions of the paper that were used during peer review. These are the versions that the peer review comments apply to.

The versions of the paper that follow are the versions that were submitted during the peer review process. They are not the versions of record or the final published versions. They should not be cited or distributed as the published version of this manuscript.

BMJ Open is an open access journal and the full, final, typeset and author-corrected version of record of the manuscript is available on our site with no access controls, subscription charges or pay-per-view fees (<http://bmjopen.bmj.com>).

If you have any questions on BMJ Open's open peer review process please email [info.bmjopen@bmj.com](mailto:info.bmjopen@bmj.com)

# BMJ Open

## Sociodemographic predictors of early postnatal growth: evidence from a Chilean infancy cohort.

|                               |                                                                                                                                                                                                                                                                                                                                                                                                                                                                                                                                                                                                                                                                                                                                                                                                                                                                        |
|-------------------------------|------------------------------------------------------------------------------------------------------------------------------------------------------------------------------------------------------------------------------------------------------------------------------------------------------------------------------------------------------------------------------------------------------------------------------------------------------------------------------------------------------------------------------------------------------------------------------------------------------------------------------------------------------------------------------------------------------------------------------------------------------------------------------------------------------------------------------------------------------------------------|
| Journal:                      | <i>BMJ Open</i>                                                                                                                                                                                                                                                                                                                                                                                                                                                                                                                                                                                                                                                                                                                                                                                                                                                        |
| Manuscript ID                 | bmjopen-2019-033695                                                                                                                                                                                                                                                                                                                                                                                                                                                                                                                                                                                                                                                                                                                                                                                                                                                    |
| Article Type:                 | Research                                                                                                                                                                                                                                                                                                                                                                                                                                                                                                                                                                                                                                                                                                                                                                                                                                                               |
| Date Submitted by the Author: | 19-Aug-2019                                                                                                                                                                                                                                                                                                                                                                                                                                                                                                                                                                                                                                                                                                                                                                                                                                                            |
| Complete List of Authors:     | Von Holle, Ann; University of North Carolina at Chapel Hill, Epidemiology North, Kari; University of North Carolina at Chapel Hill<br>Gahagan, Sheila; University of California San Diego, Child Development and Community Health<br>Burrows, Raquel; University of Chile, Institute of Nutrition and Food Technology<br>Blanco, Estela; University of California San Diego, Child Development and Community Health<br>Lozoff, Betsy; University of Michigan, Department of Pediatrics<br>Howard, Annie Green; University of North Carolina System, Biostatistics<br>Justice, Anne; Geisinger Health, Center for Biomedical and Translational Informatics<br>Graff, Misa; University of North Carolina at Chapel Hill, Epidemiology<br>Voruganti, V. Saroja; University of North Carolina at Chapel Hill, Department of Nutrition and UNC Nutrition Research Institute |
| Keywords:                     | EPIDEMIOLOGY, Community child health < PAEDIATRICS, PUBLIC HEALTH                                                                                                                                                                                                                                                                                                                                                                                                                                                                                                                                                                                                                                                                                                                                                                                                      |
|                               |                                                                                                                                                                                                                                                                                                                                                                                                                                                                                                                                                                                                                                                                                                                                                                                                                                                                        |

SCHOLARONE™  
Manuscripts

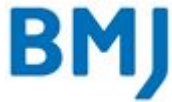

I, the Submitting Author has the right to grant and does grant on behalf of all authors of the Work (as defined in the below author licence), an exclusive licence and/or a non-exclusive licence for contributions from authors who are: i) UK Crown employees; ii) where BMJ has agreed a CC-BY licence shall apply, and/or iii) in accordance with the terms applicable for US Federal Government officers or employees acting as part of their official duties; on a worldwide, perpetual, irrevocable, royalty-free basis to BMJ Publishing Group Ltd ("BMJ") its licensees and where the relevant Journal is co-owned by BMJ to the co-owners of the Journal, to publish the Work in this journal and any other BMJ products and to exploit all rights, as set out in our [licence](#).

The Submitting Author accepts and understands that any supply made under these terms is made by BMJ to the Submitting Author unless you are acting as an employee on behalf of your employer or a postgraduate student of an affiliated institution which is paying any applicable article publishing charge ("APC") for Open Access articles. Where the Submitting Author wishes to make the Work available on an Open Access basis (and intends to pay the relevant APC), the terms of reuse of such Open Access shall be governed by a Creative Commons licence – details of these licences and which [Creative Commons](#) licence will apply to this Work are set out in our licence referred to above.

Other than as permitted in any relevant BMJ Author's Self Archiving Policies, I confirm this Work has not been accepted for publication elsewhere, is not being considered for publication elsewhere and does not duplicate material already published. I confirm all authors consent to publication of this Work and authorise the granting of this licence.

1  
2  
3  
4 Title: Sociodemographic predictors of early postnatal growth: evidence from a Chilean  
5 infancy cohort  
6  
7

8  
9 *Ann Von Holle*

10  
11 PO Box 12233 Mail Drop A3-03, 111 TW Alexander Drive, Research Triangle Park, NC 27709-2233.

12  
13 Email: [avonholle@gmail.com](mailto:avonholle@gmail.com); tel. 919-593-0299  
14

15 (Corresponding author)  
16  
17

18  
19 *Kari E. North*

20  
21 Department of Epidemiology, University of North Carolina, Chapel Hill, NC, United States  
22  
23

24  
25 *Sheila Gahagan*

26  
27 Child Development and Community Health Division, University of California, San Diego, CA, United  
28 States  
29  
30

31  
32 *Raquel Burrows*

33  
34 Institute of Nutrition and Food Technology, University of Chile, Santiago, Chile  
35  
36  
37  
38

39  
40 *Estela Blanco*

41  
42 Child Development and Community Health Division; University of California, San Diego, CA, United  
43 States  
44  
45

46  
47 *Betsy Lozoff*

48  
49 Department of Pediatrics, University of Michigan, Ann Arbor, MI, United States  
50  
51  
52

53  
54 *Annie Green Howard*  
55  
56  
57

1  
2  
3 Department of Biostatistics, University of North Carolina, Chapel Hill, NC, United States  
4  
5

6  
7 *Anne Justice*  
8

9 Center for Biomedical and Translational Informatics, Geisinger Health, Danville, PA, United States  
10  
11

12  
13 *Misa Graff*  
14

15 Department of Epidemiology, University of North Carolina, Chapel Hill, NC, United States  
16  
17

18  
19 *Venkata Saroja Voruganti*  
20

21 Department of Nutrition and UNC Nutrition Research Institute, University of North Carolina, Chapel  
22 Hill, NC, United States  
23  
24

Peer review only

Word Count: ~3,021

Number of references: 38

## Abstract

### Objectives

Infant anthropometric growth varies across socioeconomic factors, including maternal education and income, and may serve as an indicator of environmental influences in early life with long term health consequences. Previous research has identified sociodemographic gradients in growth with a focus on the first year and beyond, but estimates are sparse for growth before six months. Thus, our objective was to examine the relationship between early life environmental factors and infant growth patterns between birth and five months of age.

### Design

Prospective cohort study

### Settings

Low- to middle-income neighborhoods in Santiago, Chile (1991-1996).

### Participants

1,412 participants from a randomized iron deficiency anemia preventive trial in healthy infants.

### Main outcome measures

Longitudinal anthropometrics including monthly weight (kg), length (cm) and weight-for-length (WFL) values. For each measure, we estimated three individual-level growth parameters (size, timing, and velocity) from SuperImposition by Translation and Rotation (SITAR) models. Size and timing changes represent vertical and horizontal growth curve shifts, respectively, and velocity change represents growth rate shifts.

### Results

We used lasso regression with post-selection inference methods to estimate the linear association between each of the growth parameter outcomes and environmental exposures including gestational age, maternal age, education, and socioeconomic position (SEP). Lower SEP was associated with a slower linear (length) growth as demonstrated through the velocity growth parameter (-0.22, 95% CI=-0.13,-0.31) – outcome units are percent change in velocity from the average growth curve. Lower SEP was also associated with later WFL growth timing as demonstrated through the tempo growth parameter for females (0.25, 95% CI=0.05,0.42) – outcome units are shifts in days from the average growth curve.

## Conclusion

Previous research on growth in older infants and children shows associations between lower SEP with slower length velocity. We found evidence supporting this association in the first five months of life, which may inform age-specific prevention efforts aimed at infant growth.

## Strengths and Limitations of this Study

- The sample includes monthly anthropometric measures in first five postnatal months – not available in any study to date and allowing better fitting models of growth.
- We used a detailed measure of socioeconomic position specific to low- to middle-income groups, an understudied population.
- As the sample was low- to middle-income, these results may not generalize to groups with even lower or higher income or SEP.

## Introduction

Interest in early life infant growth has grown as evidence accumulates that it is associated with the development of adult disease, sometimes decades later. Some chronic disease outcomes associated with infant growth characteristics include obesity, endothelial dysfunction, and metabolic syndrome (1–3). Explanations for these associations include early infancy as a critical window of time for susceptibility to environmental exposures for chronic disease risk factors (4). Socioeconomic position (SEP) is one such exposure. SEP is associated with child growth patterns, in particular, length (5–12) and weight (13–16). In these studies, lower SEP is generally associated with faster weight gain during childhood, while the inverse holds true for length. These socioeconomic gradients in growth appear to emerge in early life (7) and persist (5).

Gaps remain in our understanding regarding sociodemographic predictors of growth during infancy and childhood. One such gap relates to the earliest period of infant growth. Studies to date include only a few observations before six months, leading to linear specifications between weight or height and time. However, curvilinear models of growth offer better model fit for early infancy growth. Growth during the first six months in the human lifespan is characterized by accelerated growth at the outset and leveling off at around six months (17). Understanding the relationship between early infant growth and sociodemographic factors may yield new information that highlight the potential for earlier interventions to promote optimal health.

Identifying novel associations in this age range can better pinpoint the timing and influence of sociodemographic factors. Given the sparsity of information in the literature focusing on these points, our aim in this study is to examine sociodemographic predictors of infant weight, length and weight-for-length (WFL) growth from zero to five months in an infancy cohort of over 1,400 healthy Chilean children. Based on observations of infants older than

1  
2  
3 six months, we expect that SEP will be inversely associated with weight gain and positively  
4 associated with length growth.  
5  
6

## 7 8 **Methods**

### 9 10 **Study sample**

11  
12 The data in this study are drawn from the Santiago Longitudinal Study (SLS), a cohort study  
13 from low- to middle-income neighborhoods in Santiago, Chile. Between 1991 and 1996,  
14 infants were recruited for an infancy iron deficiency anemia preventive trial (18) or  
15 neuromaturation study (19). Inclusion criteria for the infancy studies included term infants  
16 with birthweight  $\geq 3.0$  kg, vaginal birth, no major health problems for the infant, and, for  
17 the preventive trial, no iron deficiency anemia present at five to six months. Those with  
18 iron deficiency anemia and the next nonanemic control were invited to participate in the  
19 neuromaturation study and are not considered here. Participant eligibility and follow-up  
20 information have previously been reported (18). The Santiago Longitudinal Study (SLS)  
21 had been approved by Institutional Review Boards from 1) the University of Michigan, Ann  
22 Arbor, 2) Institute of Nutrition and Food Technology (INTA), Chile and 3) University of  
23 California, San Diego.  
24  
25  
26

27 We characterized the growth period prior to treatment randomization, which occurred at  
28 six months. Anthropometric measures prior to study enrollment were obtained from the  
29 medical chart. The total sample size included 1,657 infants who completed the preventive  
30 trial. The participants included in this analysis numbered 1,412 individuals from the  
31 preventive trial with anthropometric measures for at least two time points before six  
32 months.  
33  
34

### 35 **Outcome and sociodemographic measures**

36  
37 Anthropometric measurements included weight (kg), length (cm), and weight-for-length  
38 (WFL) (g/cm). Weight was measured to the nearest 0.01 kg on an electronic scale at local  
39 public health clinics. Length was measured on a recumbent board to the nearest 0.1 cm.  
40 Gestational age (GA), obtained from the medical chart, was among the set of variables  
41 included in the models as a covariate.  
42  
43

44 Sociodemographic measures were self-reported by the mother, including maternal age  
45 (years), total years of education, and the modified Graffar index (20), an index of SEP used  
46 in lower-income countries (21). The modified Graffar index represents a sum of 10  
47 measures regarding education, family composition, and housing characteristics, which are  
48 summed to create a scale with higher values indicating lower social class (Appendix Table  
49 A1). Mothers self-reported breastfeeding characteristics from birth, including date of first  
50 bottle and age at weaning if weaned. From this information, we created variables for  
51 breastfeeding as the sole source of milk and mixed breast and bottle feeding at five months.  
52  
53  
54  
55  
56  
57



## Statistical analyses

Summary statistics included median and interquartile ranges for continuous variables and percent with counts for categorical variables. All summary statistics were stratified by child sex.

We used two steps to assess the association between infant growth and sociodemographic predictors: 1) SuperImposition by Translation and Rotation (SITAR) approach (22) to estimate infant weight, length and weight-for-length (WFL) growth characteristics from birth to five months followed by 2) linear regression to estimate the relationship between sociodemographic predictors and these growth characteristics. We used a nonlinear mixed effects model (23) to estimate the growth characteristics with the R nlme package (24). Each model produces up to three different SITAR growth parameters per individual, which have been named 'size', 'tempo' and 'velocity' (22) (Figure 1). 'Size' indicates a shift of the growth curve up and down for an individual relative to the average growth curve. 'Tempo' indicates a shift of the growth curve to the left or right on the age scale for an individual relative to the average growth curve. Lastly, 'velocity' indicates a transformation of the age scale in the nonlinear model, shrinking or enlarging the age scale for an individual relative to the average growth curve. These three parameters are noted as having biologically meaningful interpretations, which are difficult to obtain with other growth models (23). Unless otherwise noted, any references to 'size', 'tempo', and 'velocity' refer to these parameters from the SITAR construct applied to early infant growth. We assessed best model fit for each anthropometric measure via the lowest Bayesian Information Criterion (BIC) for growth independent of any covariates. After evaluating all possible combinations of SITAR models from one to three parameters for each of the three anthropometric measures, best fit (Appendix Table A2) models included: 1) all three growth parameters for weight (BIC=-22941), 2) sex-specific growth trajectories with tempo and velocity parameters for length (BIC=-38001), and 3) sex-specific growth trajectories with size and tempo parameters for WFL (BIC=-22809).

[Figure 1 about here](#)

The results from the second step analyses are reported. In addition to analyses combining and adjusting for sex of the child, sex-stratified analyses were used for all three anthropometric outcomes, as some estimated associations between the SITAR growth parameters and SEP indicators differed by sex of the child.

The adjusted models in the second step started with four covariates: gestational age, maternal age, maternal total years of education, and Graffar index (20). We removed covariates from the model based on the least absolute shrinkage and selection operator (lasso) approach (25). This approach has better performance than conventional model selection methods with a univariate approach (26) such as stepwise methods (27). The lasso approach assists in selecting predictors with the strongest coefficients (28) while balancing bias and variation in the model. We used the glmnet package in R (29) to estimate shrunken parameters and the selectiveInference package (30) to provide inference via statistical tests and confidence intervals. Each set of comparisons by outcome, i.e. weight, length or weight-for-length were considered separately, controlling multiple

1  
2  
3 comparisons with a Bonferroni correction at an alpha level of 0.05. A coefficient for the  
4 predictor of a weight size growth parameter outcome in the second step indicates a change  
5 in log(kg) for a one-unit change in the predictor; we multiply this coefficient by 100 to  
6 make a symmetric percentage difference on a modified percentage scale (31). Similarly, a  
7 one-unit change in the predictor corresponds to a symmetric percentage change in the  
8 velocity growth parameter. Time (days) is not log transformed and the coefficient for this  
9 outcome corresponds to a shift in the time scale in days.  
10  
11

12 For analyses, we used a complete case data set, i.e., all participants with non-missing  
13 covariates. The proportion of missing data was less than one percent for all variables  
14 except the Graffar index, which had less than three percent missing. The median number of  
15 non-missing outcome (anthropometric) values was six out of six monthly measures (birth  
16 to five months). The percent of missing outcome values at each time point ranged from 9%  
17 at months 1 and 2 to 0.2% at birth. In a post hoc data analysis we used logistic regression  
18 models to estimate associations between SEP (the Graffar Index) as a continuous variable,  
19 and binary breastfeeding status outcomes – any or exclusive – at five months.  
20  
21

## 22 Patient and public involvement

23  
24 Participants were mothers and infants recruited for research. The mothers were not  
25 involved in setting the study design, research questions or outcome measures for this  
26 study.  
27  
28

## 29 Results

30  
31 Participants (n=1,412) were 53% male and 47% female. Median gestational age (Q1, Q3)  
32 was 40 weeks (39, 40); preterm infants (< 37 weeks GA) were excluded by design. Mothers  
33 were 26 years of age (median (IQR) 26 (22,31) and had a median (IQR) of 10 (8,12) years  
34 of education at the time of their infant's birth (Table 1). For the six monthly  
35 anthropometric measurements, each infant had at least two observations, and 72% had  
36 measures at all six time points.  
37  
38  
39

40 Put table 1 about here

41  
42 The following sections show results of the growth trajectory analyses for the three  
43 anthropometric outcomes: weight (kg), length (cm) and weight-for-length (WFL) (g/cm).  
44 All p-values are adjusted for multiple comparisons.  
45  
46

### 47 Weight trajectories: size, tempo and velocity

48 All three SITAR parameters, i.e. 'size, 'tempo' and 'velocity', best satisfied model fit  
49 diagnostic tests for weight trajectories (Appendix Table A2). Maternal age was positively  
50 associated with the weight size parameter for female infants (0.21, 95% CI = 0.07, 0.34) in  
51 the unadjusted model (Table 2), with a 0.21 percentage difference from the average growth  
52 curve for each year increase in maternal age. Maternal age was inversely associated with  
53 weight velocity parameter in female infants (-0.41, 95% CI = -0.71, -0.12) in the unadjusted  
54 model, indicating that higher maternal age was associated with slower weight growth.  
55  
56  
57

Gestational age in the pooled sample was significantly associated with the weight tempo parameter (-2.01, 95% CI = -2.98, -1.70) in the adjusted model, indicating a leftward shift of about two days for each additional week in gestational age. This indicates earlier timing of weight gain in infants who were born with higher gestational age (Table 2). There was no substantive difference in this association in the sex-stratified analyses.

[put table 2 about here](#)

### **Length trajectories: tempo and velocity**

For length (linear) growth, the 'tempo' and 'velocity' SITAR growth parameters best satisfied model fit diagnostic tests (Appendix Table A2). In the pooled group, the coefficient of association between the Graffar index and the velocity parameter (-0.22, 95% CI = -0.13, -0.31) (Table 3) indicated that for each unit increase in the Graffar index, there was a -0.22 percent difference from the average length velocity. This reflects a positive relationship between the length velocity parameter and SEP. This positive association was not substantively different in the sex-stratified analyses, all of which indicated faster linear (length) growth with higher SEP. In contrast to the sex-stratified analyses, all covariates remained in the pooled adjusted model with less than 6% decline from the unadjusted SEP coefficient (-0.23, 95% CI = -0.31, -0.15).

Gestational (GA) age was inversely associated with the length tempo parameter in the pooled sample (-2.94, 95% CI = -3.51, -2.41), indicating a leftward shift of about three days of the trajectory on the time scale, and a faster start to length growth, for each one week increase in gestational age (Table 3). GA was also associated with the length velocity parameter for the pooled sample (0.61, 95% CI = 0.06, 1.15).

[put Table 3 about here](#)

### **Weight-for-length trajectories: size and tempo**

For WFL growth, the 'size' and 'tempo' SITAR parameters best satisfied model fit diagnostic tests (Appendix Table A2). Lower SEP was positively associated with the WFL tempo parameter for females (0.25, 95% CI = 0.05, 0.42) in the adjusted model. This estimate approximates a rightward shift in time (days) relative to the average growth curve indicating later growth timing with lower SEP.

Similar to weight and length trajectories, GA was inversely associated with the WFL tempo parameter in the pooled sample (-1.99, 95% CI = -2.83, -1.49) (Table 4) indicating about a two-day shift to the left on the time scale from the average growth curve for every one week increase in gestational age. Similar values were found in the sex-stratified analyses, all indicating earlier timing of WFL growth with higher gestational age.

[put Table 4 about here](#)

The post hoc analysis examining the association between odds of exclusive or any breastfeeding at five months and the continuous SEP measure (the Graffar index) did not find a substantive or significant association (data not shown).

## Discussion

In this research, we found that lower SEP, measured by the Graffar index, was inversely associated with length growth characteristics in the first six months. Lower SEP was associated with later timing of WFL growth as reflected by the positive association between the Graffar Index and the WFL tempo parameter. These higher tempo values translate to a rightward shift in growth relative to the average growth curve as well as a later age at peak velocity (32). This delay in growth can be considered an unfavorable outcome associated with lower SEP.

Of three previous studies investigating associations between sociodemographic predictors and infant growth before six months, two found a positive association between length (linear) growth and maternal education (8,10), used as a proxy for SEP. Only one study found an inverse association with length growth (12). Many studies including age ranges exceeding six months of age up to five years of age demonstrated a positive association between maternal education and length/height growth (7,8,10). The majority of these studies support the conclusion that lower SEP is associated with slower length/height (linear) growth in infancy and early childhood.

Several prior studies representing high-income European countries have noted that their findings of either an inverse (12) or no relationship (7) between SEP and length (linear) growth may not generalize to low- to middle-income countries. Deviations from the Western diet and lifestyle were one of the reasons given for this limitation. Chile, the country from which our data were collected, offers an interesting context in this respect. The recruitment period for this study, 1991 to 1996, occurred as Chile was transitioning from a low-income to an upper-middle income country. In 1990, 40% of the Chilean population was below the poverty line (33); by 2012 Chile was classified by WHO as an upper middle-income country (34). There were nutrition and epidemiologic transitions (35,36) beginning in the 1970s and continuing during the 1990s when study infants were enrolled. Specifically, consumption of high-calorie food, accompanied by a sedentary lifestyle, resulted in rising obesity prevalence across all socioeconomic levels. In the context of an emerging Western diet and lifestyle, we found that lower SEP was associated with poorer length (linear) growth in early infancy. Of course, contemporary generations in Chile experience deteriorated SEP in a new context of over-nutrition and higher levels of sedentary behavior. Thus current studies in Chile may find distinct relationships between SEP and early growth when compared with generations born 20 years ago.

Plausible biological mechanisms, linked to modifiable factors, have been proposed for the observed association between lower SEP and length growth in the first five postnatal months. Breastfeeding and maternal smoking are two commonly proposed mechanisms, although evidence is limited. In our sample, breastfeeding was close to universal (37,38) and not associated with infant weight change in the first year. For maternal smoking status, prior studies did not find that either prenatal or postnatal smoking substantially altered the association between SEP and growth (11,12,16).

Maternal age was the only sociodemographic predictor positively associated with the SITAR size growth parameter for weight. This was similarly reported in another cohort

1  
2  
3 from the same geographic area of Santiago, Chile, the Growth and Obesity Cohort Study  
4 (GOCS) (13), which started a decade later and studied ages between birth and 2 years. Our  
5 findings add to this previous work. Through our intense focus on the first five prenatal  
6 months, our results demonstrate that the association between SEP and weight growth  
7 appears earlier in the postnatal period than previously documented.  
8

9  
10 Other potential mechanisms operating through SEP could include gestational weight gain  
11 and maternal nutrient status. Size at birth, considered a proxy for these two factors and  
12 represented in these analyses by the size SITAR parameter, was not associated with any of  
13 the sociodemographic measures. Further research will be useful in clarifying the biological  
14 mechanisms behind the association between SEP and early infant growth.  
15

16  
17 Strengths of this study include the combination of an analytic approach to growth that  
18 better captures the nonlinear characteristic of growth in the first five months of life with a  
19 detailed measure of socioeconomic position appropriate to the context of a lower income  
20 setting. Another strength is the monthly anthropometric measures collected in the first five  
21 postnatal months. We also note several limitations. The sample size is smaller than other  
22 studies with sample sizes in the thousands or tens of thousands (5,13,14). Our study was  
23 therefore not powered to detect some effects reported in larger studies. Another limitation  
24 is that the Graffar index, developed to assess differences in low- to middle-income  
25 populations, limits the generalizability of our findings to higher income groups.  
26

27  
28 This investigation examined various growth characteristics from birth to five months and  
29 their association with sociodemographic factors in a Chilean infancy cohort. We found  
30 associations between lower SEP and slower length (linear) growth, which are similar in  
31 direction to previous findings for maternal education that span periods of time greater  
32 than the first six months and up to five years of age (7,8,10,12). The association between  
33 maternal age and weight size, in our study, was similar to findings in other studies of  
34 growth between birth and two years of age (13). In sum, our results extend findings from  
35 previous research by showing that sociodemographic factors affect infant growth even in  
36 the first five months of growth and in relatively homogenous low- to middle-income  
37 populations.  
38  
39

## 40 41 42 **Acknowledgements**

43  
44 We thank the Santiago Longitudinal Study participants.  
45

## 46 47 **Contributors**

48  
49 AVH designed the study, conducted the data analysis, and wrote the first draft of the paper.  
50 KEN and SG supervised and contributed to the study design and interpretation of results.  
51 EB helped acquire the data. All authors both contributed to revisions of the draft for  
52 intellectual content and approved the final version of the manuscript.  
53  
54  
55  
56  
57

## Funding

AVH was supported by an American Heart Association Mid-Atlantic Affiliate predoctoral fellowship (award number 16PRE29200008). KEN was supported by AHA grant 15GRNT25880008. The data for this work was supported by grants from the National Institutes of Health R01-HL-088530 and R01-HD-033487

## Competing interests

None declared.

## Patient consent

Not required.

## Ethics approval

The Santiago Longitudinal Study (SLS) had been approved by Institutional Review Boards from 1) University of Michigan Medical Center, Ann Arbor, 2) Institute of Nutrition and Food Technology (INTA), Chile and 3) University of California, San Diego. The Office of Human Research Ethics at the University of North Carolina, Chapel Hill exempted this current research using existing anonymous data from review under the 45 CFR 46.101(b) regulatory category.

## Data sharing agreement

No additional data are available.

## Disclaimer

AHA had no role in the study design, data collection, and analysis, decision to publish or preparation of the manuscript.

## References

1. Gillman MW. The first months of life: A critical period for development of obesity. *Am J Clin Nutr*. 2008 Jun;87(6):1587–9.
2. Leunissen RWJ. Timing and tempo of first-year rapid growth in relation to cardiovascular and metabolic risk profile in early adulthood. *JAMA*. 2009 Jun 3;301(21):2234.

- 1  
2  
3 3. Touwslager RN, Houben AJ, Tan FE, Gielen M, Zeegers MP, Stehouwer CD, et al. Growth  
4 and endothelial function in the first 2 years of life. *The Journal of Pediatrics*. 2015  
5 Mar;166(3):666–671.e1.  
6
- 7 4. Plagemann A, Harder T, Schellong K, Schulz S, Stupin JH. Early postnatal life as a critical  
8 time window for determination of long-term metabolic health. *Best Practice & Research*  
9 *Clinical Endocrinology & Metabolism*. 2012 Oct;26(5):641–53.  
10
- 11 5. McCrory C, O’Leary N, Fraga S, Ribeiro AI, Barros H, Kartiosuo N, et al. Socioeconomic  
12 differences in children’s growth trajectories from infancy to early adulthood: Evidence  
13 from four european countries. *Journal of Epidemiology and Community Health*. 2017  
14 Oct;71(10):981–9.  
15
- 16 6. Murasko JE. Associations between household income, height and BMI in contemporary  
17 US children: Infancy through early childhood. *Annals of Human Biology*. 2014  
18 Nov;41(6):488–96.  
19
- 20 7. Howe LD, Tilling K, Galobardes B, Smith GD, Gunnell D, Lawlor DA. Socioeconomic  
21 differences in childhood growth trajectories: At what age do height inequalities emerge?  
22 *Journal of Epidemiology and Community Health*. 2012 Feb;66(2):143–8.  
23
- 24 8. Patel R, Tilling K, Lawlor DA, Howe LD, Bogdanovich N, Matush L, et al. Socioeconomic  
25 differences in childhood length/height trajectories in a middle-income country: A cohort  
26 study. *BMC public health*. 2014;14(1):932.  
27
- 28 9. Queiroz VA de O, Assis AMO, Pinheiro SMC, Junior H da CR. Predictors of linear growth in  
29 the first year of life of a prospective cohort of full term children with normal birth weight.  
30 *Jornal de Pediatria*. 2012 Feb 15;88(1):79–86.  
31
- 32 10. Matijasevich A, Howe LD, Tilling K, Santos IS, Barros AJD, Lawlor DA. Maternal  
33 education inequalities in height growth rates in early childhood: 2004 pelotas birth cohort  
34 study: Inequalities in childhood height. *Paediatric and Perinatal Epidemiology*. 2012  
35 May;26(3):236–49.  
36
- 37 11. Herngreen W, Buuren S van, Wieringen J van, Reerink J, Verloove-Vanhorick S, Ruys J.  
38 Growth in length and weight from birth to 2 years of a representative sample of  
39 netherlands children (born in 1988–89) related to socioeconomic status and other  
40 background characteristics. *Annals of Human Biology*. 1994 Jan;21(5):449–63.  
41
- 42 12. Silva LM, Rossem L van, Jansen PW, Hokken-Koelega ACS, Moll HA, Hofman A, et al.  
43 Children of low socioeconomic status show accelerated linear growth in early childhood;  
44 results from the generation r study. Wang G, editor. *PLoS ONE*. 2012 May 23;7(5):e37356.  
45
- 46 13. Pizzi C, Cole TJ, Richiardi L, dos-Santos-Silva I, Corvalan C, De Stavola B. Prenatal  
47 influences on size, velocity and tempo of infant growth: Findings from three contemporary  
48 cohorts. Wang G, editor. *PLoS ONE*. 2014 Feb 27;9(2):e90291.  
49
- 50 14. Hui L, Leung GM, Cowling BJ, Lam T, Schooling CM. Determinants of infant growth:  
51 Evidence from hong kong’s “children of 1997” birth cohort. *Annals of Epidemiology*. 2010  
52 Nov;20(11):827–35.  
53

15. Fuemmeler BF, Wang L, Iversen ES, Maguire R, Murphy SK, Hoyo C. Association between prepregnancy body mass index and gestational weight gain with size, tempo, and velocity of infant growth: Analysis of the newborn epigenetic study cohort. *Childhood Obesity*. 2016 Jun;12(3):210–8.
16. Wijlaars LPMM, Johnson L, Jaarsveld CHM van, Wardle J. Socioeconomic status and weight gain in early infancy. *International Journal of Obesity*. 2011 Jul;35(7):963–70.
17. Lejarraga H. Growth in infancy and childhood. In: *Human growth and development*. Elsevier; 2012. pp. 23–56.
18. Lozoff B, De Andraca I, Castillo M, Smith JB, Walter T, Pino P. Behavioral and developmental effects of preventing iron-deficiency anemia in healthy full-term infants. *Pediatrics*. 2003 Oct;112(4):846–54.
19. Lozoff B, Kaciroti N, Walter T. Iron deficiency in infancy: Applying a physiologic framework for prediction. *The American journal of clinical nutrition*. 2006;84(6):1412–21.
20. Graffar M. Une methode de classification sociales d'echantillons de population. *Courrier*. 1956;6:445–59.
21. Alvarez ML, Muzzo S, Ivanović D. Scale for measurement of socioeconomic level, in the health area. *Rev Med Chil*. 1985 Mar;113(3):243–9.
22. Cole TJ, Donaldson MDC, Ben-Shlomo Y. SITAR – a useful instrument for growth curve analysis. *International Journal of Epidemiology*. 2010 Jul 20;39(6):1558–66.
23. Beath KJ. Infant growth modelling using a shape invariant model with random effects. *Statistics in Medicine*. 2007 May 30;26(12):2547–64.
24. Pinheiro J, Bates D, DebRoy S, Sarkar D, R Core Team. *Nlme: Linear and nonlinear mixed effects models* [Internet]. 2017.
25. Tibshirani R. Regression shrinkage and selection via the lasso: A retrospective. *Journal of the Royal Statistical Society: Series B (Statistical Methodology)*. 2011 Jun 1;73(3):273–82.
26. Greenland S. Invited commentary: Variable selection versus shrinkage in the control of multiple confounders. *American Journal of Epidemiology*. 2007 Dec 12;167(5):523–9.
27. Harrell FE. *Regression modeling strategies: With applications to linear models, logistic and ordinal regression, and survival analysis* [Internet]. 2015.
28. Hastie T, Tibshirani R, Friedman JH. *The elements of statistical learning: Data mining, inference, and prediction*. Second edition, corrected at 12th printing 2017. New York: Springer; 2017. 745 pp. (Springer series in statistics).
29. Friedman J, Hastie T, Tibshirani R. Regularization paths for generalized linear models via coordinate descent. *Journal of Statistical Software*. 2010;33(1):1–22.



- 1  
2  
3 30. Tibshirani R, Tibshirani R, Taylor J, Loftus J, Reid S. selectiveInference: Tools for post-  
4 selection inference [Internet]. 2017.  
5  
6 31. Cole TJ, Altman DG. Statistics notes: Percentage differences, symmetry, and natural  
7 logarithms. *BMJ*. 2017 Aug 16;j3683.  
8  
9 32. Cole T, Kuh D, Johnson W, Ward K, Howe L, Adams J, et al. Using super-imposition by  
10 translation and rotation (SITAR) to relate pubertal growth to bone health in later life: The  
11 medical research council (MRC) national survey of health and development. *International*  
12 *Journal of Epidemiology*. 2016 Jul 27;dyw134.  
13  
14 33. Jimenez J, Romero MI. Reducing infant mortality in chile: Success in two phases. *Health*  
15 *Affairs*. 2007 Mar 1;26(2):458–65.  
16  
17 34. Gitlin LN, Fuentes P. The republic of chile: An upper middle-income country at the  
18 crossroads of economic development and aging. *The Gerontologist*. 2012 Jun 1;52(3):297–  
19 305.  
20  
21 35. Albala C, Vio F, Kain J, Uauy R. Nutrition transition in latin america: The case of chile.  
22 *Nutr Rev*. 2001 Jun;59(6):170–6.  
23  
24 36. Albala C, Vio F, Kain J, Uauy R. Nutrition transition in chile: Determinants and  
25 consequences. *Public Health Nutrition*. 2002 Feb;5(1).  
26  
27 37. Kang Sim DE, Cappiello M, Castillo M, Lozoff B, Martinez S, Blanco E, et al. Postnatal  
28 growth patterns in a chilean cohort: The role of SES and family environment. *International*  
29 *Journal of Pediatrics*. 2012;2012:1–8.  
30  
31 38. Khuc K, Blanco E, Burrows R, Reyes M, Castillo M, Lozoff B, et al. Adolescent metabolic  
32 syndrome risk is increased with higher infancy weight gain and decreased with longer  
33 breast feeding. *International Journal of Pediatrics*. 2012;2012:1–6.  
34  
35  
36  
37  
38  
39  
40  
41  
42  
43  
44  
45  
46  
47  
48  
49  
50  
51  
52  
53  
54  
55  
56  
57  
58  
59  
60

Table 1. Descriptive statistics of sociodemographic characteristics, median [IQR]

| Characteristic             | Male              | Female            | Total             |
|----------------------------|-------------------|-------------------|-------------------|
| n                          | 747               | 665               | 1412              |
| Gestational age (weeks)    | 40.0 [39.0, 40.0] | 40.0 [39.0, 40.0] | 40.0 [39.0, 40.0] |
| Graffar Index              | 27.0 [23.0, 33.0] | 27.0 [23.0, 33.0] | 27.0 [23.0, 33.0] |
| Maternal age (years)       | 26.0 [21.8, 30.9] | 25.5 [21.7, 30.3] | 25.8 [21.8, 30.8] |
| Maternal Education (years) | 10.0 [8.0, 12.0]  | 10.0 [8.0, 12.0]  | 10.0 [8.0, 12.0]  |

view only

Table 2. Sociodemographic predictors and association with weight SITAR growth parameters<sup>a,b</sup>, stratified by sex of Longitudinal Study, 1991-1996

| Characteristic             | Males                       |                             |                     |                        |                             |                     | Females                                      |                             |                             |                             |                             |                     |                                              |                             |
|----------------------------|-----------------------------|-----------------------------|---------------------|------------------------|-----------------------------|---------------------|----------------------------------------------|-----------------------------|-----------------------------|-----------------------------|-----------------------------|---------------------|----------------------------------------------|-----------------------------|
|                            | Unadjusted                  |                             |                     | Adjusted <sup>c</sup>  |                             |                     | Unadjusted                                   |                             |                             | Adjusted <sup>c</sup>       |                             |                     | Unadjusted                                   |                             |
|                            | Size                        | Tempo                       | Velocity            | Size                   | Tempo                       | Velocity            | Size                                         | Tempo                       | Velocity                    | Size                        | Tempo                       | Velocity            | Size                                         | Tempo                       |
| Gest age                   | 0.59<br>(-0.12, 0.12, 1.31) | <b>-2.28</b> (-3.15, -1.41) | -0.81 (-2.28, 0.66) | NA                     | <b>-1.96</b> (-3.15, -1.40) | NA                  | 0.76<br>(-0.02, 0.02, 1.54)                  | <b>-2.38</b> (-3.32, -1.45) | -2.14 (-3.87, -0.42)        | 0.45<br>(-0.32, 0.32, 9.88) | <b>-2.23</b> (-3.35, -1.47) | -1.58 (-3.85, 0.08) | 0.64<br>(0.10, 1.18)                         | <b>-2.35</b> (-2.98, -1.71) |
| Maternal age               | 0.11<br>(-0.00, 0.00, 0.23) | -0.06 (-0.20, 0.09)         | -0.07 (-0.31, 0.17) | 0.07<br>(-0.11, 0.21)  | -0.06 (-0.21, 0.26)         | -0.06 (-0.33, 0.82) | <b>0.21</b><br>( <b>0.07</b> , <b>0.34</b> ) | -0.02 (-0.18, 0.15)         | <b>-0.41</b> (-0.71, -0.12) | 0.19<br>(-0.13, 0.13, 0.22) | 0.01 (-2.29, 0.13)          | -0.36 (-0.67, 0.04) | <b>0.16</b><br>( <b>0.07</b> , <b>0.25</b> ) | -0.03 (-0.14, 0.07)         |
| Maternal education         | -0.03<br>(-0.32, 0.26)      | 0.14 (-0.21, 0.49)          | -0.04 (-0.62, 0.55) | NA                     | NA                          | NA                  | -0.01<br>(-0.31, 0.29)                       | 0.06 (-0.30, 0.43)          | -0.03 (-0.69, 0.64)         | 0.00<br>(-Inf, -0.41)       | 0.12 (-0.95, 0.52)          | NA                  | -0.03<br>(-0.24, 0.19)                       | 0.10 (-0.15, 0.36)          |
| Graffar Index <sup>d</sup> | -0.12<br>(-0.23, -0.01)     | -0.13 (-0.27, 0.01)         | -0.15 (-0.39, 0.08) | -0.08<br>(-0.22, 0.07) | -0.13 (-0.28, 0.03)         | -0.13 (-0.41, 0.28) | -0.07<br>(-0.19, 0.06)                       | 0.12 (-0.03, 0.28)          | 0.28<br>(0.00, 0.57)        | -0.03<br>(-5.15, 0.23)      | 0.13 (-0.24, 0.29)          | 0.23 (-0.16, 0.52)  | -0.09<br>(-0.18, -0.00)                      | -0.01 (-0.11, 0.09)         |

<sup>a</sup> Size units are percentage change in log(weight) from average, tempo units are time (days), velocity units in percent change from average.

<sup>b</sup> Bold values indicate significance with Bonferroni correction at alpha level of 0.05

<sup>c</sup> Adjusted linear regression models only include non-zero coefficients from lasso regression models that include all covariates in full model.

<sup>d</sup> Higher Graffar index values indicate lower socioeconomic status.

Table 3. Sociodemographic predictors and association with length SITAR growth parameters<sup>a,b</sup> stratified by sex of child in the Santiago Longitudinal Study, 1991-1996

| Characteristic             | Males                          |                             |                                |                             | Females                        |                             |                                |                             | Both                           |                             |                                |                             |
|----------------------------|--------------------------------|-----------------------------|--------------------------------|-----------------------------|--------------------------------|-----------------------------|--------------------------------|-----------------------------|--------------------------------|-----------------------------|--------------------------------|-----------------------------|
|                            | Unadjusted                     |                             | Adjusted <sup>c</sup>          |                             | Unadjusted                     |                             | Adjusted <sup>c</sup>          |                             | Unadjusted                     |                             | Adjusted <sup>c</sup>          |                             |
|                            | Tempo                          | Velocity                    |
| Gest age                   | <b>-3.33</b><br>(-4.09, -2.56) | <b>0.99</b><br>(0.29, 1.68) | <b>-3.05</b><br>(-4.10, -2.55) | NA                          | <b>-2.57</b><br>(-3.36, -1.79) | 0.25 (-0.52, 1.02)          | <b>-2.53</b><br>(-3.33, -1.77) | NA                          | <b>-2.97</b><br>(-3.52, -2.42) | <b>0.64</b><br>(0.12, 1.15) | <b>-2.94</b><br>(-3.51, -2.41) | <b>0.61</b><br>(0.06, 1.15) |
| Maternal age               | -0.04<br>(-0.18, 0.09)         | 0.09 (-0.03, 0.20)          | -0.01<br>(-0.10, 1.64)         | NA                          | <b>-0.17</b><br>(-0.30, -0.03) | 0.01 (-0.13, 0.14)          | -0.15<br>(-0.29, 0.01)         | NA                          | -0.10<br>(-0.19, -0.00)        | 0.05 (-0.04, 0.14)          | -0.07<br>(-0.17, 0.06)         | 0.02 (-0.35, 0.10)          |
| Maternal education         | 0.06 (-0.26, 0.38)             | 0.12 (-0.16, 0.40)          | NA                             | NA                          | -0.18<br>(-0.49, 0.13)         | 0.28 (-0.01, 0.58)          | -0.14<br>(-0.45, 0.52)         | 0.16 (-0.35, 0.52)          | -0.05<br>(-0.28, 0.17)         | 0.20 (-0.40, 0.40)          | -0.06<br>(-0.27, 0.73)         | 0.13 (-0.21, 0.34)          |
| Graffar Index <sup>d</sup> | 0.06 (-0.06, 0.19)             | <b>-0.26</b> (-0.37, -0.15) | 0.05 (-0.25, 0.36)             | <b>-0.21</b> (-0.37, -0.14) | <b>0.16</b><br>(0.03, 0.29)    | <b>-0.19</b> (-0.32, -0.07) | 0.13 (-0.03, 0.26)             | <b>-0.17</b> (-0.31, -0.05) | <b>0.11</b><br>(0.02, 0.20)    | <b>-0.23</b> (-0.31, -0.15) | 0.09 (-0.02, 0.18)             | <b>-0.22</b> (-0.31, -0.13) |

<sup>a</sup> Size units are percentage change in log<sub>e</sub>(length) from average, tempo units are time (days), velocity units in percent change from average.

<sup>b</sup> Bold values indicate significance with Bonferroni correction at alpha level of 0.05

<sup>c</sup> Adjusted linear regression models only include non-zero coefficients from lasso regression models that include all covariates in full model.

<sup>d</sup> Higher Graffar index values indicate lower socioeconomic status.

Table 4. Sociodemographic predictors and association with weight-for-length (WFL) SITAR growth parameters<sup>a,b</sup> stratified by sex of child in the Santiago Longitudinal Study, 1991-1996

| Characteristic             | Males                     |                                                     |                           |                                                     | Females                   |                                                     |                          |                                                     | Both                      |                                                     |                          |                                                     |
|----------------------------|---------------------------|-----------------------------------------------------|---------------------------|-----------------------------------------------------|---------------------------|-----------------------------------------------------|--------------------------|-----------------------------------------------------|---------------------------|-----------------------------------------------------|--------------------------|-----------------------------------------------------|
|                            | Unadjusted                |                                                     | Adjusted <sup>c</sup>     |                                                     | Unadjusted                |                                                     | Adjusted <sup>c</sup>    |                                                     | Unadjusted                |                                                     | Adjusted <sup>c</sup>    |                                                     |
|                            | Size                      | Tempo                                               | Size                      | Tempo                                               | Size                      | Tempo                                               | Size                     | Tempo                                               | Size                      | Tempo                                               | Size                     | Tempo                                               |
| Gest age                   | 0.09<br>(-0.55,<br>0.73)  | <b>-2.03</b> (-<br><b>2.91</b> , -<br><b>1.15</b> ) | NA                        | <b>-1.58</b> (-<br><b>2.90</b> , -<br><b>1.11</b> ) | 0.05<br>(-0.58,<br>0.69)  | <b>-2.34</b> (-<br><b>3.35</b> , -<br><b>1.32</b> ) | NA                       | <b>-2.32</b> (-<br><b>3.35</b> , -<br><b>1.33</b> ) | 0.07<br>(-0.38,<br>0.52)  | <b>-2.17</b> (-<br><b>2.84</b> , -<br><b>1.51</b> ) | NA                       | <b>-1.99</b> (-<br><b>2.83</b> , -<br><b>1.49</b> ) |
| Maternal age               | 0.07<br>(-0.03,<br>0.18)  | -0.09 (-<br>0.23,<br>0.06)                          | 0.04<br>(-0.23,<br>0.16)  | -0.08 (-<br>0.24,<br>0.17)                          | 0.02<br>(-0.09,<br>0.13)  | -0.18 (-<br>0.36,<br>0.00)                          | NA                       | -0.13 (-<br>0.36,<br>0.14)                          | 0.05<br>(-0.03,<br>0.12)  | -0.13 (-<br>0.24,<br>0.02)                          | 0.03<br>(-0.16,<br>0.12) | -0.11 (-<br>0.22,<br>0.03)                          |
| Maternal education         | -0.09<br>(-0.35,<br>0.16) | 0.08 (-<br>0.27,<br>0.44)                           | NA                        | NA                                                  | -0.10<br>(-0.35,<br>0.14) | 0.00 (-<br>0.40,<br>0.40)                           | NA                       | 0.07 (-<br>2.11,<br>0.42)                           | -0.10<br>(-0.28,<br>0.08) | 0.04 (-<br>0.22,<br>0.31)                           | NA                       | NA                                                  |
| Graffar Index <sup>d</sup> | -0.08<br>(-0.18,<br>0.02) | -0.07 (-<br>0.21,<br>0.07)                          | -0.05<br>(-0.17,<br>0.15) | -0.08 (-<br>0.24,<br>0.17)                          | 0.08<br>(-0.02,<br>0.19)  | <b>0.26</b><br><b>(0.10,</b><br><b>0.43)</b>        | 0.04<br>(-0.21,<br>0.18) | <b>0.25</b><br><b>(0.05,</b><br><b>0.42)</b>        | -0.01<br>(-0.08,<br>0.07) | 0.08 (-<br>0.03,<br>0.19)                           | NA                       | 0.06 (-<br>0.14,<br>0.17)                           |

<sup>a</sup> Size units are percentage change in log(WFL) from average, tempo units are time (days), velocity units in percent change from average.

<sup>b</sup> Bold values indicate significance with Bonferroni correction at alpha level of 0.05

<sup>c</sup> Adjusted linear regression models only include non-zero coefficients from lasso regression models that include all covariates in full model.

<sup>d</sup> Higher Graffar index values indicate lower socioeconomic status.

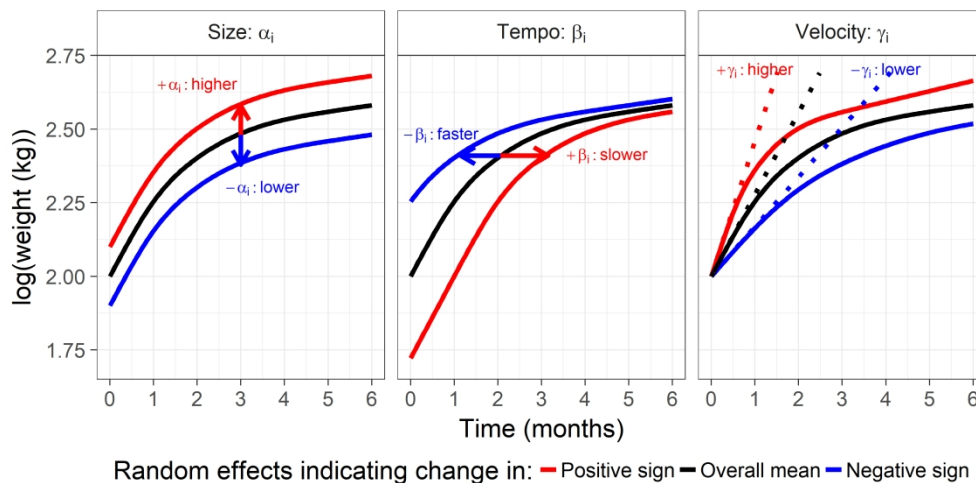

Figure 1. Type of change in random effects relative to the sample mean trajectory in weight growth curve trajectories following a shape invariant model (SIM).

Appendix Table 1. Description of items used for Graffar index

| Graffar item                                      | Scale                                  | n(%)        |
|---------------------------------------------------|----------------------------------------|-------------|
| n                                                 |                                        | 1412        |
| No. people in hh 'eating from 1 pot' (%)          | 1: 1-3                                 | 230 (16.3)  |
|                                                   | 2: 4-6                                 | 865 (61.3)  |
|                                                   | 3: 7-9                                 | 254 (18.0)  |
|                                                   | 4: 10-12                               | 55 ( 3.9)   |
|                                                   | 5: 13-15                               | 6 ( 0.4)    |
|                                                   | 6: over 16                             | 2 ( 0.1)    |
| Father's presence in household (%)                | 1: father is present; not left hh      | 1197 (84.8) |
|                                                   | 3: left hh but sends money             | 66 ( 4.7)   |
|                                                   | 4: partially left hh                   | 38 ( 2.7)   |
|                                                   | 6: completely gone                     | 111 ( 7.9)  |
| Head of household's highest educational level (%) | 1: university completed                | 12 ( 0.9)   |
|                                                   | 2: university not completed            | 9 ( 0.6)    |
|                                                   | 3: h.s. or technical studies completed | 325 (23.0)  |
|                                                   | 4: completed 8th grade                 | 664 (47.1)  |
|                                                   | 5: did not reach 8th grade             | 382 (27.1)  |
|                                                   | 6: no schooling                        | 19 ( 1.3)   |
| Property ownership (%)                            | 1: owned                               | 269 (19.1)  |
|                                                   | 2: home mortgage                       | 83 ( 5.9)   |
|                                                   | 3: rent                                | 243 (17.2)  |
|                                                   | 4: given to you as a gift              | 117 ( 8.3)  |
|                                                   | 5: squatters w tents or construction   | 7 ( 0.5)    |
|                                                   | 6: lving in back of main house         | 693 (49.1)  |
| Type of house construction (%)                    | 1: very large house                    | 15 ( 1.1)   |
|                                                   | 2: smaller house                       | 181 (12.8)  |
|                                                   | 3: tiny concrete house                 | 330 (23.4)  |

Appendix Table 1. Description of items used for Graffar index

| Graffar item                                                                                 | Scale                                    | n(%)        |
|----------------------------------------------------------------------------------------------|------------------------------------------|-------------|
|                                                                                              | 4: self-constructed home                 | 398 (28.2)  |
|                                                                                              | 5: wooden house                          | 94 ( 6.7)   |
|                                                                                              | 6: wooden house w/ less than three rooms | 394 (27.9)  |
| Characteristics of the kitchen (%)                                                           | 1: independent kitchen in one room       | 931 (65.9)  |
|                                                                                              | 6: kitchen in a room with multiple uses  | 481 (34.1)  |
| Sewage,plumbing (%)                                                                          | 1: inside plumbing                       | 1402 (99.3) |
|                                                                                              | 5: out house                             | 9 ( 0.6)    |
|                                                                                              | 6: just go in woods                      | 1 ( 0.1)    |
| Water (%)                                                                                    | 1: water from inside home faucet         | 949 (67.2)  |
|                                                                                              | 6: water from outside faucet             | 463 (32.8)  |
| No. times garbage collected per week (%)                                                     | 1: more than 4x/week                     | 6 ( 0.4)    |
|                                                                                              | 2: 3 times/week                          | 1288 (91.2) |
|                                                                                              | 3: 2 times/week                          | 117 ( 8.3)  |
|                                                                                              | 6: never                                 | 1 ( 0.1)    |
| Total count of previous six goods,possession (tv, washing machine, stereo, refrig., car) (%) | 1: 13-15 (own all six goods)             | 77 ( 5.5)   |
|                                                                                              | 2: 10-12                                 | 311 (22.3)  |
|                                                                                              | 3: 7-9                                   | 302 (21.6)  |
|                                                                                              | 4: 4-6                                   | 277 (19.9)  |
|                                                                                              | 5: 1-3                                   | 374 (26.8)  |
|                                                                                              | 6: 0                                     | 54 ( 3.9)   |



Appendix Table 2. Nonlinear mixed effects model fit evaluation: BIC for all evaluated models

| Trajectory type | Model ID          | Model description                           | BIC <sup>a</sup> |
|-----------------|-------------------|---------------------------------------------|------------------|
| Weight          | no random effects | no random effects                           | NA               |
|                 | m2                | random size (alpha0)                        | -19546.4         |
|                 | m3                | random tempo (beta0)                        | -17232           |
|                 | m4                | random velocity (beta1)                     | -18323           |
|                 | m5                | random tempo and velocity (beta0 and beta1) | -21901.5         |
|                 | m5.strat          | m5 + sex-spec effects                       | -22123.4         |
|                 | m5.strat2         | m5.strat + sex-spec corr structure          | -22107.5         |
|                 | m6                | random size and tempo (alpha0 and beta0)    | -21740.4         |
|                 | m7                | random size and velocity (alpha0 and beta1) | -21629.8         |
| Height          | no random effects | no random effects                           | NA               |
|                 | m2                | random size (alpha0)                        | -37399.5         |
|                 | m3                | random tempo (beta0)                        | -36684.1         |
|                 | m4                | random velocity (beta1)                     | -34985.7         |
|                 | m5                | random tempo and velocity (beta0 and beta1) | -37820           |
|                 | m5.strat          | m5 + sex-spec effects                       |                  |
|                 | m5.strat2         | m5.strat + sex-spec corr structure          | -37978.2         |
|                 | m6                | random size and tempo (alpha0 and beta0)    | -37381.5         |
|                 | m7                | random size and velocity (alpha0 and beta1) | -37819.9         |
| WFL             | no random effects | no random effects                           | NA               |
|                 | m2                | random size (alpha0)                        | -21147.2         |
|                 | m3                | random tempo (beta0)                        | -18852.1         |
|                 | m4                | random velocity (beta1)                     | -20549.9         |
|                 | m5                | random tempo and velocity (beta0 and beta1) | -22598           |
|                 | m5.strat          | m5 + sex-spec effects                       | -22761.2         |
|                 | m5.strat2         | m5.strat + sex-spec corr structure          | -22751.3         |
|                 | m6                | random size and tempo (alpha0 and beta0)    |                  |

Appendix Table 2. Nonlinear mixed effects model fit evaluation: BIC for all evaluated models

| Trajectory type | Model ID | Model description                           | BIC <sup>a</sup> |
|-----------------|----------|---------------------------------------------|------------------|
|                 | m7       | random size and velocity (alpha0 and beta1) | -22484.6         |

<sup>a</sup>Bold values indicate lowest value within a trajectory evaluation.

For peer review only

# Reporting checklist for cohort study.

Based on the STROBE cohort guidelines.

## Instructions to authors

Complete this checklist by entering the page numbers from your manuscript where readers will find each of the items listed below.

Your article may not currently address all the items on the checklist. Please modify your text to include the missing information. If you are certain that an item does not apply, please write "n/a" and provide a short explanation.

Upload your completed checklist as an extra file when you submit to a journal.

In your methods section, say that you used the STROBE cohort reporting guidelines, and cite them as:

von Elm E, Altman DG, Egger M, Pocock SJ, Gøtzsche PC, Vandenbroucke JP. The Strengthening the Reporting of Observational Studies in Epidemiology (STROBE) Statement: guidelines for reporting observational studies.

|                           |                                                                                                        | Page   |
|---------------------------|--------------------------------------------------------------------------------------------------------|--------|
|                           | Reporting Item                                                                                         | Number |
| <b>Title and abstract</b> |                                                                                                        |        |
| Title                     | <a href="#">#1a</a> Indicate the study's design with a commonly used term in the title or the abstract | 1      |

|    |                      |                     |                                                                 |    |
|----|----------------------|---------------------|-----------------------------------------------------------------|----|
| 1  | Abstract             | <a href="#">#1b</a> | Provide in the abstract an informative and balanced summary     | 3  |
| 2  |                      |                     | of what was done and what was found                             |    |
| 3  |                      |                     |                                                                 |    |
| 4  |                      |                     |                                                                 |    |
| 5  |                      |                     |                                                                 |    |
| 6  | <b>Introduction</b>  |                     |                                                                 |    |
| 7  |                      |                     |                                                                 |    |
| 8  |                      |                     |                                                                 |    |
| 9  |                      |                     |                                                                 |    |
| 10 | Background /         | <a href="#">#2</a>  | Explain the scientific background and rationale for the         | 4  |
| 11 | rationale            |                     | investigation being reported                                    |    |
| 12 |                      |                     |                                                                 |    |
| 13 |                      |                     |                                                                 |    |
| 14 |                      |                     |                                                                 |    |
| 15 | Objectives           | <a href="#">#3</a>  | State specific objectives, including any prespecified           | 4  |
| 16 |                      |                     | hypotheses                                                      |    |
| 17 |                      |                     |                                                                 |    |
| 18 |                      |                     |                                                                 |    |
| 19 |                      |                     |                                                                 |    |
| 20 | <b>Methods</b>       |                     |                                                                 |    |
| 21 |                      |                     |                                                                 |    |
| 22 |                      |                     |                                                                 |    |
| 23 | Study design         | <a href="#">#4</a>  | Present key elements of study design early in the paper         | 5  |
| 24 |                      |                     |                                                                 |    |
| 25 |                      |                     |                                                                 |    |
| 26 | Setting              | <a href="#">#5</a>  | Describe the setting, locations, and relevant dates, including  | 5  |
| 27 |                      |                     | periods of recruitment, exposure, follow-up, and data           |    |
| 28 |                      |                     | collection                                                      |    |
| 29 |                      |                     |                                                                 |    |
| 30 |                      |                     |                                                                 |    |
| 31 |                      |                     |                                                                 |    |
| 32 |                      |                     |                                                                 |    |
| 33 |                      |                     |                                                                 |    |
| 34 | Eligibility criteria | <a href="#">#6a</a> | Give the eligibility criteria, and the sources and methods of   | 5  |
| 35 |                      |                     | selection of participants. Describe methods of follow-up.       |    |
| 36 |                      |                     |                                                                 |    |
| 37 |                      |                     |                                                                 |    |
| 38 |                      |                     |                                                                 |    |
| 39 | Eligibility criteria | <a href="#">#6b</a> | For matched studies, give matching criteria and number of       | na |
| 40 |                      |                     | exposed and unexposed                                           |    |
| 41 |                      |                     |                                                                 |    |
| 42 |                      |                     |                                                                 |    |
| 43 |                      |                     |                                                                 |    |
| 44 |                      |                     |                                                                 |    |
| 45 | Variables            | <a href="#">#7</a>  | Clearly define all outcomes, exposures, predictors, potential   | 5  |
| 46 |                      |                     | confounders, and effect modifiers. Give diagnostic criteria, if |    |
| 47 |                      |                     | applicable                                                      |    |
| 48 |                      |                     |                                                                 |    |
| 49 |                      |                     |                                                                 |    |
| 50 |                      |                     |                                                                 |    |
| 51 |                      |                     |                                                                 |    |
| 52 |                      |                     |                                                                 |    |
| 53 | Data sources /       | <a href="#">#8</a>  | For each variable of interest give sources of data and details  | 5  |
| 54 | measurement          |                     | of methods of assessment (measurement). Describe                |    |
| 55 |                      |                     | comparability of assessment methods if there is more than       |    |
| 56 |                      |                     |                                                                 |    |
| 57 |                      |                     |                                                                 |    |
| 58 |                      |                     |                                                                 |    |
| 59 |                      |                     |                                                                 |    |
| 60 |                      |                     |                                                                 |    |

one group. Give information separately for for exposed and unexposed groups if applicable.

|    |                |                      |                                                               |    |
|----|----------------|----------------------|---------------------------------------------------------------|----|
| 1  |                |                      |                                                               |    |
| 2  |                |                      |                                                               |    |
| 3  |                |                      |                                                               |    |
| 4  |                |                      |                                                               |    |
| 5  |                |                      |                                                               |    |
| 6  | Bias           | <a href="#">#9</a>   | Describe any efforts to address potential sources of bias     | 6  |
| 7  |                |                      |                                                               |    |
| 8  |                |                      |                                                               |    |
| 9  | Study size     | <a href="#">#10</a>  | Explain how the study size was arrived at                     | 5  |
| 10 |                |                      |                                                               |    |
| 11 |                |                      |                                                               |    |
| 12 | Quantitative   | <a href="#">#11</a>  | Explain how quantitative variables were handled in the        | 6  |
| 13 |                |                      |                                                               |    |
| 14 | variables      |                      | analyses. If applicable, describe which groupings were        |    |
| 15 |                |                      |                                                               |    |
| 16 |                |                      | chosen, and why                                               |    |
| 17 |                |                      |                                                               |    |
| 18 |                |                      |                                                               |    |
| 19 | Statistical    | <a href="#">#12a</a> | Describe all statistical methods, including those used to     | 6  |
| 20 |                |                      |                                                               |    |
| 21 | methods        |                      | control for confounding                                       |    |
| 22 |                |                      |                                                               |    |
| 23 |                |                      |                                                               |    |
| 24 |                |                      |                                                               |    |
| 25 | Statistical    | <a href="#">#12b</a> | Describe any methods used to examine subgroups and            | na |
| 26 |                |                      |                                                               |    |
| 27 | methods        |                      | interactions                                                  |    |
| 28 |                |                      |                                                               |    |
| 29 |                |                      |                                                               |    |
| 30 | Statistical    | <a href="#">#12c</a> | Explain how missing data were addressed                       | 7  |
| 31 |                |                      |                                                               |    |
| 32 | methods        |                      |                                                               |    |
| 33 |                |                      |                                                               |    |
| 34 |                |                      |                                                               |    |
| 35 |                |                      |                                                               |    |
| 36 | Statistical    | <a href="#">#12d</a> | If applicable, explain how loss to follow-up was addressed    | na |
| 37 |                |                      |                                                               |    |
| 38 | methods        |                      |                                                               |    |
| 39 |                |                      |                                                               |    |
| 40 |                |                      |                                                               |    |
| 41 | Statistical    | <a href="#">#12e</a> | Describe any sensitivity analyses                             | na |
| 42 |                |                      |                                                               |    |
| 43 | methods        |                      |                                                               |    |
| 44 |                |                      |                                                               |    |
| 45 |                |                      |                                                               |    |
| 46 | <b>Results</b> |                      |                                                               |    |
| 47 |                |                      |                                                               |    |
| 48 |                |                      |                                                               |    |
| 49 | Participants   | <a href="#">#13a</a> | Report numbers of individuals at each stage of study—eg       | 7  |
| 50 |                |                      |                                                               |    |
| 51 |                |                      | numbers potentially eligible, examined for eligibility,       |    |
| 52 |                |                      |                                                               |    |
| 53 |                |                      | confirmed eligible, included in the study, completing follow- |    |
| 54 |                |                      |                                                               |    |
| 55 |                |                      |                                                               |    |
| 56 |                |                      |                                                               |    |
| 57 |                |                      |                                                               |    |
| 58 |                |                      |                                                               |    |
| 59 |                |                      |                                                               |    |
| 60 |                |                      |                                                               |    |

up, and analysed. Give information separately for for  
exposed and unexposed groups if applicable.

|    |                  |                      |                                                                      |
|----|------------------|----------------------|----------------------------------------------------------------------|
| 1  |                  |                      |                                                                      |
| 2  |                  |                      |                                                                      |
| 3  |                  |                      |                                                                      |
| 4  |                  |                      |                                                                      |
| 5  |                  |                      |                                                                      |
| 6  | Participants     | <a href="#">#13b</a> | Give reasons for non-participation at each stage 7                   |
| 7  |                  |                      |                                                                      |
| 8  |                  |                      |                                                                      |
| 9  | Participants     | <a href="#">#13c</a> | Consider use of a flow diagram na                                    |
| 10 |                  |                      |                                                                      |
| 11 |                  |                      |                                                                      |
| 12 | Descriptive data | <a href="#">#14a</a> | Give characteristics of study participants (eg demographic, 7        |
| 13 |                  |                      |                                                                      |
| 14 |                  |                      | clinical, social) and information on exposures and potential         |
| 15 |                  |                      | confounders. Give information separately for exposed and             |
| 16 |                  |                      | unexposed groups if applicable.                                      |
| 17 |                  |                      |                                                                      |
| 18 |                  |                      |                                                                      |
| 19 |                  |                      |                                                                      |
| 20 |                  |                      |                                                                      |
| 21 |                  |                      |                                                                      |
| 22 | Descriptive data | <a href="#">#14b</a> | Indicate number of participants with missing data for each 7         |
| 23 |                  |                      |                                                                      |
| 24 |                  |                      | variable of interest                                                 |
| 25 |                  |                      |                                                                      |
| 26 |                  |                      |                                                                      |
| 27 | Descriptive data | <a href="#">#14c</a> | Summarise follow-up time (eg, average and total amount) na           |
| 28 |                  |                      |                                                                      |
| 29 |                  |                      |                                                                      |
| 30 | Outcome data     | <a href="#">#15</a>  | Report numbers of outcome events or summary measures na              |
| 31 |                  |                      |                                                                      |
| 32 |                  |                      | over time. Give information separately for exposed and               |
| 33 |                  |                      | unexposed groups if applicable.                                      |
| 34 |                  |                      |                                                                      |
| 35 |                  |                      |                                                                      |
| 36 |                  |                      |                                                                      |
| 37 |                  |                      |                                                                      |
| 38 | Main results     | <a href="#">#16a</a> | Give unadjusted estimates and, if applicable, confounder- 7-8        |
| 39 |                  |                      |                                                                      |
| 40 |                  |                      | adjusted estimates and their precision (eg, 95% confidence           |
| 41 |                  |                      | interval). Make clear which confounders were adjusted for            |
| 42 |                  |                      | and why they were included                                           |
| 43 |                  |                      |                                                                      |
| 44 |                  |                      |                                                                      |
| 45 |                  |                      |                                                                      |
| 46 |                  |                      |                                                                      |
| 47 |                  |                      |                                                                      |
| 48 | Main results     | <a href="#">#16b</a> | Report category boundaries when continuous variables were na         |
| 49 |                  |                      |                                                                      |
| 50 |                  |                      | categorized                                                          |
| 51 |                  |                      |                                                                      |
| 52 |                  |                      |                                                                      |
| 53 | Main results     | <a href="#">#16c</a> | If relevant, consider translating estimates of relative risk into na |
| 54 |                  |                      |                                                                      |
| 55 |                  |                      | absolute risk for a meaningful time period                           |
| 56 |                  |                      |                                                                      |
| 57 |                  |                      |                                                                      |
| 58 |                  |                      |                                                                      |
| 59 |                  |                      |                                                                      |
| 60 |                  |                      |                                                                      |

|    |                          |                     |                                                                |     |
|----|--------------------------|---------------------|----------------------------------------------------------------|-----|
| 1  | Other analyses           | <a href="#">#17</a> | Report other analyses done—e.g., analyses of subgroups         | na  |
| 2  |                          |                     |                                                                |     |
| 3  |                          |                     | and interactions, and sensitivity analyses                     |     |
| 4  |                          |                     |                                                                |     |
| 5  |                          |                     |                                                                |     |
| 6  | <b>Discussion</b>        |                     |                                                                |     |
| 7  |                          |                     |                                                                |     |
| 8  |                          |                     |                                                                |     |
| 9  |                          |                     |                                                                |     |
| 10 | Key results              | <a href="#">#18</a> | Summarise key results with reference to study objectives       | 8-9 |
| 11 |                          |                     |                                                                |     |
| 12 |                          |                     |                                                                |     |
| 13 | Limitations              | <a href="#">#19</a> | Discuss limitations of the study, taking into account sources  | 10  |
| 14 |                          |                     |                                                                |     |
| 15 |                          |                     | of potential bias or imprecision. Discuss both direction and   |     |
| 16 |                          |                     |                                                                |     |
| 17 |                          |                     | magnitude of any potential bias.                               |     |
| 18 |                          |                     |                                                                |     |
| 19 |                          |                     |                                                                |     |
| 20 | Interpretation           | <a href="#">#20</a> | Give a cautious overall interpretation considering objectives, | 10  |
| 21 |                          |                     |                                                                |     |
| 22 |                          |                     | limitations, multiplicity of analyses, results from similar    |     |
| 23 |                          |                     |                                                                |     |
| 24 |                          |                     | studies, and other relevant evidence.                          |     |
| 25 |                          |                     |                                                                |     |
| 26 |                          |                     |                                                                |     |
| 27 |                          |                     |                                                                |     |
| 28 | Generalisability         | <a href="#">#21</a> | Discuss the generalisability (external validity) of the study  | 10  |
| 29 |                          |                     |                                                                |     |
| 30 |                          |                     | results                                                        |     |
| 31 |                          |                     |                                                                |     |
| 32 |                          |                     |                                                                |     |
| 33 | <b>Other Information</b> |                     |                                                                |     |
| 34 |                          |                     |                                                                |     |
| 35 |                          |                     |                                                                |     |
| 36 | Funding                  | <a href="#">#22</a> | Give the source of funding and the role of the funders for the | 10  |
| 37 |                          |                     |                                                                |     |
| 38 |                          |                     | present study and, if applicable, for the original study on    |     |
| 39 |                          |                     |                                                                |     |
| 40 |                          |                     | which the present article is based                             |     |
| 41 |                          |                     |                                                                |     |
| 42 |                          |                     |                                                                |     |
| 43 |                          |                     |                                                                |     |

The STROBE checklist is distributed under the terms of the Creative Commons Attribution License CC-BY. This checklist was completed on 16. August 2019 using <https://www.goodreports.org/>, a tool made by the [EQUATOR Network](#) in collaboration with [Penelope.ai](#)

# BMJ Open

## Sociodemographic predictors of early postnatal growth: evidence from a Chilean infancy cohort.

|                                 |                                                                                                                                                                                                                                                                                                                                                                                                                                                                                                                                                                                                                                                                                                                                                                                                                                                                        |
|---------------------------------|------------------------------------------------------------------------------------------------------------------------------------------------------------------------------------------------------------------------------------------------------------------------------------------------------------------------------------------------------------------------------------------------------------------------------------------------------------------------------------------------------------------------------------------------------------------------------------------------------------------------------------------------------------------------------------------------------------------------------------------------------------------------------------------------------------------------------------------------------------------------|
| Journal:                        | <i>BMJ Open</i>                                                                                                                                                                                                                                                                                                                                                                                                                                                                                                                                                                                                                                                                                                                                                                                                                                                        |
| Manuscript ID                   | bmjopen-2019-033695.R1                                                                                                                                                                                                                                                                                                                                                                                                                                                                                                                                                                                                                                                                                                                                                                                                                                                 |
| Article Type:                   | Original research                                                                                                                                                                                                                                                                                                                                                                                                                                                                                                                                                                                                                                                                                                                                                                                                                                                      |
| Date Submitted by the Author:   | 22-Jan-2020                                                                                                                                                                                                                                                                                                                                                                                                                                                                                                                                                                                                                                                                                                                                                                                                                                                            |
| Complete List of Authors:       | Von Holle, Ann; University of North Carolina at Chapel Hill, Epidemiology North, Kari; University of North Carolina at Chapel Hill<br>Gahagan, Sheila; University of California San Diego, Child Development and Community Health<br>Burrows, Raquel; University of Chile, Institute of Nutrition and Food Technology<br>Blanco, Estela; University of California San Diego, Child Development and Community Health<br>Lozoff, Betsy; University of Michigan, Department of Pediatrics<br>Howard, Annie Green; University of North Carolina System, Biostatistics<br>Justice, Anne; Geisinger Health, Center for Biomedical and Translational Informatics<br>Graff, Misa; University of North Carolina at Chapel Hill, Epidemiology<br>Voruganti, V. Saroja; University of North Carolina at Chapel Hill, Department of Nutrition and UNC Nutrition Research Institute |
| <b>Primary Subject Heading</b>: | Epidemiology                                                                                                                                                                                                                                                                                                                                                                                                                                                                                                                                                                                                                                                                                                                                                                                                                                                           |
| Secondary Subject Heading:      | Paediatrics                                                                                                                                                                                                                                                                                                                                                                                                                                                                                                                                                                                                                                                                                                                                                                                                                                                            |
| Keywords:                       | EPIDEMIOLOGY, PUBLIC HEALTH, Community child health < PAEDIATRICS                                                                                                                                                                                                                                                                                                                                                                                                                                                                                                                                                                                                                                                                                                                                                                                                      |
|                                 |                                                                                                                                                                                                                                                                                                                                                                                                                                                                                                                                                                                                                                                                                                                                                                                                                                                                        |

SCHOLARONE™  
Manuscripts





I, the Submitting Author has the right to grant and does grant on behalf of all authors of the Work (as defined in the below author licence), an exclusive licence and/or a non-exclusive licence for contributions from authors who are: i) UK Crown employees; ii) where BMJ has agreed a CC-BY licence shall apply, and/or iii) in accordance with the terms applicable for US Federal Government officers or employees acting as part of their official duties; on a worldwide, perpetual, irrevocable, royalty-free basis to BMJ Publishing Group Ltd ("BMJ") its licensees and where the relevant Journal is co-owned by BMJ to the co-owners of the Journal, to publish the Work in this journal and any other BMJ products and to exploit all rights, as set out in our [licence](#).

The Submitting Author accepts and understands that any supply made under these terms is made by BMJ to the Submitting Author unless you are acting as an employee on behalf of your employer or a postgraduate student of an affiliated institution which is paying any applicable article publishing charge ("APC") for Open Access articles. Where the Submitting Author wishes to make the Work available on an Open Access basis (and intends to pay the relevant APC), the terms of reuse of such Open Access shall be governed by a Creative Commons licence – details of these licences and which [Creative Commons](#) licence will apply to this Work are set out in our licence referred to above.

Other than as permitted in any relevant BMJ Author's Self Archiving Policies, I confirm this Work has not been accepted for publication elsewhere, is not being considered for publication elsewhere and does not duplicate material already published. I confirm all authors consent to publication of this Work and authorise the granting of this licence.

1  
2  
3  
4 Title: Sociodemographic predictors of early postnatal growth: evidence from a Chilean  
5 infancy cohort  
6  
7

8  
9 *Ann Von Holle*

10 PO Box 12233 Mail Drop A3-03, 111 TW Alexander Drive, Research Triangle Park, NC 27709-2233. Email:  
11 [avonholle@gmail.com](mailto:avonholle@gmail.com); tel. 919-593-0299  
12

13  
14 (Corresponding author)  
15

16  
17 *Kari E. North*

18  
19 Department of Epidemiology, University of North Carolina, Chapel Hill, NC, United States  
20  
21

22  
23 *Sheila Gahagan*

24 Academic General Pediatrics, Child Development and Community Health Division, University of California,  
25 San Diego, CA, United States  
26  
27

28  
29 *Raquel Burrows*

30 Institute of Nutrition and Food Technology, University of Chile, Santiago, Chile  
31  
32

33  
34 *Estela Blanco*

35 Child Development and Community Health Division; University of California, San Diego, CA, United States  
36  
37

38  
39 *Betsy Lozoff*

40 Department of Pediatrics, University of Michigan, Ann Arbor, MI, United States  
41  
42

43  
44 *Annie Green Howard*

45 Department of Biostatistics, University of North Carolina, Chapel Hill, NC, United States  
46  
47

48  
49 *Anne Justice*

50 Center for Biomedical and Translational Informatics, Geisinger Health, Danville, PA, United States  
51  
52

53  
54  
55 *Misa Graff*  
56  
57

1  
2  
3  
4  
5  
6  
7  
8  
9  
10  
11  
12  
13  
14  
15  
16  
17  
18  
19  
20  
21  
22  
23  
24  
25  
26  
27  
28  
29  
30  
31  
32  
33  
34  
35  
36  
37  
38  
39  
40  
41  
42  
43  
44  
45  
46  
47  
48  
49  
50  
51  
52  
53  
54  
55  
56  
57  
58  
59  
60

Department of Epidemiology, University of North Carolina, Chapel Hill, NC, United States

*Venkata Saroja Voruganti*

Department of Nutrition and UNC Nutrition Research Institute, University of North Carolina, Chapel Hill, NC, United States

Word Count: ~3,105

Number of references: 38

For peer review only

## Abstract

### Objectives

Infant anthropometric growth varies across socioeconomic factors, including maternal education and income, and may serve as an indicator of environmental influences in early life with long term health consequences. Previous research has identified sociodemographic gradients in growth with a focus on the first year and beyond, but estimates are sparse for growth before six months. Thus, our objective was to examine the relationship between sociodemographic factors and infant growth patterns between birth and five months of age.

### Design

Prospective cohort study

### Settings

Low- to middle-income neighborhoods in Santiago, Chile (1991-1996).

### Participants

1,412 participants from a randomized iron deficiency anemia preventive trial in healthy infants.

### Main outcome measures

Longitudinal anthropometrics including monthly weight (kg), length (cm) and weight-for-length (WFL) values. For each measure, we estimated three individual-level growth parameters (size, timing, and velocity) from SuperImposition by Translation and Rotation (SITAR) models. Size and timing changes represent vertical and horizontal growth curve shifts, respectively, and velocity change represents growth rate shifts. We estimated the linear association between growth parameters and gestational age, maternal age, education, and socioeconomic position (SEP).

### Results

Lower SEP was associated with a slower linear (length) velocity growth parameter (-0.22, 95% CI=-0.31,-0.13) – outcome units are percent change in velocity from the average growth curve. Lower SEP was associated with later WFL growth timing as demonstrated through the tempo growth parameter for females (0.25, 95% CI=0.05,0.42) – outcome units are shifts in days from the average growth curve. We found no evidence of associations between SEP and the weight size, timing, or velocity growth rate parameters.

### Conclusion

Previous research on growth in older infants and children shows associations between lower SEP with slower length velocity. We found evidence supporting this association in

1  
2  
3 the first five months of life, which may inform age-specific prevention efforts aimed at  
4 infant growth.  
5  
6  
7

## 8 **Strengths and Limitations of this Study**

- 9 • The sample includes monthly anthropometric measures in the first five postnatal  
10 months – not available in any study to date and allowing better fitting growth models.
- 11 • We used the Graffar Index, a detailed measure of socioeconomic position (SEP) specific  
12 to low- to middle-income groups, an understudied population, which may reduce  
13 misclassification of SEP.
- 14 • As the sample was low- to middle-income, these results may not generalize to groups  
15 with even lower or higher income or SEP.  
16  
17  
18  
19

## 20 **Introduction**

21  
22 Interest in early life infant growth has grown as evidence accumulates that it is associated  
23 with the development of adult disease, sometimes decades later. Some chronic disease  
24 outcomes associated with infant growth characteristics include obesity, endothelial  
25 dysfunction, and metabolic syndrome (1–3). Explanations for these associations include  
26 early infancy as a critical window of time for susceptibility to environmental exposures for  
27 chronic disease risk factors (4). Socioeconomic position (SEP) is one such exposure. SEP is  
28 associated with child growth patterns, in particular, length (5–12) and weight (13–16). In  
29 these studies, lower SEP is generally associated with faster weight gain during childhood,  
30 while the inverse holds true for length. These socioeconomic gradients in growth appear to  
31 emerge in early life (7) and persist (5).  
32  
33  
34

35 Gaps remain in our understanding regarding sociodemographic predictors of growth  
36 during infancy and childhood. One such gap relates to the earliest period of infant growth.  
37 Studies to date include only a few observations before six months, leading to linear  
38 specifications between weight or height and time. However, curvilinear models of growth  
39 offer better model fit for early infancy growth. Growth during the first six months in the  
40 human lifespan is characterized by accelerated growth at the outset and leveling off at  
41 around six months (17). Given these unique features, early infant growth may yield unique  
42 associations with predictors not influential during later periods of growth. Understanding  
43 the relationship between early infant growth and sociodemographic factors may yield new  
44 information that highlight the potential for earlier interventions to promote optimal health.  
45  
46

47 Identifying novel associations in this age range can better pinpoint the timing and influence  
48 of sociodemographic factors. Given the sparsity of information in the literature focusing on  
49 these points, our aim in this study is to examine sociodemographic predictors of infant  
50 weight, length and weight-for-length (WFL) growth from zero to five months in an infancy  
51 cohort of over 1,400 healthy Chilean children. Based on prior research in middle- to high-  
52 income countries applied to a wider range of ages in childhood that is described above, we  
53 expected that SEP will be inversely associated with weight gain and positively associated  
54 with length growth.  
55  
56  
57

## Methods

### Study sample

The data in this study are drawn from the Santiago Longitudinal Study (SLS), a cohort study from low- to middle-income neighborhoods in Santiago, Chile. Between 1991 and 1996, infants were recruited for an infancy iron deficiency anemia preventive trial (18) or neuromaturation study (19). Inclusion criteria for the infancy studies included full term infants [greater than or equal to 37 weeks gestational age (GA)] with birthweight  $\geq 3.0$  kg, vaginal birth, no major health problems for the infant, and, for the preventive trial, no iron deficiency anemia present at five to six months. Those with iron deficiency anemia and the next nonanemic control were invited to participate in the neuromaturation study and are not considered here. Participant eligibility and follow-up information have previously been reported (18). The Santiago Longitudinal Study (SLS) had been approved by Institutional Review Boards from 1) the University of Michigan, Ann Arbor, 2) Institute of Nutrition and Food Technology (INTA), Chile and 3) University of California, San Diego.

We characterized the growth period prior to treatment randomization, which occurred at six months. Anthropometric measures prior to study enrollment were obtained from the medical chart. The total sample size included 1,657 infants who completed the preventive trial.

### Outcome and sociodemographic measures

Anthropometric measurements included weight (kg), length (cm), and weight-for-length (WFL) (g/cm). Weight was measured to the nearest 0.01 kg on an electronic scale at local public health clinics. Length was measured on a recumbent board to the nearest 0.1 cm. Gestational age (GA), obtained from the medical chart, was among the set of variables included in the models as a covariate.

Sociodemographic measures were self-reported by the mother, including maternal age (years), total years of education, and the modified Graffar index (20), an index of SEP used in lower-income countries (21). The modified Graffar index represents a sum of 10 measures regarding education, family composition, and housing characteristics, which are summed to create a scale with higher values indicating lower social class (Appendix Table A1). Mothers self-reported breastfeeding characteristics from birth, including date of first bottle and age at weaning if weaned. From this information, we created variables for breastfeeding as the sole source of milk and mixed breast and bottle feeding at five months.

### Statistical analyses

Summary statistics included median and interquartile ranges for continuous variables and percent with counts for categorical variables. All summary statistics were stratified by child sex.

We used two steps to assess the association between infant growth and sociodemographic predictors: 1) SuperImposition by Translation and Rotation (SITAR) approach (22) to

1  
2  
3 estimate infant weight, length and weight-for-length (WFL) growth characteristics from  
4 birth to five months followed by 2) linear regression to estimate the relationship between  
5 sociodemographic predictors and these growth characteristics. We used a nonlinear mixed  
6 effects model (23) to estimate the growth characteristics with the R nlme package (24).  
7 Each model produces up to three different SITAR growth parameters per individual, which  
8 have been named 'size', 'tempo' and 'velocity' (22) (Figure 1). 'Size' indicates a shift of the  
9 growth curve up and down for an individual relative to the average growth curve. 'Tempo'  
10 indicates a shift of the growth curve to the left or right on the age scale for an individual  
11 relative to the average growth curve. Lastly, 'velocity' indicates a transformation of the age  
12 scale in the nonlinear model, shrinking or enlarging the age scale for an individual relative  
13 to the average growth curve. These three parameters are noted as having biologically  
14 meaningful interpretations, which are difficult to obtain with other growth models (23).  
15 Unless otherwise noted, any references to 'size', 'tempo', and 'velocity' refer to these  
16 parameters from the SITAR construct applied to early infant growth.  
17  
18  
19

20 [Figure 1 about here](#)

21  
22 The results from the second step analyses are reported. In addition to including males and  
23 females and adjusting for sex of the child (in the pooled analyses), sex-stratified analyses  
24 were also used for all three anthropometric outcomes, as some estimated associations  
25 between the SITAR growth parameters and SEP indicators differed by sex of the child.  
26  
27

28 The adjusted models in the second step started with four covariates: gestational age,  
29 maternal age, total years of maternal education, and Graffar index (20). We removed  
30 covariates from the model based on the least absolute shrinkage and selection operator  
31 (lasso) approach (25). This approach has better performance than conventional model  
32 selection methods with a univariate approach (26) such as stepwise methods (27). The  
33 lasso approach assists in selecting predictors with the strongest coefficients (28) while  
34 balancing bias and variation in the model. We used the glmnet package in R (29) to  
35 estimate shrunken parameters and the selectiveInference package (30) to provide  
36 inference via statistical tests and confidence intervals. Each set of comparisons by outcome,  
37 i.e. weight, length or weight-for-length were considered separately. Multiple comparisons  
38 increase the possibility of statistically significant study findings by chance alone. Therefore,  
39 we controlled for multiple comparisons using a Bonferroni correction at an alpha level of  
40 0.05. A coefficient for the predictor of a weight size growth parameter outcome in the  
41 second step indicates a change in log(kg) for a one-unit change in the predictor; we  
42 multiply this coefficient by 100 to make a symmetric percentage difference on a modified  
43 percentage scale (31). Similarly, a one-unit change in the predictor corresponds to a  
44 symmetric percentage change in the velocity growth parameter. Time (days) is not log  
45 transformed and the coefficient for this outcome corresponds to a shift in the time scale in  
46 days.  
47  
48  
49

50  
51 For analyses, we used a complete case data set, i.e., all participants with non-missing  
52 covariates. The proportion of missing data was less than one percent for all variables  
53 except the Graffar index, which had less than three percent missing. The median number of  
54 non-missing outcome (anthropometric) values was six out of six monthly measures (birth  
55 to five months). The percent of missing outcome values at each time point ranged from 9%  
56  
57

1  
2  
3 at months 1 and 2 to 0.2% at birth. In a post hoc data analysis we used logistic regression  
4 models to estimate associations between SEP (the Graffar Index) as a continuous variable,  
5 and binary breastfeeding status outcomes – any or exclusive – at five months.  
6  
7

## 8 Patient and public involvement

9  
10 Participants were mothers and infants recruited for research. The mothers were not  
11 involved in setting the study design, research questions or outcome measures for this  
12 study.  
13  
14

## 15 Results

16  
17 Participants (n=1,412) were 53% male and 47% female. Median gestational age (Q1, Q3)  
18 was 40 weeks (39, 40). Median maternal age (Q1, Q3) was 26 years (22, 31), and mothers  
19 had a median (IQR) of 10 (8, 12) years of education at the time of their infant's birth (Table  
20 1). For the six monthly anthropometric measurements prior to six months, each infant had  
21 at least two observations, and 72% had measures at all six time points.  
22  
23

24 Put table 1 about here

25  
26 We assessed best model fit for each anthropometric measure via the lowest Bayesian  
27 Information Criterion (BIC) for growth independent of any covariates. After evaluating all  
28 possible combinations of SITAR models from one to three parameters for each of the three  
29 anthropometric measures, best fit (Appendix Table A2) models included: 1) all three  
30 growth parameters for weight, i.e. 'size', 'tempo', and 'velocity', 2) sex-specific growth  
31 trajectories with tempo and velocity parameters for length, and 3) sex-specific growth  
32 trajectories with size and tempo parameters for WFL.  
33  
34

35 The following sections outline the adjusted results of the growth trajectory analyses for the  
36 three anthropometric outcomes: weight (kg), length (cm) and weight-for-length (WFL)  
37 (g/cm).  
38  
39

### 40 Weight trajectories: size, tempo and velocity

41 After including all covariates in the model, gestational age was the only characteristic  
42 associated with any weight growth parameters. In the pooled sample, gestational age was  
43 significantly associated with the weight tempo parameter (-2.01, 95% CI = -2.98, -1.70),  
44 indicating a leftward shift of about two days for each additional week in gestational age.  
45 This indicates earlier timing of weight gain in infants who were born with higher  
46 gestational age (Table 2). There was no substantive difference in this association in the sex-  
47 stratified analyses.  
48  
49

50 put table 2 about here

### 51 Length trajectories: tempo and velocity

52  
53 When evaluating the relationship between deviations from the average length growth  
54 characteristics and sociodemographic predictors, we found associations for SEP and  
55  
56  
57



gestational age. In the pooled group, the coefficient of association between the Graffar index and the velocity parameter (-0.22, 95% CI = -0.31, -0.13) (Table 3) indicated that for each unit increase in the Graffar index, lower values indicating higher SEP, there was a -0.22 percent decline from the average length velocity. Conversely, this association reflects a positive relationship between the length velocity parameter and SEP. This coefficient was not substantively different in the sex-stratified analyses, all of which indicated faster linear (length) growth with higher SEP. In contrast to the sex-stratified analyses, all covariates remained in the pooled adjusted model with less than 5% change from the unadjusted SEP coefficient (-0.23, 95% CI = -0.31, -0.15).

Similar to SEP, GA was also positively associated with the length velocity parameter, demonstrating a 0.61 percent (95% CI = 0.06, 1.15) increase from the average length velocity in the pooled sample for every unit increase in GA (weeks). Gestational age was inversely associated with the length tempo parameter in the pooled sample (-2.94, 95% CI = -3.51, -2.41), indicating a leftward shift of about three days of the trajectory on the time scale, and a faster start to length growth, for each one week increase in gestational age (Table 3).

[put Table 3 about here](#)

### **Weight-for-length trajectories: size and tempo**

Evaluations of shifts in WFL size and tempo from the average indicated associations with SEP and GA. Increases in the Graffar Index, equivalent to lower SEP, were associated with a positive shift in the WFL tempo parameter for females (0.25, 95% CI = 0.05, 0.42). This estimate approximates a rightward shift in time (days) relative to the average growth curve indicating later growth timing with lower SEP.

Similar to weight and length trajectory analyses, an increase in gestational age was inversely associated with a decline in tempo from the average in the pooled sample (-1.99, 95% CI = -2.83, -1.49) (Table 4) indicating about a two-day shift to the left on the time scale from the average growth curve for every one week increase in gestational age. Similar values were found in the sex-stratified analyses, all indicating earlier timing of WFL growth with higher gestational age.

[put Table 4 about here](#)

The post hoc analysis examining the association between odds of exclusive or any breastfeeding at five months and the continuous SEP measure (the Graffar index) did not find a substantive or significant association (data not shown).

## **Discussion**

In this research, we found that lower SEP, measured by the Graffar index, was inversely associated with length growth characteristics -- but not weight -- in the first six months. Lower SEP was associated with later timing of WFL growth as reflected by the positive association between the Graffar Index and the WFL tempo parameter. These higher tempo

1  
2  
3 values translate to a rightward shift in growth relative to the average growth curve as well  
4 as a later age at peak velocity (32). This delay in growth can be considered an unfavorable  
5 outcome associated with lower SEP.  
6

7 Maternal age was not associated with any of the three adjusted growth parameters for  
8 length, weight, or weight-for-length. Gestational age (GA) was inversely associated with the  
9 tempo growth parameters for length, weight, and weight-for-length indicating higher GA is  
10 associated with earlier timing of these three measures. Gestational age is also positively  
11 associated with length velocity in the pooled sample indicating faster length change with  
12 increasing GA.  
13  
14

15 Of three previous studies investigating associations between sociodemographic predictors  
16 and infant growth before six months, two found a positive association between length  
17 (linear) growth and maternal education (8,10), used as a proxy for SEP. Only one study  
18 found an inverse association with length growth (12). Many studies including age ranges  
19 exceeding six months of age up to five years of age demonstrated a positive association  
20 between maternal education and length/height growth (7,8,10). The majority of these  
21 studies support the conclusion that lower SEP is associated with slower length (linear)  
22 growth in infancy and early childhood.  
23  
24

25 Several prior studies representing high-income European countries have noted that their  
26 findings of either an inverse (12) or no relationship (7) between SEP and length (linear)  
27 growth may not generalize to low- to middle-income countries. Deviations from the  
28 Western diet and lifestyle were one of the reasons given for this limitation. Chile, the  
29 country from which our data were collected, offers an interesting context in this respect.  
30 The recruitment period for this study, 1991 to 1996, occurred as Chile was transitioning  
31 from a low-income to an upper-middle income country. In 1990, 40% of the Chilean  
32 population was below the poverty line (33); by 2012 WHO classified Chile as an upper  
33 middle-income country (34). There were nutrition and epidemiologic transitions (35,36)  
34 beginning in the 1970s and continuing during the 1990s when study infants were enrolled.  
35 Specifically, consumption of high-calorie food, accompanied by a sedentary lifestyle,  
36 resulted in rising obesity prevalence across all socioeconomic levels. In the context of an  
37 emerging Western diet and lifestyle, we found that lower SEP was associated with poorer  
38 length (linear) growth in early infancy. Of course, contemporary generations in Chile  
39 experience lower SEP in a new context of over-nutrition and higher levels of sedentary  
40 behavior. Thus, current studies in Chile may find distinct relationships between SEP and  
41 early growth when compared with generations born 20 years ago.  
42  
43  
44  
45

46 Plausible biological mechanisms, linked to modifiable factors, have been proposed for the  
47 observed association between lower SEP and length growth in the first five postnatal  
48 months. Breastfeeding and maternal smoking are two commonly proposed mechanisms,  
49 although evidence is limited. In our sample, breastfeeding was close to universal (37,38)  
50 and not associated with infant weight change in the first year. We did not evaluate  
51 maternal smoking in this study given the large proportion of missing information.  
52 However, prior studies did not find that either prenatal or postnatal maternal smoking  
53 substantially altered the association between SEP and growth (11,12,16).  
54  
55  
56  
57  
58  
59  
60

1  
2  
3 Maternal age was the only sociodemographic predictor positively associated with the  
4 unadjusted SITAR size growth parameter for weight. This was similarly reported in  
5 another cohort from the same geographic area of Santiago, Chile, the Growth and Obesity  
6 Cohort Study (GOCS) (13), which started a decade later and studied ages between birth and  
7 2 years. Our findings add to this work. Through our intense focus on the first five postnatal  
8 months, our results demonstrate that the association between SEP and weight growth  
9 appears earlier in the postnatal period than previously documented.  
10  
11

12 Other potential mechanisms relating to SEP could include gestational weight gain and  
13 maternal nutrient status. Size at birth, considered a proxy for these two factors and  
14 represented in these analyses by the size SITAR parameter, was not associated with any of  
15 the sociodemographic measures. Further research will be useful in clarifying the biological  
16 mechanisms behind the association between SEP and early infant growth.  
17  
18

19 Strengths of this study include the combination of an analytic approach to growth that  
20 better captures the nonlinear characteristic of growth in the first five months of life with a  
21 detailed measure of socioeconomic position appropriate to the context of a lower income  
22 setting. Another strength is the monthly anthropometric measures collected in the first five  
23 postnatal months. We also note several limitations. The sample size ( $n = 1,412$ ) is smaller  
24 than other studies with sample sizes in the thousands or tens of thousands (5,13,14). Our  
25 study, therefore, may not have been powered to detect some effects reported in larger  
26 studies. Another limitation is that the Graffar index, developed to assess differences in low-  
27 to middle-income populations, limits the generalizability of our findings to higher income  
28 groups.  
29  
30

31 This investigation examined various growth characteristics from birth to five months and  
32 their association with sociodemographic factors in a Chilean infancy cohort. We found  
33 associations between lower SEP and slower length (linear) growth, which are similar in  
34 direction to previous findings for maternal education that span periods of time greater  
35 than the first six months and up to five years of age (7,8,10,12). The association between  
36 maternal age and weight size, in our study, was similar to findings in other studies of  
37 growth between birth and two years of age (13). In sum, our results extend findings from  
38 previous research by showing that sociodemographic factors affect infant growth even in  
39 the first five months of growth and in relatively homogenous low- to middle-income  
40 populations.  
41  
42  
43  
44

## 45 Acknowledgements

46  
47 We thank the Santiago Longitudinal Study participants.  
48  
49

## 50 Contributors

51  
52  
53 AVH designed the study, conducted the data analysis, and wrote the first draft of the paper.  
54 KEN and SG supervised and contributed to the study design, interpretation of results, and  
55 draft revisions. EB helped acquire the data. All authors  
56  
57

(AVH,KEN,SG,RB,EB,BL,AGH,AJ,MG,VSV) both contributed to revisions of the draft for intellectual content and approved the final version of the manuscript.

## Funding

AVH was supported by an American Heart Association Mid-Atlantic Affiliate predoctoral fellowship (award number 16PRE29200008). KEN was supported by AHA grant 15GRNT25880008. The data for this work was supported by grants from the National Institutes of Health R01-HL-088530 and R01-HD-033487.

## Competing interests

None declared.

## Patient consent

Not required.

## Ethics approval

The Santiago Longitudinal Study (SLS) had been approved by Institutional Review Boards from 1) University of Michigan Medical Center, Ann Arbor, 2) Institute of Nutrition and Food Technology (INTA), Chile and 3) University of California, San Diego. The Office of Human Research Ethics at the University of North Carolina, Chapel Hill exempted this current research using existing anonymous data from review under the 45 CFR 46.101(b) regulatory category.

## Data sharing agreement

No additional data are available.

## Disclaimer

AHA had no role in the study design, data collection, and analysis, decision to publish or preparation of the manuscript.

## References

1. Gillman MW. The first months of life: A critical period for development of obesity. *Am J Clin Nutr*. 2008 Jun;87(6):1587–9.
2. Leunissen RWJ. Timing and tempo of first-year rapid growth in relation to cardiovascular and metabolic risk profile in early adulthood. *JAMA*. 2009 Jun 3;301(21):2234.
3. Touwslager RN, Houben AJ, Tan FE, Gielen M, Zeegers MP, Stehouwer CD, et al. Growth and endothelial function in the first 2 years of life. *The Journal of Pediatrics*. 2015 Mar;166(3):666–671.e1.
4. Plagemann A, Harder T, Schellong K, Schulz S, Stupin JH. Early postnatal life as a critical time window for determination of long-term metabolic health. *Best Practice & Research Clinical Endocrinology & Metabolism*. 2012 Oct;26(5):641–53.
5. McCrory C, O’Leary N, Fraga S, Ribeiro AI, Barros H, Kartiosuo N, et al. Socioeconomic differences in children’s growth trajectories from infancy to early adulthood: Evidence from four european countries. *Journal of Epidemiology and Community Health*. 2017 Oct;71(10):981–9.
6. Murasko JE. Associations between household income, height and BMI in contemporary US children: Infancy through early childhood. *Annals of Human Biology*. 2014 Nov;41(6):488–96.
7. Howe LD, Tilling K, Galobardes B, Smith GD, Gunnell D, Lawlor DA. Socioeconomic differences in childhood growth trajectories: At what age do height inequalities emerge? *Journal of Epidemiology and Community Health*. 2012 Feb;66(2):143–8.
8. Patel R, Tilling K, Lawlor DA, Howe LD, Bogdanovich N, Matush L, et al. Socioeconomic differences in childhood length/height trajectories in a middle-income country: A cohort study. *BMC public health*. 2014;14(1):932.
9. Queiroz VA de O, Assis AMO, Pinheiro SMC, Junior H da CR. Predictors of linear growth in the first year of life of a prospective cohort of full term children with normal birth weight. *Jornal de Pediatria*. 2012 Feb 15;88(1):79–86.
10. Matijasevich A, Howe LD, Tilling K, Santos IS, Barros AJD, Lawlor DA. Maternal education inequalities in height growth rates in early childhood: 2004 pelotas birth cohort study: Inequalities in childhood height. *Paediatric and Perinatal Epidemiology*. 2012 May;26(3):236–49.
11. Herngreen W, Buuren S van, Wieringen J van, Reerink J, Verloove-Vanhorick S, Ruys J. Growth in length and weight from birth to 2 years of a representative sample of netherlands children (born in 1988–89) related to socioeconomic status and other background characteristics. *Annals of Human Biology*. 1994 Jan;21(5):449–63.
12. Silva LM, Rossem L van, Jansen PW, Hokken-Koelega ACS, Moll HA, Hofman A, et al. Children of low socioeconomic status show accelerated linear growth in early childhood; results from the generation r study. Wang G, editor. *PLoS ONE*. 2012 May 23;7(5):e37356.

13. Pizzi C, Cole TJ, Richiardi L, dos-Santos-Silva I, Corvalan C, De Stavola B. Prenatal influences on size, velocity and tempo of infant growth: Findings from three contemporary cohorts. Wang G, editor. PLoS ONE. 2014 Feb 27;9(2):e90291.
14. Hui L, Leung GM, Cowling BJ, Lam T, Schooling CM. Determinants of infant growth: Evidence from hong kong's "children of 1997" birth cohort. *Annals of Epidemiology*. 2010 Nov;20(11):827–35.
15. Fuemmeler BF, Wang L, Iversen ES, Maguire R, Murphy SK, Hoyo C. Association between prepregnancy body mass index and gestational weight gain with size, tempo, and velocity of infant growth: Analysis of the newborn epigenetic study cohort. *Childhood Obesity*. 2016 Jun;12(3):210–8.
16. Wijlaars LPMM, Johnson L, Jaarsveld CHM van, Wardle J. Socioeconomic status and weight gain in early infancy. *International Journal of Obesity*. 2011 Jul;35(7):963–70.
17. Lejarraga H. Growth in infancy and childhood. In: *Human growth and development*. Elsevier; 2012. pp. 23–56.
18. Lozoff B, De Andraca I, Castillo M, Smith JB, Walter T, Pino P. Behavioral and developmental effects of preventing iron-deficiency anemia in healthy full-term infants. *Pediatrics*. 2003 Oct;112(4):846–54.
19. Lozoff B, Kaciroti N, Walter T. Iron deficiency in infancy: Applying a physiologic framework for prediction. *The American journal of clinical nutrition*. 2006;84(6):1412–21.
20. Graffar M. Une methode de classification sociales d'echantillons de population. *Courrier*. 1956;6:445–59.
21. Alvarez ML, Muzzo S, Ivanović D. Scale for measurement of socioeconomic level, in the health area. *Rev Med Chil*. 1985 Mar;113(3):243–9.
22. Cole TJ, Donaldson MDC, Ben-Shlomo Y. SITAR – a useful instrument for growth curve analysis. *International Journal of Epidemiology*. 2010 Jul 20;39(6):1558–66.
23. Beath KJ. Infant growth modelling using a shape invariant model with random effects. *Statistics in Medicine*. 2007 May 30;26(12):2547–64.
24. Pinheiro J, Bates D, DebRoy S, Sarkar D, R Core Team. *Nlme: Linear and nonlinear mixed effects models* [Internet]. 2017.
25. Tibshirani R. Regression shrinkage and selection via the lasso: A retrospective. *Journal of the Royal Statistical Society: Series B (Statistical Methodology)*. 2011 Jun 1;73(3):273–82.
26. Greenland S. Invited commentary: Variable selection versus shrinkage in the control of multiple confounders. *American Journal of Epidemiology*. 2007 Dec 12;167(5):523–9.
27. Harrell FE. *Regression modeling strategies: With applications to linear models, logistic and ordinal regression, and survival analysis* [Internet]. 2015.

- 1  
2  
3 28. Hastie T, Tibshirani R, Friedman JH. The elements of statistical learning: Data mining,  
4 inference, and prediction. Second edition, corrected at 12th printing 2017. New York:  
5 Springer; 2017. 745 pp. (Springer series in statistics).  
6  
7 29. Friedman J, Hastie T, Tibshirani R. Regularization paths for generalized linear models  
8 via coordinate descent. *Journal of Statistical Software*. 2010;33(1):1–22.  
9  
10 30. Tibshirani R, Tibshirani R, Taylor J, Loftus J, Reid S. selectiveInference: Tools for post-  
11 selection inference [Internet]. 2017.  
12  
13 31. Cole TJ, Altman DG. Statistics notes: Percentage differences, symmetry, and natural  
14 logarithms. *BMJ*. 2017 Aug 16;j3683.  
15  
16 32. Cole T, Kuh D, Johnson W, Ward K, Howe L, Adams J, et al. Using super-imposition by  
17 translation and rotation (SITAR) to relate pubertal growth to bone health in later life: The  
18 medical research council (MRC) national survey of health and development. *International*  
19 *Journal of Epidemiology*. 2016 Jul 27;dyw134.  
20  
21 33. Jimenez J, Romero MI. Reducing infant mortality in chile: Success in two phases. *Health*  
22 *Affairs*. 2007 Mar 1;26(2):458–65.  
23  
24 34. Gitlin LN, Fuentes P. The republic of chile: An upper middle-income country at the  
25 crossroads of economic development and aging. *The Gerontologist*. 2012 Jun 1;52(3):297–  
26 305.  
27  
28 35. Albala C, Vio F, Kain J, Uauy R. Nutrition transition in latin america: The case of chile.  
29 *Nutr Rev*. 2001 Jun;59(6):170–6.  
30  
31 36. Albala C, Vio F, Kain J, Uauy R. Nutrition transition in chile: Determinants and  
32 consequences. *Public Health Nutrition*. 2002 Feb;5(1).  
33  
34 37. Kang Sim DE, Cappiello M, Castillo M, Lozoff B, Martinez S, Blanco E, et al. Postnatal  
35 growth patterns in a chilean cohort: The role of SES and family environment. *International*  
36 *Journal of Pediatrics*. 2012;2012:1–8.  
37  
38 38. Khuc K, Blanco E, Burrows R, Reyes M, Castillo M, Lozoff B, et al. Adolescent metabolic  
39 syndrome risk is increased with higher infancy weight gain and decreased with longer  
40 breast feeding. *International Journal of Pediatrics*. 2012;2012:1–6.  
41  
42  
43  
44  
45  
46  
47  
48  
49  
50  
51  
52  
53  
54  
55  
56  
57  
58  
59  
60

Table 1. Descriptive statistics of sociodemographic characteristics, median [IQR]

| Characteristic             | Male              | Female            | Total             |
|----------------------------|-------------------|-------------------|-------------------|
| n                          | 747               | 665               | 1412              |
| Gestational age (weeks)    | 40.0 [39.0, 40.0] | 40.0 [39.0, 40.0] | 40.0 [39.0, 40.0] |
| Graffar Index              | 27.0 [23.0, 33.0] | 27.0 [23.0, 33.0] | 27.0 [23.0, 33.0] |
| Maternal age (years)       | 26.0 [21.8, 30.9] | 25.5 [21.7, 30.3] | 25.8 [21.8, 30.8] |
| Maternal Education (years) | 10.0 [8.0, 12.0]  | 10.0 [8.0, 12.0]  | 10.0 [8.0, 12.0]  |

view only



Table 2: Sociodemographic predictors and association with weight SITAR growth parameter<sup>a,b</sup>, stratified by sex of child in the Santiago Longitudinal Study, 1991-1996

| Characteristic             | Males                   |                                                 |                        |                        |                                                 |                        | Females                                      |                                                 |                                                 |                        |                                                 |                         | Total                                        |                                                 |                         |                        |                                                 |                        |
|----------------------------|-------------------------|-------------------------------------------------|------------------------|------------------------|-------------------------------------------------|------------------------|----------------------------------------------|-------------------------------------------------|-------------------------------------------------|------------------------|-------------------------------------------------|-------------------------|----------------------------------------------|-------------------------------------------------|-------------------------|------------------------|-------------------------------------------------|------------------------|
|                            | Unadjusted              |                                                 |                        | Adjusted <sup>c</sup>  |                                                 |                        | Unadjusted                                   |                                                 |                                                 | Adjusted <sup>c</sup>  |                                                 |                         | Unadjusted                                   |                                                 |                         | Adjusted <sup>c</sup>  |                                                 |                        |
|                            | Size                    | Tempo                                           | Velocity               | Size                   | Tempo                                           | Velocity               | Size                                         | Tempo                                           | Velocity                                        | Size                   | Tempo                                           | Velocity                | Size                                         | Tempo                                           | Velocity                | Size                   | Tempo                                           | Velocity               |
| Gest age                   | 0.59<br>(-0.12, 1.31)   | <b>-2.28</b><br>( <b>-3.15</b> , <b>-1.41</b> ) | -0.81<br>(-2.28, 0.66) | NA                     | <b>-1.96</b><br>( <b>-3.15</b> , <b>-1.40</b> ) | NA                     | 0.76<br>(-0.02, 1.54)                        | <b>-2.38</b><br>( <b>-3.32</b> , <b>-1.45</b> ) | -2.14<br>(-3.87, -0.42)                         | 0.45<br>(-0.32, 0.88)  | <b>-2.23</b><br>( <b>-3.35</b> , <b>-1.47</b> ) | -1.58<br>(-3.85, 0.08)  | 0.64<br>(0.10, 1.18)                         | <b>-2.35</b><br>( <b>-2.98</b> , <b>-1.71</b> ) | -1.53<br>(-2.70, -0.37) | 0.53<br>(-0.05, 1.15)  | <b>-2.01</b><br>( <b>-2.98</b> , <b>-1.70</b> ) | -1.06<br>(-2.67, 0.01) |
| Maternal age               | 0.11<br>(-0.00, 0.23)   | -0.06<br>(-0.20, 0.09)                          | -0.07<br>(-0.31, 0.17) | 0.07<br>(-0.11, 0.21)  | -0.06<br>(-0.21, 0.26)                          | -0.06<br>(-0.33, 0.82) | <b>0.21</b><br>( <b>0.07</b> , <b>0.34</b> ) | -0.02<br>(-0.18, 0.15)                          | <b>-0.41</b><br>( <b>-0.71</b> , <b>-0.12</b> ) | 0.19<br>(-6.13, 0.22)  | 0.01<br>(-2.29, 0.13)                           | -0.36<br>(-0.67, -0.04) | <b>0.16</b><br>( <b>0.07</b> , <b>0.25</b> ) | -0.03<br>(-0.14, 0.07)                          | -0.20<br>(-0.39, -0.00) | 0.15<br>(-0.78, 0.22)  | -0.01<br>(-0.16, 0.83)                          | -0.18<br>(-0.56, 0.22) |
| Maternal education         | -0.03<br>(-0.32, 0.26)  | 0.14<br>(-0.21, 0.49)                           | -0.04<br>(-0.62, 0.55) | NA                     | NA                                              | NA                     | -0.01<br>(-0.31, 0.29)                       | 0.06<br>(-0.30, 0.43)                           | -0.03<br>(-0.69, 0.64)                          | 0.00<br>(-Inf, -0.41)  | 0.12<br>(-0.95, 0.52)                           | NA                      | -0.03<br>(-0.24, 0.19)                       | 0.10<br>(-0.15, 0.36)                           | -0.04<br>(-0.50, 0.41)  | 0.00<br>(-10.67, 0.04) | 0.04<br>(-1.59, 1.58)                           | -0.05<br>(-0.75, 4.42) |
| Graffar Index <sup>d</sup> | -0.12<br>(-0.23, -0.01) | -0.13<br>(-0.27, 0.01)                          | -0.15<br>(-0.39, 0.08) | -0.08<br>(-0.22, 0.07) | -0.13<br>(-0.28, 0.03)                          | -0.13<br>(-0.41, 0.28) | -0.07<br>(-0.19, 0.06)                       | 0.12<br>(-0.03, 0.28)                           | 0.28<br>(0.00, 0.57)                            | -0.03<br>(-5.15, 0.23) | 0.13<br>(-0.24, 0.29)                           | 0.23<br>(-0.16, 0.52)   | -0.09<br>(-0.18, -0.00)                      | -0.01<br>(-0.11, 0.09)                          | 0.06<br>(-0.12, 0.25)   | -0.06<br>(-0.83, 0.04) | -0.00<br>(-0.06, 3.49)                          | 0.02<br>(-1.66, 0.32)  |

<sup>a</sup> Size units are percentage change in log(weight) from average, tempo units are time (days), velocity units in percent change from average.

<sup>b</sup> Bold values indicate significance with Bonferroni correction at alpha level of 0.05

<sup>c</sup> Adjusted linear regression models only include non-zero coefficients from lasso regression models that include all covariates in full model.

<sup>d</sup> Higher Graffar index values indicate lower socioeconomic status.

Table 3: Sociodemographic predictors and association with length SITAR growth parameters<sup>a,b</sup>, stratified by sex of child in the Santiago Longitudinal Study, 1991-1996

| Characteristic             | Males                          |                                |                                |                                | Females                        |                                |                                |                                | Both                           |                                |                                |                                |
|----------------------------|--------------------------------|--------------------------------|--------------------------------|--------------------------------|--------------------------------|--------------------------------|--------------------------------|--------------------------------|--------------------------------|--------------------------------|--------------------------------|--------------------------------|
|                            | Unadjusted                     |                                | Adjusted <sup>c</sup>          |                                | Unadjusted                     |                                | Adjusted <sup>c</sup>          |                                | Unadjusted                     |                                | Adjusted <sup>c</sup>          |                                |
|                            | Tempo                          | Velocity                       |
| Gest age                   | <b>-3.33</b><br>(-4.09, -2.56) | <b>0.99</b><br>(0.29, 1.68)    | <b>-3.05</b><br>(-4.10, -2.55) | NA                             | <b>-2.57</b><br>(-3.36, -1.79) | 0.25<br>(-0.52, 1.02)          | <b>-2.53</b><br>(-3.33, -1.77) | NA                             | <b>-2.97</b><br>(-3.52, -2.42) | <b>0.64</b><br>(0.12, 1.15)    | <b>-2.94</b><br>(-3.51, -2.41) | <b>0.61</b><br>(0.06, 1.15)    |
| Maternal age               | -0.04<br>(-0.18, 0.09)         | 0.09<br>(-0.03, 0.20)          | -0.01<br>(-0.10, 1.64)         | NA                             | <b>-0.17</b><br>(-0.30, -0.03) | 0.01<br>(-0.13, 0.14)          | -0.15<br>(-0.29, 0.01)         | NA                             | -0.10<br>(-0.19, -0.00)        | 0.05<br>(-0.04, 0.14)          | -0.07<br>(-0.17, 0.06)         | 0.02<br>(-0.35, 0.10)          |
| Maternal education         | 0.06<br>(-0.26, 0.38)          | 0.12<br>(-0.16, 0.40)          | NA                             | NA                             | -0.18<br>(-0.49, 0.13)         | 0.28<br>(-0.01, 0.58)          | -0.14<br>(-0.45, 0.52)         | 0.16<br>(-0.35, 0.52)          | -0.05<br>(-0.28, 0.17)         | 0.20<br>(-0.00, 0.40)          | -0.06<br>(-0.27, 0.73)         | 0.13<br>(-0.21, 0.34)          |
| Graffar Index <sup>d</sup> | 0.06<br>(-0.06, 0.19)          | <b>-0.26</b><br>(-0.37, -0.15) | 0.05<br>(-0.25, 0.36)          | <b>-0.21</b><br>(-0.37, -0.14) | <b>0.16</b><br>(0.03, 0.29)    | <b>-0.19</b><br>(-0.32, -0.07) | 0.13<br>(-0.03, 0.26)          | <b>-0.17</b><br>(-0.31, -0.05) | <b>0.11</b><br>(0.02, 0.20)    | <b>-0.23</b><br>(-0.31, -0.15) | 0.09<br>(-0.02, 0.18)          | <b>-0.22</b><br>(-0.31, -0.13) |

<sup>a</sup> Size units are percentage change in log(length) from average, tempo units are time (days), velocity units in percent change from average

<sup>b</sup> Bold values indicate significance with Bonferroni correction at alpha level of 0.05.

<sup>c</sup> Adjusted linear regression models only include non-zero coefficients from lasso regression models that include all covariates in full model.

<sup>d</sup> Higher Graffar index values indicate lower socioeconomic status.

Table 4: Sociodemographic predictors and association with weight-for-length (WFL) SITAR growth parameters<sup>a,b,c</sup> stratified by sex of child in the Santiago Longitudinal Study, 1991-1996

| Characteristic             | Males                  |                                                 |                        |                                                 | Females                |                                                 |                       |                                                 | Both                   |                                                 |                       |                                                 |
|----------------------------|------------------------|-------------------------------------------------|------------------------|-------------------------------------------------|------------------------|-------------------------------------------------|-----------------------|-------------------------------------------------|------------------------|-------------------------------------------------|-----------------------|-------------------------------------------------|
|                            | Unadjusted             |                                                 | Adjusted               |                                                 | Unadjusted             |                                                 | Adjusted              |                                                 | Unadjusted             |                                                 | Adjusted              |                                                 |
|                            | Size                   | Tempo                                           | Size                   | Tempo                                           | Size                   | Tempo                                           | Size                  | Tempo                                           | Size                   | Tempo                                           | Size                  | Tempo                                           |
| Gest age                   | 0.09<br>(-0.55, 0.73)  | <b>-2.03</b><br>( <b>-2.91</b> , <b>-1.15</b> ) | NA                     | <b>-1.58</b><br>( <b>-2.90</b> , <b>-1.11</b> ) | 0.05<br>(-0.58, 0.69)  | <b>-2.34</b><br>( <b>-3.35</b> , <b>-1.32</b> ) | NA                    | <b>-2.32</b><br>( <b>-3.35</b> , <b>-1.33</b> ) | 0.07<br>(-0.38, 0.52)  | <b>-2.17</b><br>( <b>-2.84</b> , <b>-1.51</b> ) | NA                    | <b>-1.99</b><br>( <b>-2.83</b> , <b>-1.19</b> ) |
| Maternal age               | 0.07<br>(-0.03, 0.18)  | -0.09<br>(-0.23, 0.06)                          | 0.04<br>(-0.23, 0.16)  | -0.08<br>(-0.24, 0.17)                          | 0.02<br>(-0.09, 0.13)  | -0.18<br>(-0.36, -0.00)                         | NA                    | -0.13<br>(-0.36, 0.14)                          | 0.05<br>(-0.03, 0.12)  | -0.13<br>(-0.24, -0.02)                         | 0.03<br>(-0.16, 0.12) | -0.11<br>(-0.22, 0.03)                          |
| Maternal education         | -0.09<br>(-0.35, 0.16) | 0.08<br>(-0.27, 0.44)                           | NA                     | NA                                              | -0.10<br>(-0.35, 0.14) | 0.00<br>(-0.40, 0.40)                           | NA                    | 0.07<br>(-2.11, 0.42)                           | -0.10<br>(-0.28, 0.08) | 0.04<br>(-0.22, 0.31)                           | NA                    | NA                                              |
| Graffar Index <sup>d</sup> | -0.08<br>(-0.18, 0.02) | -0.07<br>(-0.21, 0.07)                          | -0.05<br>(-0.17, 0.15) | -0.08<br>(-0.24, 0.17)                          | 0.08<br>(-0.02, 0.19)  | <b>0.26</b><br>( <b>0.10</b> , <b>0.43</b> )    | 0.04<br>(-0.21, 0.18) | <b>0.25</b><br>( <b>0.05</b> , <b>0.42</b> )    | -0.01<br>(-0.08, 0.07) | 0.08<br>(-0.03, 0.19)                           | NA                    | 0.06<br>(-0.14, 0.17)                           |

<sup>a</sup> Size units are percentage change in log(WFL) from average, tempo units are time (days), velocity units in percent change from average.

<sup>b</sup> Bold values indicate significance with Bonferroni correction at alpha level of 0.05.

<sup>c</sup> Adjusted linear regression models only include non-zero coefficients from lasso

regression models that include all covariates in full model.

<sup>d</sup> Higher Graffar index values indicate lower socioeconomic status

1  
2  
3  
4  
5  
6 Figure 1 caption: Type of change in random effects relative to the sample mean trajectory in  
7 weight growth curve trajectories following a shape invariant model (SIM).  
8  
9  
10  
11  
12  
13  
14  
15  
16  
17  
18  
19  
20  
21  
22  
23  
24  
25  
26  
27  
28  
29  
30  
31  
32  
33  
34  
35  
36  
37  
38  
39  
40  
41  
42  
43  
44  
45  
46  
47  
48  
49  
50  
51  
52  
53  
54  
55  
56  
57  
58  
59  
60

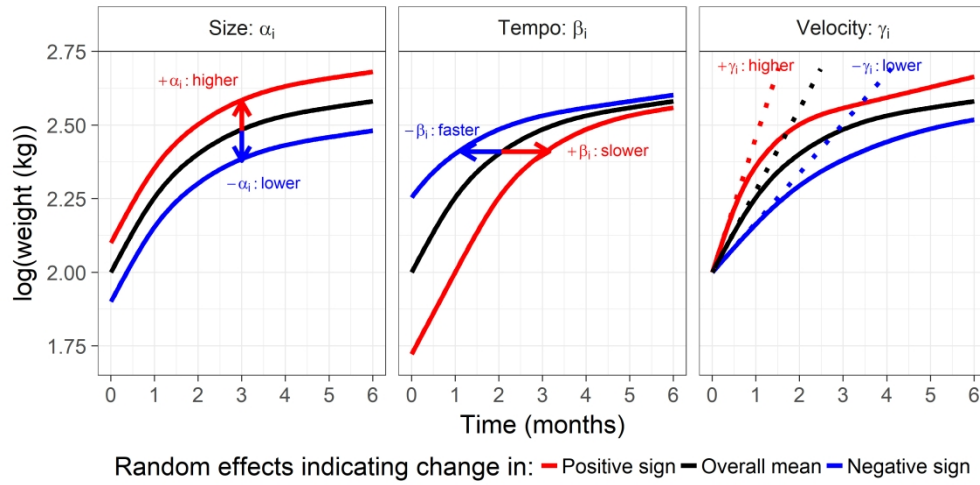

Figure 1. Type of change in random effects relative to the sample mean trajectory in weight growth curve trajectories following a shape invariant model (SIM).

Appendix Table 1. Description of items used for Graffar index

| Graffar item                                      | Scale                                  | n(%)        |
|---------------------------------------------------|----------------------------------------|-------------|
| N                                                 |                                        | 1412        |
| No. people in hh 'eating from 1 pot' (%)          | 1: 1-3                                 | 230 (16.3)  |
|                                                   | 2: 4-6                                 | 865 (61.3)  |
|                                                   | 3: 7-9                                 | 254 (18.0)  |
|                                                   | 4: 10-12                               | 55 ( 3.9)   |
|                                                   | 5: 13-15                               | 6 ( 0.4)    |
|                                                   | 6: over 16                             | 2 ( 0.1)    |
| Father's presence in household (%)                | 1: father is present; not left hh      | 1197 (84.8) |
|                                                   | 3: left hh but sends money             | 66 ( 4.7)   |
|                                                   | 4: partially left hh                   | 38 ( 2.7)   |
|                                                   | 6: completely gone                     | 111 ( 7.9)  |
| Head of household's highest educational level (%) | 1: university completed                | 12 ( 0.9)   |
|                                                   | 2: university not completed            | 9 ( 0.6)    |
|                                                   | 3: h.s. or technical studies completed | 325 (23.0)  |
|                                                   | 4: completed 8th grade                 | 664 (47.1)  |
|                                                   | 5: did not reach 8th grade             | 382 (27.1)  |
|                                                   | 6: no schooling                        | 19 ( 1.3)   |
| Property ownership (%)                            | 1: owned                               | 269 (19.1)  |
|                                                   | 2: home mortgage                       | 83 ( 5.9)   |
|                                                   | 3: rent                                | 243 (17.2)  |
|                                                   | 4: given to you as a gift              | 117 ( 8.3)  |
|                                                   | 5: squatters w tents or construction   | 7 ( 0.5)    |
|                                                   | 6: living in back of main house        | 693 (49.1)  |
| Type of house construction (%)                    | 1: very large house                    | 15 ( 1.1)   |
|                                                   | 2: smaller house                       | 181 (12.8)  |
|                                                   | 3: tiny concrete house                 | 330 (23.4)  |

Appendix Table 1. Description of items used for Graffar index

| Graffar item                                                                                 | Scale                                    | n(%)        |
|----------------------------------------------------------------------------------------------|------------------------------------------|-------------|
|                                                                                              | 4: self-constructed home                 | 398 (28.2)  |
|                                                                                              | 5: wooden house                          | 94 ( 6.7)   |
|                                                                                              | 6: wooden house w/ less than three rooms | 394 (27.9)  |
| Characteristics of the kitchen (%)                                                           | 1: independent kitchen in one room       | 931 (65.9)  |
|                                                                                              | 6: kitchen in a room with multiple uses  | 481 (34.1)  |
| Sewage,plumbing (%)                                                                          | 1: inside plumbing                       | 1402 (99.3) |
|                                                                                              | 5: out house                             | 9 ( 0.6)    |
|                                                                                              | 6: just go in woods                      | 1 ( 0.1)    |
| Water (%)                                                                                    | 1: water from inside home faucet         | 949 (67.2)  |
|                                                                                              | 6: water from outside faucet             | 463 (32.8)  |
| No. times garbage collected per week (%)                                                     | 1: more than 4x/week                     | 6 ( 0.4)    |
|                                                                                              | 2: 3 times/week                          | 1288 (91.2) |
|                                                                                              | 3: 2 times/week                          | 117 ( 8.3)  |
|                                                                                              | 6: never                                 | 1 ( 0.1)    |
| Total count of previous six goods,possession (tv, washing machine, stereo, refrig., car) (%) | 1: 13-15 (own all six goods)             | 77 ( 5.5)   |
|                                                                                              | 2: 10-12                                 | 311 (22.3)  |
|                                                                                              | 3: 7-9                                   | 302 (21.6)  |
|                                                                                              | 4: 4-6                                   | 277 (19.9)  |
|                                                                                              | 5: 1-3                                   | 374 (26.8)  |
|                                                                                              | 6: 0                                     | 54 ( 3.9)   |

Appendix Table 2: Nonlinear mixed effects model fit evaluation: BIC for all evaluated models

| Trajectory type | Model ID          | Model description                                          | BIC <sup>a</sup> |
|-----------------|-------------------|------------------------------------------------------------|------------------|
|                 | no random effects | no random effects                                          | NA               |
|                 | m2                | random size (alpha0)                                       | -19546.4         |
|                 | m3                | random tempo (beta0)                                       | -17232           |
|                 | m4                | random velocity (beta1)                                    | -18323           |
|                 | m5                | random tempo and velocity (beta0 and beta1)                | -21901.5         |
|                 | m5.strat          | m5 + sex-spec effects                                      | -22123.4         |
|                 | m5.strat2         | m5.strat + sex-spec corr structure                         | -22107.5         |
|                 | m6                | random size and tempo (alpha0 and beta0)                   | -21740.4         |
|                 | m7                | random size and velocity (alpha0 and beta1)                | -21629.8         |
| Weight          | m8                | random size, tempo and velocity (alpha0, beta0, and beta1) | <b>-22940.66</b> |
|                 | no random effects | no random effects                                          | NA               |
|                 | m2                | random size (alpha0)                                       | -37399.5         |
|                 | m3                | random tempo (beta0)                                       | -36684.1         |
|                 | m4                | random velocity (beta1)                                    | -34985.7         |
|                 | m5                | random tempo and velocity (beta0 and beta1)                | -37820           |
|                 | m5.strat          | m5 + sex-spec effects                                      | <b>-38000.74</b> |
|                 | m5.strat2         | m5.strat + sex-spec corr structure                         | -37978.2         |
|                 | m6                | random size and tempo (alpha0 and beta0)                   | -37381.5         |
|                 | m7                | random size and velocity (alpha0 and beta1)                | -37819.9         |
| Height          | no random effects | no random effects                                          | NA               |
|                 | m2                | random size (alpha0)                                       | -21147.2         |
|                 | m3                | random tempo (beta0)                                       | -18852.1         |
|                 | m4                | random velocity (beta1)                                    | -20549.9         |
|                 | m5                | random tempo and velocity (beta0 and beta1)                | -22598           |
|                 | m5.strat          | m5 + sex-spec effects                                      | -22761.2         |
|                 | m5.strat2         | m5.strat + sex-spec corr structure                         | -22751.3         |
|                 | m6                | random size and tempo (alpha0 and beta0)                   | <b>-22808.5</b>  |
|                 | m7                | random size and velocity (alpha0 and beta1)                | -22484.6         |
| WFL             |                   |                                                            |                  |

<sup>a</sup>Bold values indicate lowest value within a trajectory evaluation.



# Reporting checklist for cohort study.

Based on the STROBE cohort guidelines.

## Instructions to authors

Complete this checklist by entering the page numbers from your manuscript where readers will find each of the items listed below.

Your article may not currently address all the items on the checklist. Please modify your text to include the missing information. If you are certain that an item does not apply, please write "n/a" and provide a short explanation.

Upload your completed checklist as an extra file when you submit to a journal.

In your methods section, say that you used the STROBE cohort reporting guidelines, and cite them as:

von Elm E, Altman DG, Egger M, Pocock SJ, Gøtzsche PC, Vandenbroucke JP. The Strengthening the Reporting of Observational Studies in Epidemiology (STROBE) Statement: guidelines for reporting observational studies.

|                           |                                                                                                        | Page   |
|---------------------------|--------------------------------------------------------------------------------------------------------|--------|
|                           | Reporting Item                                                                                         | Number |
| <b>Title and abstract</b> |                                                                                                        |        |
| Title                     | <a href="#">#1a</a> Indicate the study's design with a commonly used term in the title or the abstract | 1      |

|    |                      |                     |                                                                 |    |
|----|----------------------|---------------------|-----------------------------------------------------------------|----|
| 1  | Abstract             | <a href="#">#1b</a> | Provide in the abstract an informative and balanced summary     | 3  |
| 2  |                      |                     | of what was done and what was found                             |    |
| 3  |                      |                     |                                                                 |    |
| 4  |                      |                     |                                                                 |    |
| 5  |                      |                     |                                                                 |    |
| 6  | <b>Introduction</b>  |                     |                                                                 |    |
| 7  |                      |                     |                                                                 |    |
| 8  |                      |                     |                                                                 |    |
| 9  |                      |                     |                                                                 |    |
| 10 | Background /         | <a href="#">#2</a>  | Explain the scientific background and rationale for the         | 4  |
| 11 | rationale            |                     | investigation being reported                                    |    |
| 12 |                      |                     |                                                                 |    |
| 13 |                      |                     |                                                                 |    |
| 14 |                      |                     |                                                                 |    |
| 15 | Objectives           | <a href="#">#3</a>  | State specific objectives, including any prespecified           | 4  |
| 16 |                      |                     | hypotheses                                                      |    |
| 17 |                      |                     |                                                                 |    |
| 18 |                      |                     |                                                                 |    |
| 19 |                      |                     |                                                                 |    |
| 20 | <b>Methods</b>       |                     |                                                                 |    |
| 21 |                      |                     |                                                                 |    |
| 22 |                      |                     |                                                                 |    |
| 23 | Study design         | <a href="#">#4</a>  | Present key elements of study design early in the paper         | 5  |
| 24 |                      |                     |                                                                 |    |
| 25 |                      |                     |                                                                 |    |
| 26 | Setting              | <a href="#">#5</a>  | Describe the setting, locations, and relevant dates, including  | 5  |
| 27 |                      |                     | periods of recruitment, exposure, follow-up, and data           |    |
| 28 |                      |                     | collection                                                      |    |
| 29 |                      |                     |                                                                 |    |
| 30 |                      |                     |                                                                 |    |
| 31 |                      |                     |                                                                 |    |
| 32 |                      |                     |                                                                 |    |
| 33 |                      |                     |                                                                 |    |
| 34 | Eligibility criteria | <a href="#">#6a</a> | Give the eligibility criteria, and the sources and methods of   | 5  |
| 35 |                      |                     | selection of participants. Describe methods of follow-up.       |    |
| 36 |                      |                     |                                                                 |    |
| 37 |                      |                     |                                                                 |    |
| 38 |                      |                     |                                                                 |    |
| 39 | Eligibility criteria | <a href="#">#6b</a> | For matched studies, give matching criteria and number of       | na |
| 40 |                      |                     | exposed and unexposed                                           |    |
| 41 |                      |                     |                                                                 |    |
| 42 |                      |                     |                                                                 |    |
| 43 |                      |                     |                                                                 |    |
| 44 |                      |                     |                                                                 |    |
| 45 | Variables            | <a href="#">#7</a>  | Clearly define all outcomes, exposures, predictors, potential   | 5  |
| 46 |                      |                     | confounders, and effect modifiers. Give diagnostic criteria, if |    |
| 47 |                      |                     | applicable                                                      |    |
| 48 |                      |                     |                                                                 |    |
| 49 |                      |                     |                                                                 |    |
| 50 |                      |                     |                                                                 |    |
| 51 |                      |                     |                                                                 |    |
| 52 |                      |                     |                                                                 |    |
| 53 | Data sources /       | <a href="#">#8</a>  | For each variable of interest give sources of data and details  | 5  |
| 54 | measurement          |                     | of methods of assessment (measurement). Describe                |    |
| 55 |                      |                     | comparability of assessment methods if there is more than       |    |
| 56 |                      |                     |                                                                 |    |
| 57 |                      |                     |                                                                 |    |
| 58 |                      |                     |                                                                 |    |
| 59 |                      |                     |                                                                 |    |
| 60 |                      |                     |                                                                 |    |

one group. Give information separately for for exposed and unexposed groups if applicable.

|    |                |                      |                                                               |    |
|----|----------------|----------------------|---------------------------------------------------------------|----|
| 1  |                |                      |                                                               |    |
| 2  |                |                      |                                                               |    |
| 3  |                |                      |                                                               |    |
| 4  |                |                      |                                                               |    |
| 5  |                |                      |                                                               |    |
| 6  | Bias           | <a href="#">#9</a>   | Describe any efforts to address potential sources of bias     | 6  |
| 7  |                |                      |                                                               |    |
| 8  |                |                      |                                                               |    |
| 9  | Study size     | <a href="#">#10</a>  | Explain how the study size was arrived at                     | 5  |
| 10 |                |                      |                                                               |    |
| 11 |                |                      |                                                               |    |
| 12 | Quantitative   | <a href="#">#11</a>  | Explain how quantitative variables were handled in the        | 6  |
| 13 |                |                      |                                                               |    |
| 14 | variables      |                      | analyses. If applicable, describe which groupings were        |    |
| 15 |                |                      |                                                               |    |
| 16 |                |                      |                                                               |    |
| 17 |                |                      | chosen, and why                                               |    |
| 18 |                |                      |                                                               |    |
| 19 |                |                      |                                                               |    |
| 20 | Statistical    | <a href="#">#12a</a> | Describe all statistical methods, including those used to     | 6  |
| 21 |                |                      |                                                               |    |
| 22 | methods        |                      | control for confounding                                       |    |
| 23 |                |                      |                                                               |    |
| 24 |                |                      |                                                               |    |
| 25 | Statistical    | <a href="#">#12b</a> | Describe any methods used to examine subgroups and            | na |
| 26 |                |                      |                                                               |    |
| 27 | methods        |                      | interactions                                                  |    |
| 28 |                |                      |                                                               |    |
| 29 |                |                      |                                                               |    |
| 30 | Statistical    | <a href="#">#12c</a> | Explain how missing data were addressed                       | 7  |
| 31 |                |                      |                                                               |    |
| 32 | methods        |                      |                                                               |    |
| 33 |                |                      |                                                               |    |
| 34 |                |                      |                                                               |    |
| 35 |                |                      |                                                               |    |
| 36 | Statistical    | <a href="#">#12d</a> | If applicable, explain how loss to follow-up was addressed    | na |
| 37 |                |                      |                                                               |    |
| 38 | methods        |                      |                                                               |    |
| 39 |                |                      |                                                               |    |
| 40 |                |                      |                                                               |    |
| 41 | Statistical    | <a href="#">#12e</a> | Describe any sensitivity analyses                             | na |
| 42 |                |                      |                                                               |    |
| 43 | methods        |                      |                                                               |    |
| 44 |                |                      |                                                               |    |
| 45 |                |                      |                                                               |    |
| 46 | <b>Results</b> |                      |                                                               |    |
| 47 |                |                      |                                                               |    |
| 48 |                |                      |                                                               |    |
| 49 | Participants   | <a href="#">#13a</a> | Report numbers of individuals at each stage of study—eg       | 7  |
| 50 |                |                      |                                                               |    |
| 51 |                |                      | numbers potentially eligible, examined for eligibility,       |    |
| 52 |                |                      |                                                               |    |
| 53 |                |                      | confirmed eligible, included in the study, completing follow- |    |
| 54 |                |                      |                                                               |    |
| 55 |                |                      |                                                               |    |
| 56 |                |                      |                                                               |    |
| 57 |                |                      |                                                               |    |
| 58 |                |                      |                                                               |    |
| 59 |                |                      |                                                               |    |
| 60 |                |                      |                                                               |    |

up, and analysed. Give information separately for for  
exposed and unexposed groups if applicable.

|    |                  |                      |                                                                   |     |
|----|------------------|----------------------|-------------------------------------------------------------------|-----|
| 1  |                  |                      |                                                                   |     |
| 2  |                  |                      |                                                                   |     |
| 3  |                  |                      |                                                                   |     |
| 4  |                  |                      |                                                                   |     |
| 5  |                  |                      |                                                                   |     |
| 6  | Participants     | <a href="#">#13b</a> | Give reasons for non-participation at each stage                  | 7   |
| 7  |                  |                      |                                                                   |     |
| 8  |                  |                      |                                                                   |     |
| 9  | Participants     | <a href="#">#13c</a> | Consider use of a flow diagram                                    | na  |
| 10 |                  |                      |                                                                   |     |
| 11 |                  |                      |                                                                   |     |
| 12 | Descriptive data | <a href="#">#14a</a> | Give characteristics of study participants (eg demographic,       | 7   |
| 13 |                  |                      |                                                                   |     |
| 14 |                  |                      | clinical, social) and information on exposures and potential      |     |
| 15 |                  |                      |                                                                   |     |
| 16 |                  |                      | confounders. Give information separately for exposed and          |     |
| 17 |                  |                      |                                                                   |     |
| 18 |                  |                      | unexposed groups if applicable.                                   |     |
| 19 |                  |                      |                                                                   |     |
| 20 |                  |                      |                                                                   |     |
| 21 |                  |                      |                                                                   |     |
| 22 | Descriptive data | <a href="#">#14b</a> | Indicate number of participants with missing data for each        | 7   |
| 23 |                  |                      |                                                                   |     |
| 24 |                  |                      | variable of interest                                              |     |
| 25 |                  |                      |                                                                   |     |
| 26 |                  |                      |                                                                   |     |
| 27 | Descriptive data | <a href="#">#14c</a> | Summarise follow-up time (eg, average and total amount)           | na  |
| 28 |                  |                      |                                                                   |     |
| 29 |                  |                      |                                                                   |     |
| 30 | Outcome data     | <a href="#">#15</a>  | Report numbers of outcome events or summary measures              | na  |
| 31 |                  |                      |                                                                   |     |
| 32 |                  |                      | over time. Give information separately for exposed and            |     |
| 33 |                  |                      |                                                                   |     |
| 34 |                  |                      | unexposed groups if applicable.                                   |     |
| 35 |                  |                      |                                                                   |     |
| 36 |                  |                      |                                                                   |     |
| 37 |                  |                      |                                                                   |     |
| 38 | Main results     | <a href="#">#16a</a> | Give unadjusted estimates and, if applicable, confounder-         | 7-8 |
| 39 |                  |                      |                                                                   |     |
| 40 |                  |                      | adjusted estimates and their precision (eg, 95% confidence        |     |
| 41 |                  |                      |                                                                   |     |
| 42 |                  |                      | interval). Make clear which confounders were adjusted for         |     |
| 43 |                  |                      |                                                                   |     |
| 44 |                  |                      | and why they were included                                        |     |
| 45 |                  |                      |                                                                   |     |
| 46 |                  |                      |                                                                   |     |
| 47 |                  |                      |                                                                   |     |
| 48 | Main results     | <a href="#">#16b</a> | Report category boundaries when continuous variables were         | na  |
| 49 |                  |                      |                                                                   |     |
| 50 |                  |                      | categorized                                                       |     |
| 51 |                  |                      |                                                                   |     |
| 52 |                  |                      |                                                                   |     |
| 53 | Main results     | <a href="#">#16c</a> | If relevant, consider translating estimates of relative risk into | na  |
| 54 |                  |                      |                                                                   |     |
| 55 |                  |                      | absolute risk for a meaningful time period                        |     |
| 56 |                  |                      |                                                                   |     |
| 57 |                  |                      |                                                                   |     |
| 58 |                  |                      |                                                                   |     |
| 59 |                  |                      |                                                                   |     |
| 60 |                  |                      |                                                                   |     |

|    |                          |                     |                                                                |     |
|----|--------------------------|---------------------|----------------------------------------------------------------|-----|
| 1  | Other analyses           | <a href="#">#17</a> | Report other analyses done—e.g., analyses of subgroups         | na  |
| 2  |                          |                     |                                                                |     |
| 3  |                          |                     | and interactions, and sensitivity analyses                     |     |
| 4  |                          |                     |                                                                |     |
| 5  |                          |                     |                                                                |     |
| 6  | <b>Discussion</b>        |                     |                                                                |     |
| 7  |                          |                     |                                                                |     |
| 8  |                          |                     |                                                                |     |
| 9  |                          |                     |                                                                |     |
| 10 | Key results              | <a href="#">#18</a> | Summarise key results with reference to study objectives       | 8-9 |
| 11 |                          |                     |                                                                |     |
| 12 |                          |                     |                                                                |     |
| 13 | Limitations              | <a href="#">#19</a> | Discuss limitations of the study, taking into account sources  | 10  |
| 14 |                          |                     |                                                                |     |
| 15 |                          |                     | of potential bias or imprecision. Discuss both direction and   |     |
| 16 |                          |                     |                                                                |     |
| 17 |                          |                     | magnitude of any potential bias.                               |     |
| 18 |                          |                     |                                                                |     |
| 19 |                          |                     |                                                                |     |
| 20 | Interpretation           | <a href="#">#20</a> | Give a cautious overall interpretation considering objectives, | 10  |
| 21 |                          |                     |                                                                |     |
| 22 |                          |                     | limitations, multiplicity of analyses, results from similar    |     |
| 23 |                          |                     |                                                                |     |
| 24 |                          |                     | studies, and other relevant evidence.                          |     |
| 25 |                          |                     |                                                                |     |
| 26 |                          |                     |                                                                |     |
| 27 |                          |                     |                                                                |     |
| 28 | Generalisability         | <a href="#">#21</a> | Discuss the generalisability (external validity) of the study  | 10  |
| 29 |                          |                     |                                                                |     |
| 30 |                          |                     | results                                                        |     |
| 31 |                          |                     |                                                                |     |
| 32 |                          |                     |                                                                |     |
| 33 | <b>Other Information</b> |                     |                                                                |     |
| 34 |                          |                     |                                                                |     |
| 35 |                          |                     |                                                                |     |
| 36 |                          |                     |                                                                |     |
| 37 | Funding                  | <a href="#">#22</a> | Give the source of funding and the role of the funders for the | 10  |
| 38 |                          |                     |                                                                |     |
| 39 |                          |                     | present study and, if applicable, for the original study on    |     |
| 40 |                          |                     |                                                                |     |
| 41 |                          |                     | which the present article is based                             |     |
| 42 |                          |                     |                                                                |     |
| 43 |                          |                     |                                                                |     |

44 The STROBE checklist is distributed under the terms of the Creative Commons Attribution License  
 45 CC-BY. This checklist was completed on 16. August 2019 using <https://www.goodreports.org/>, a tool  
 46 made by the [EQUATOR Network](#) in collaboration with [Penelope.ai](#)  
 47  
 48  
 49  
 50  
 51  
 52  
 53  
 54  
 55  
 56  
 57  
 58  
 59  
 60

# BMJ Open

## Sociodemographic predictors of early postnatal growth: evidence from a Chilean infancy cohort.

|                                 |                                                                                                                                                                                                                                                                                                                                                                                                                                                                                                                                                                                                                                                                                                                                                                                                                                                                        |
|---------------------------------|------------------------------------------------------------------------------------------------------------------------------------------------------------------------------------------------------------------------------------------------------------------------------------------------------------------------------------------------------------------------------------------------------------------------------------------------------------------------------------------------------------------------------------------------------------------------------------------------------------------------------------------------------------------------------------------------------------------------------------------------------------------------------------------------------------------------------------------------------------------------|
| Journal:                        | <i>BMJ Open</i>                                                                                                                                                                                                                                                                                                                                                                                                                                                                                                                                                                                                                                                                                                                                                                                                                                                        |
| Manuscript ID                   | bmjopen-2019-033695.R2                                                                                                                                                                                                                                                                                                                                                                                                                                                                                                                                                                                                                                                                                                                                                                                                                                                 |
| Article Type:                   | Original research                                                                                                                                                                                                                                                                                                                                                                                                                                                                                                                                                                                                                                                                                                                                                                                                                                                      |
| Date Submitted by the Author:   | 27-Feb-2020                                                                                                                                                                                                                                                                                                                                                                                                                                                                                                                                                                                                                                                                                                                                                                                                                                                            |
| Complete List of Authors:       | Von Holle, Ann; University of North Carolina at Chapel Hill, Epidemiology North, Kari; University of North Carolina at Chapel Hill<br>Gahagan, Sheila; University of California San Diego, Child Development and Community Health<br>Burrows, Raquel; University of Chile, Institute of Nutrition and Food Technology<br>Blanco, Estela; University of California San Diego, Child Development and Community Health<br>Lozoff, Betsy; University of Michigan, Department of Pediatrics<br>Howard, Annie Green; University of North Carolina System, Biostatistics<br>Justice, Anne; Geisinger Health, Center for Biomedical and Translational Informatics<br>Graff, Misa; University of North Carolina at Chapel Hill, Epidemiology<br>Voruganti, V. Saroja; University of North Carolina at Chapel Hill, Department of Nutrition and UNC Nutrition Research Institute |
| <b>Primary Subject Heading</b>: | Epidemiology                                                                                                                                                                                                                                                                                                                                                                                                                                                                                                                                                                                                                                                                                                                                                                                                                                                           |
| Secondary Subject Heading:      | Paediatrics                                                                                                                                                                                                                                                                                                                                                                                                                                                                                                                                                                                                                                                                                                                                                                                                                                                            |
| Keywords:                       | EPIDEMIOLOGY, PUBLIC HEALTH, Community child health < PAEDIATRICS                                                                                                                                                                                                                                                                                                                                                                                                                                                                                                                                                                                                                                                                                                                                                                                                      |
|                                 |                                                                                                                                                                                                                                                                                                                                                                                                                                                                                                                                                                                                                                                                                                                                                                                                                                                                        |

SCHOLARONE™  
Manuscripts



I, the Submitting Author has the right to grant and does grant on behalf of all authors of the Work (as defined in the below author licence), an exclusive licence and/or a non-exclusive licence for contributions from authors who are: i) UK Crown employees; ii) where BMJ has agreed a CC-BY licence shall apply, and/or iii) in accordance with the terms applicable for US Federal Government officers or employees acting as part of their official duties; on a worldwide, perpetual, irrevocable, royalty-free basis to BMJ Publishing Group Ltd ("BMJ") its licensees and where the relevant Journal is co-owned by BMJ to the co-owners of the Journal, to publish the Work in this journal and any other BMJ products and to exploit all rights, as set out in our [licence](#).

The Submitting Author accepts and understands that any supply made under these terms is made by BMJ to the Submitting Author unless you are acting as an employee on behalf of your employer or a postgraduate student of an affiliated institution which is paying any applicable article publishing charge ("APC") for Open Access articles. Where the Submitting Author wishes to make the Work available on an Open Access basis (and intends to pay the relevant APC), the terms of reuse of such Open Access shall be governed by a Creative Commons licence – details of these licences and which [Creative Commons](#) licence will apply to this Work are set out in our licence referred to above.

Other than as permitted in any relevant BMJ Author's Self Archiving Policies, I confirm this Work has not been accepted for publication elsewhere, is not being considered for publication elsewhere and does not duplicate material already published. I confirm all authors consent to publication of this Work and authorise the granting of this licence.

1  
2  
3  
4 Title: Sociodemographic predictors of early postnatal growth: evidence from a Chilean  
5 infancy cohort  
6  
7

8  
9 *Ann Von Holle*

10 PO Box 12233 Mail Drop A3-03, 111 TW Alexander Drive, Research Triangle Park, NC 27709-2233. Email:  
11 [avonholle@gmail.com](mailto:avonholle@gmail.com); tel. 919-593-0299  
12

13  
14 (Corresponding author)  
15

16  
17 *Kari E. North*

18  
19 Department of Epidemiology, University of North Carolina, Chapel Hill, NC, United States  
20  
21

22  
23 *Sheila Gahagan*

24 Academic General Pediatrics, Child Development and Community Health Division, University of California,  
25 San Diego, CA, United States  
26  
27

28  
29 *Raquel Burrows*

30 Institute of Nutrition and Food Technology, University of Chile, Santiago, Chile  
31  
32

33  
34 *Estela Blanco*

35 Child Development and Community Health Division; University of California, San Diego, CA, United States  
36  
37

38  
39 *Betsy Lozoff*

40 Department of Pediatrics, University of Michigan, Ann Arbor, MI, United States  
41  
42

43  
44 *Annie Green Howard*

45 Department of Biostatistics, University of North Carolina, Chapel Hill, NC, United States  
46  
47

48  
49 *Anne Justice*

50 Center for Biomedical and Translational Informatics, Geisinger Health, Danville, PA, United States  
51  
52

53  
54  
55 *Misa Graff*  
56  
57



1  
2  
3  
4  
5  
6  
7  
8  
9  
10  
11  
12  
13  
14  
15  
16  
17  
18  
19  
20  
21  
22  
23  
24  
25  
26  
27  
28  
29  
30  
31  
32  
33  
34  
35  
36  
37  
38  
39  
40  
41  
42  
43  
44  
45  
46  
47  
48  
49  
50  
51  
52  
53  
54  
55  
56  
57  
58  
59  
60

Department of Epidemiology, University of North Carolina, Chapel Hill, NC, United States

*Venkata Saroja Voruganti*

Department of Nutrition and UNC Nutrition Research Institute, University of North Carolina, Chapel Hill, NC, United States

Word Count: ~3,124

Number of references: 39

For peer review only

## Abstract

### Objectives

Infant anthropometric growth varies across socioeconomic factors, including maternal education and income, and may serve as an indicator of environmental influences in early life with long term health consequences. Previous research has identified sociodemographic gradients in growth with a focus on the first year and beyond, but estimates are sparse for growth before six months. Thus, our objective was to examine the relationship between sociodemographic factors and infant growth patterns between birth and five months of age.

### Design

Prospective cohort study

### Settings

Low- to middle-income neighborhoods in Santiago, Chile (1991-1996).

### Participants

1,412 participants from a randomized iron deficiency anemia preventive trial in healthy infants.

### Main outcome measures

Longitudinal anthropometrics including monthly weight (kg), length (cm) and weight-for-length (WFL) values. For each measure, we estimated three individual-level growth parameters (size, timing, and velocity) from SuperImposition by Translation and Rotation (SITAR) models. Size and timing changes represent vertical and horizontal growth curve shifts, respectively, and velocity change represents growth rate shifts. We estimated the linear association between growth parameters and gestational age, maternal age, education, and socioeconomic position (SEP).

### Results

Lower SEP was associated with a slower linear (length) velocity growth parameter (-0.22, 95% CI=-0.31,-0.13) – outcome units are percent change in velocity from the average growth curve. Lower SEP was associated with later WFL growth timing as demonstrated through the tempo growth parameter for females (0.25, 95% CI=0.05,0.42) – outcome units are shifts in days from the average growth curve. We found no evidence of associations between SEP and the weight size, timing, or velocity growth rate parameters.

### Conclusion

Previous research on growth in older infants and children shows associations between lower SEP with slower length velocity. We found evidence supporting this association in the first five months of life, which may inform age-specific prevention efforts aimed at infant length growth.

## Strengths and Limitations of this Study

- The sample includes monthly anthropometric measures in the first five postnatal months – not available in any study to date and allowing better fitting growth models.
- We used the Graffar Index, a detailed measure of socioeconomic position (SEP) specific to low- to middle-income groups, an understudied population, which may reduce misclassification of SEP.
- As the sample was low- to middle-income, these results may not generalize to groups with even lower or higher income or SEP.

## Introduction

Interest in early life infant growth has grown as evidence accumulates that it is associated with the development of adult disease, sometimes decades later. Some chronic disease outcomes associated with infant growth characteristics include obesity, endothelial dysfunction, and metabolic syndrome [1–3]. Explanations for these associations include early infancy as a critical window of time for susceptibility to environmental exposures for chronic disease risk factors [4]. Socioeconomic position (SEP) is one such exposure. SEP is associated with child growth patterns, in particular, length [5–12] and weight [13–16]. In these studies, lower SEP is generally associated with faster weight gain during childhood, while the inverse holds true for length. These socioeconomic gradients in growth appear to emerge in early life [7] and persist [5].

Gaps remain in our understanding regarding sociodemographic predictors of growth during infancy and childhood. One such gap relates to the earliest period of infant growth. Most studies to date include three or fewer observations before six months [5–8,10,11,13,14,16], preventing nonlinear specifications between weight or height spanning this time. However, curvilinear models of growth with more than three observations offer better model fit for early infancy growth. Growth during the first six months in the human lifespan is characterized by accelerated growth at the outset and leveling off at around six months [17]. Given these unique features, early infant growth may yield unique associations with predictors not influential during later periods of growth. Understanding the relationship between early infant growth and sociodemographic factors may yield new information that highlight the potential for earlier interventions to promote optimal health.

Identifying novel associations in this age range can better pinpoint the timing and influence of sociodemographic factors. Given the sparsity of information in the literature focusing on these points, our aim in this study is to examine sociodemographic predictors of infant weight, length and weight-for-length (WFL) growth from zero to five months in an infancy cohort of over 1,400 healthy Chilean children. Based on prior research in middle- to high-income countries applied to a wider range of ages in childhood that is described above, we expected that SEP will be inversely associated with weight gain and positively associated with length growth.

## Methods

### Study sample

The data in this study are drawn from the Santiago Longitudinal Study (SLS), a cohort study from low- to middle-income neighborhoods in Santiago, Chile. Between 1991 and 1996, infants were recruited for an infancy iron deficiency anemia preventive trial [18] or neuromaturation study [19]. Inclusion criteria for the infancy studies included full term infants [greater than or equal to 37 weeks gestational age (GA)] with birthweight  $\geq$  3.0 kg, vaginal birth, no major health problems for the infant, and, for the preventive trial, no iron deficiency anemia present at five to six months. Those with iron deficiency anemia and the next nonanemic control were invited to participate in the neuromaturation study and are not considered here. Participant eligibility and follow-up information have previously been reported [18]. The Santiago Longitudinal Study (SLS) had been approved by Institutional Review Boards from 1) the University of Michigan, Ann Arbor, 2) Institute of Nutrition and Food Technology (INTA), Chile and 3) University of California, San Diego.

We characterized the growth period prior to treatment randomization, which occurred at six months. Anthropometric measures prior to study enrollment were obtained from the medical chart. The total sample size included 1,657 infants who completed the preventive trial.

### Outcome and sociodemographic measures

Anthropometric measurements included weight (kg), length (cm), and weight-for-length (WFL) (g/cm). Weight was measured to the nearest 0.01 kg on an electronic scale at local public health clinics. Length was measured on a recumbent board to the nearest 0.1 cm. Gestational age (GA), obtained from the medical chart, was among the set of variables included in the models as a covariate.

Sociodemographic measures were self-reported by the mother, including maternal age (years), total years of education, and the modified Graffar index [20], an index of SEP used in lower-income countries [21]. The modified Graffar index represents a sum of 10 measures regarding education, family composition, and housing characteristics, which are summed to create a scale with higher values indicating lower social class (Appendix Table A1). Mothers self-reported breastfeeding characteristics from birth, including date of first bottle and age at weaning if weaned. From this information, we created variables for breastfeeding as the sole source of milk and mixed breast and bottle feeding at five months.

### Statistical analyses

Summary statistics included median and interquartile ranges for continuous variables and percent with counts for categorical variables. All summary statistics were stratified by child sex. We used two steps to assess the association between infant growth and sociodemographic predictors: 1) SuperImposition by Translation and Rotation (SITAR) approach [22] to estimate infant weight, length and weight-for-length (WFL) growth characteristics from birth to five months followed by 2) linear regression to estimate the

relationship between sociodemographic predictors and these growth characteristics. We used a nonlinear mixed effects model [23] to estimate the growth characteristics with the R nlme package [24]. Each model produces up to three different SITAR growth parameters per individual, which have been named 'size', 'tempo' and 'velocity' [22] (Figure 1). 'Size' indicates a shift of the growth curve up and down for an individual relative to the average growth curve. 'Tempo' indicates a shift of the growth curve to the left or right on the age scale for an individual relative to the average growth curve. Lastly, 'velocity' indicates a transformation of the age scale in the nonlinear model, shrinking or enlarging the age scale for an individual relative to the average growth curve. These three parameters are noted as having biologically meaningful interpretations, which are difficult to obtain with other growth models [23]. Unless otherwise noted, any references to 'size', 'tempo', and 'velocity' refer to these parameters from the SITAR construct applied to early infant growth.

[Figure 1 about here](#)

The results from the second step analyses are reported. In addition to including males and females and adjusting for sex of the child (in the pooled analyses), sex-stratified analyses were also used for all three anthropometric outcomes, as some estimated associations between the SITAR growth parameters and SEP indicators differed by sex of the child.

The adjusted models in the second step started with four covariates: gestational age, maternal age, total years of maternal education, and Graffar index [20]. We removed covariates from the model based on the least absolute shrinkage and selection operator (lasso) approach [25]. This approach has better performance than conventional model selection methods with a univariate approach [26] such as stepwise methods [27]. The lasso approach assists in selecting predictors with the strongest coefficients [28] while balancing bias and variation in the model. We used the glmnet package in R [29] to estimate shrunken parameters and the selectiveInference package [30] to provide inference via statistical tests and confidence intervals. Each set of comparisons by outcome, i.e. weight, length or weight-for-length were considered separately. Multiple comparisons increase the possibility of statistically significant study findings by chance alone. Therefore, we controlled for multiple comparisons using a Bonferroni correction at an alpha level of 0.05. A coefficient for the predictor of a weight size growth parameter outcome in the second step indicates a change in  $\log(\text{kg})$  for a one-unit change in the predictor; we multiply this coefficient by 100 to make a symmetric percentage difference on a modified percentage scale [31,32]. Similarly, a one-unit change in the predictor corresponds to a symmetric percentage change in the velocity growth parameter. Time (days) is not log transformed and the coefficient for this outcome corresponds to a shift in the time scale in days.

For analyses, we used a complete case data set, i.e., all participants with non-missing covariates. The proportion of missing data was less than one percent for all variables except the Graffar index, which had less than three percent missing. The median number of non-missing outcome (anthropometric) values was six out of six monthly measures (birth to five months). The percent of missing outcome values at each time point ranged from 9% at months 1 and 2 to 0.2% at birth. In a post hoc data analysis we used logistic regression

models to estimate associations between SEP (the Graffar Index) as a continuous variable, and binary breastfeeding status outcomes – any or exclusive – at five months.

## Patient and public involvement

Participants were mothers and infants recruited for research. The mothers were not involved in setting the study design, research questions or outcome measures for this study.

## Results

Participants (n=1,412) were 53% male and 47% female. Median gestational age (Q1, Q3) was 40 weeks (39, 40). Median maternal age (Q1, Q3) was 26 years (22, 31), and mothers had a median (IQR) of 10 (8, 12) years of education at the time of their infant's birth (Table 1). For the six monthly anthropometric measurements prior to six months, each infant had at least two observations, and 72% had measures at all six time points.

[Put table 1 about here](#)

We assessed best model fit for each anthropometric measure via the lowest Bayesian Information Criterion (BIC) for growth independent of any covariates. After evaluating all possible combinations of SITAR models from one to three parameters for each of the three anthropometric measures, best fit (Appendix Table A2) models included: 1) all three growth parameters for weight, i.e. 'size', 'tempo', and 'velocity', 2) sex-specific growth trajectories with tempo and velocity parameters for length, and 3) sex-specific growth trajectories with size and tempo parameters for WFL.

The following sections outline the adjusted results of the growth trajectory analyses for the three anthropometric outcomes: weight (kg), length (cm) and weight-for-length (WFL) (g/cm).

### Weight trajectories: size, tempo and velocity

After including all covariates in the model, gestational age was the only characteristic associated with any weight growth parameters. In the pooled sample, gestational age was significantly associated with the weight tempo parameter (-2.01, 95% CI = -2.98, -1.70), indicating a leftward shift of about two days for each additional week in gestational age. This indicates earlier timing of weight gain in infants who were born with higher gestational age (Table 2). There was no substantive difference in this association in the sex-stratified analyses.

[put table 2 about here](#)

### Length trajectories: tempo and velocity

When evaluating the relationship between deviations from the average length growth characteristics and sociodemographic predictors, we found associations for SEP and gestational age. In the pooled group, the coefficient of association between the Graffar

index and the velocity parameter (-0.22, 95% CI = -0.31, -0.13) (Table 3) indicated that for each unit increase in the Graffar index, lower values indicating higher SEP, there was a -0.22 percent decline from the average length velocity. Conversely, this association reflects a positive relationship between the length velocity parameter and SEP. This coefficient was not substantively different in the sex-stratified analyses, all of which indicated faster linear (length) growth with higher SEP. In contrast to the sex-stratified analyses, all covariates remained in the pooled adjusted model with less than 5% change from the unadjusted SEP coefficient (-0.23, 95% CI = -0.31, -0.15). Similar to SEP, GA was also positively associated with the length velocity parameter, demonstrating a 0.61 percent (95% CI = 0.06, 1.15) increase from the average length velocity in the pooled sample for every unit increase in GA (weeks). Gestational age was inversely associated with the length tempo parameter in the pooled sample (-2.94, 95% CI = -3.51, -2.41), indicating a leftward shift of about three days of the trajectory on the time scale, and a faster start to length growth, for each one week increase in gestational age (Table 3).

[put Table 3 about here](#)

### **Weight-for-length trajectories: size and tempo**

Evaluations of shifts in WFL size and tempo from the average indicated associations with SEP and GA. Increases in the Graffar Index, equivalent to lower SEP, were associated with a positive shift in the WFL tempo parameter for females (0.25, 95% CI = 0.05, 0.42). This estimate approximates a rightward shift in time (days) relative to the average growth curve indicating later growth timing with lower SEP.

Similar to weight and length trajectory analyses, an increase in gestational age was inversely associated with a decline in tempo from the average in the pooled sample (-1.99, 95% CI = -2.83, -1.49) (Table 4) indicating about a two-day shift to the left on the time scale from the average growth curve for every one week increase in gestational age. Similar values were found in the sex-stratified analyses, all indicating earlier timing of WFL growth with higher gestational age.

[put Table 4 about here](#)

The post hoc analysis examining the association between odds of exclusive or any breastfeeding at five months and the continuous SEP measure (the Graffar index) did not find a substantive or significant association (data not shown).

## **Discussion**

In this research, we found that lower SEP, measured by the Graffar index, was inversely associated with length growth characteristics – but not weight – in the first five months. Lower SEP was associated with later timing of WFL growth as reflected by the positive association between the Graffar Index and the WFL tempo parameter. These higher tempo values translate to a rightward shift in growth relative to the average growth curve as well as a later age at peak velocity [33]. This delay in growth can be considered an unfavorable outcome associated with lower SEP.

1  
2  
3 Maternal age was not associated with any of the three adjusted growth parameters for  
4 length, weight, or weight-for-length. Gestational age (GA) was inversely associated with the  
5 tempo growth parameters for length, weight, and weight-for-length indicating higher GA is  
6 associated with earlier timing of these three measures. Gestational age is also positively  
7 associated with length velocity in the pooled sample indicating faster length change with  
8 increasing GA.  
9

10  
11 Of three previous studies investigating associations between sociodemographic predictors  
12 and infant growth before six months, two studies found a significant and fully-adjusted  
13 positive association between length (linear) growth and maternal education [8,10], used as  
14 a proxy for SEP. Only one study found an inverse association with length growth [12],  
15 which was close to null upon adjustment. Many studies including age ranges exceeding six  
16 months of age up to five years of age demonstrated a positive association between  
17 maternal education and length/height growth [7,8,10]. The majority of these studies  
18 support the conclusion that lower SEP is associated with slower length (linear) growth in  
19 infancy and early childhood.  
20  
21

22 Several prior studies representing high-income European countries have noted that their  
23 findings of no evidence of a relationship [7,12] between SEP and length (linear) growth  
24 prior to six months may not generalize to low- to middle-income countries. Deviations from  
25 the Western diet and lifestyle were one of the reasons given for this limitation. Chile, the  
26 country from which our data were collected, offers an interesting context in this respect.  
27 The recruitment period for this study, 1991 to 1996, occurred as Chile was transitioning  
28 from a low-income to an upper-middle income country. In 1990, 40% of the Chilean  
29 population was below the poverty line [34]; by 2012 WHO classified Chile as an upper  
30 middle-income country [35]. There were nutrition and epidemiologic transitions [36,37]  
31 beginning in the 1970s and continuing during the 1990s when study infants were enrolled.  
32 Specifically, consumption of high-calorie food, accompanied by a sedentary lifestyle,  
33 resulted in rising obesity prevalence across all socioeconomic levels. In the context of an  
34 emerging Western diet and lifestyle, we found that lower SEP was associated with poorer  
35 length (linear) growth in early infancy. Of course, contemporary generations in Chile  
36 experience lower SEP in a new context of over-nutrition and higher levels of sedentary  
37 behavior. Thus, current studies in Chile may find distinct relationships between SEP and  
38 early growth when compared with generations born 20 years ago.  
39  
40  
41  
42

43 Plausible biological mechanisms, linked to modifiable factors, have been proposed for the  
44 observed association between lower SEP and length growth in the first five postnatal  
45 months. Breastfeeding and maternal smoking are two commonly proposed mechanisms,  
46 although evidence is limited. In our sample, breastfeeding was close to universal [38,39]  
47 and not associated with infant weight change in the first year. We did not evaluate  
48 maternal smoking in this study given the large proportion of missing information.  
49 However, prior studies did not find that either prenatal or postnatal maternal smoking  
50 substantially altered the association between SEP and growth [11,12,16].  
51  
52

53 Maternal age was the only sociodemographic predictor positively associated with the  
54 unadjusted SITAR size growth parameter for weight. This was similarly reported in  
55 another cohort from the same geographic area of Santiago, Chile, the Growth and Obesity  
56  
57



1  
2  
3 Cohort Study (GOCS) [13], which started a decade later and studied ages between birth and  
4 2 years. Our findings add to this work. Through our intense focus on the first five postnatal  
5 months, our results demonstrate that the association between SEP and weight growth  
6 appears earlier in the postnatal period than previously documented.  
7

8 Other potential mechanisms relating to SEP could include gestational weight gain and  
9 maternal nutrient status. Size at birth, considered a proxy for these two factors and  
10 represented in these analyses by the size SITAR parameter, was not associated with any of  
11 the sociodemographic measures. Further research will be useful in clarifying the biological  
12 mechanisms behind the association between SEP and early infant growth.  
13  
14

15 Strengths of this study include the combination of an analytic approach to growth that  
16 better captures the nonlinear characteristic of growth in the first five months of life with a  
17 detailed measure of socioeconomic position appropriate to the context of a lower income  
18 setting. Another strength is the monthly anthropometric measures collected in the first five  
19 postnatal months. We also note several limitations. The sample size ( $n = 1,412$ ) is smaller  
20 than other studies with sample sizes in the thousands or tens of thousands [5,13,14]. Our  
21 study, therefore, may not have been powered to detect some effects reported in larger  
22 studies. Another limitation is that the Graffar index, developed to assess differences in low-  
23 to middle-income populations, limits the generalizability of our findings to higher income  
24 groups.  
25  
26

27 This investigation examined various growth characteristics from birth to five months and  
28 their association with sociodemographic factors in a Chilean infancy cohort. We found  
29 associations between lower SEP and slower length (linear) growth, which are similar in  
30 direction to previous findings for maternal education that span periods of time greater  
31 than the first six months and up to five years of age [7,8,10,12]. The association between  
32 maternal age and weight size, in our study, was similar to findings in other studies of  
33 growth between birth and two years of age [13]. In sum, our results extend findings from  
34 previous research by showing that sociodemographic factors affect infant growth even in  
35 the first five months of growth and in relatively homogenous low- to middle-income  
36 populations.  
37  
38  
39  
40

## 41 Acknowledgements

42 We thank the Santiago Longitudinal Study participants.  
43  
44  
45

## 46 Contributors

47 AVH designed the study, conducted the data analysis, and wrote the first draft of the paper.  
48 KEN and SG supervised and contributed to the study design, interpretation of results, and  
49 draft revisions. EB helped acquire the data. All authors  
50 (AVH,KEN,SG,EB,BL,AGH,AJ,MG,VSV) both contributed to revisions of the draft for  
51 intellectual content and approved the final version of the manuscript.  
52  
53  
54  
55  
56  
57

## Funding

AVH was supported by an American Heart Association Mid-Atlantic Affiliate predoctoral fellowship (award number 16PRE29200008). KEN was supported by AHA grant 15GRNT25880008. The data for this work was supported by grants from the National Institutes of Health R01-HL-088530 and R01-HD-033487

## Competing interests

None declared.

## Patient consent

Not required.

## Ethics approval

The Santiago Longitudinal Study (SLS) had been approved by Institutional Review Boards from 1) University of Michigan Medical Center, Ann Arbor, 2) Institute of Nutrition and Food Technology (INTA), Chile and 3) University of California, San Diego. The Office of Human Research Ethics at the University of North Carolina, Chapel Hill exempted this current research using existing anonymous data from review under the 45 CFR 46.101(b) regulatory category.

## Data sharing agreement

No additional data are available.

## Disclaimer

AHA had no role in the study design, data collection, and analysis, decision to publish or preparation of the manuscript.

## References

1. Gillman MW. The first months of life: A critical period for development of obesity. *Am J Clin Nutr.* 2008 Jun;87(6):1587–9.
2. Leunissen RWJ. Timing and tempo of first-year rapid growth in relation to cardiovascular and metabolic risk profile in early adulthood. *JAMA.* 2009 Jun 3;301(21):2234.

- 1  
2  
3 3. Touwslager RN, Houben AJ, Tan FE, Gielen M, Zeegers MP, Stehouwer CD, et al. Growth  
4 and endothelial function in the first 2 years of life. *The Journal of Pediatrics*. 2015  
5 Mar;166(3):666–671.e1.  
6
- 7 4. Plagemann A, Harder T, Schellong K, Schulz S, Stupin JH. Early postnatal life as a critical  
8 time window for determination of long-term metabolic health. *Best Practice & Research  
9 Clinical Endocrinology & Metabolism*. 2012 Oct;26(5):641–53.  
10
- 11 5. McCrory C, O’Leary N, Fraga S, Ribeiro AI, Barros H, Kartiosuo N, et al. Socioeconomic  
12 differences in children’s growth trajectories from infancy to early adulthood: Evidence  
13 from four european countries. *Journal of Epidemiology and Community Health*. 2017  
14 Oct;71(10):981–9.  
15
- 16 6. Murasko JE. Associations between household income, height and BMI in contemporary  
17 US children: Infancy through early childhood. *Annals of Human Biology*. 2014  
18 Nov;41(6):488–96.  
19
- 20 7. Howe LD, Tilling K, Galobardes B, Smith GD, Gunnell D, Lawlor DA. Socioeconomic  
21 differences in childhood growth trajectories: At what age do height inequalities emerge?  
22 *Journal of Epidemiology and Community Health*. 2012 Feb;66(2):143–8.  
23
- 24 8. Patel R, Tilling K, Lawlor DA, Howe LD, Bogdanovich N, Matush L, et al. Socioeconomic  
25 differences in childhood length/height trajectories in a middle-income country: A cohort  
26 study. *BMC public health*. 2014;14(1):932.  
27
- 28 9. Queiroz VA de O, Assis AMO, Pinheiro SMC, Junior H da CR. Predictors of linear growth in  
29 the first year of life of a prospective cohort of full term children with normal birth weight.  
30 *Jornal de Pediatria*. 2012 Feb 15;88(1):79–86.  
31
- 32 10. Matijasevich A, Howe LD, Tilling K, Santos IS, Barros AJD, Lawlor DA. Maternal  
33 education inequalities in height growth rates in early childhood: 2004 pelotas birth cohort  
34 study: Inequalities in childhood height. *Paediatric and Perinatal Epidemiology*. 2012  
35 May;26(3):236–49.  
36
- 37 11. Herngreen W, Buuren S van, Wieringen J van, Reerink J, Verloove-Vanhorick S, Ruys J.  
38 Growth in length and weight from birth to 2 years of a representative sample of  
39 netherlands children (born in 1988–89) related to socioeconomic status and other  
40 background characteristics. *Annals of Human Biology*. 1994 Jan;21(5):449–63.  
41
- 42 12. Silva LM, Rossem L van, Jansen PW, Hokken-Koelega ACS, Moll HA, Hofman A, et al.  
43 Children of low socioeconomic status show accelerated linear growth in early childhood;  
44 results from the generation r study. Wang G, editor. *PLoS ONE*. 2012 May 23;7(5):e37356.  
45
- 46 13. Pizzi C, Cole TJ, Richiardi L, dos-Santos-Silva I, Corvalan C, De Stavola B. Prenatal  
47 influences on size, velocity and tempo of infant growth: Findings from three contemporary  
48 cohorts. Wang G, editor. *PLoS ONE*. 2014 Feb 27;9(2):e90291.  
49
- 50 14. Hui L, Leung GM, Cowling BJ, Lam T, Schooling CM. Determinants of infant growth:  
51 Evidence from hong kong’s “children of 1997” birth cohort. *Annals of Epidemiology*. 2010  
52 Nov;20(11):827–35.  
53

15. Fuemmeler BF, Wang L, Iversen ES, Maguire R, Murphy SK, Hoyo C. Association between prepregnancy body mass index and gestational weight gain with size, tempo, and velocity of infant growth: Analysis of the newborn epigenetic study cohort. *Childhood Obesity*. 2016 Jun;12(3):210–8.
16. Wijlaars LPMM, Johnson L, Jaarsveld CHM van, Wardle J. Socioeconomic status and weight gain in early infancy. *International Journal of Obesity*. 2011 Jul;35(7):963–70.
17. Lejarraga H. Growth in infancy and childhood. In: *Human growth and development*. Elsevier; 2012. pp. 23–56.
18. Lozoff B, De Andraca I, Castillo M, Smith JB, Walter T, Pino P. Behavioral and developmental effects of preventing iron-deficiency anemia in healthy full-term infants. *Pediatrics*. 2003 Oct;112(4):846–54.
19. Lozoff B, Kaciroti N, Walter T. Iron deficiency in infancy: Applying a physiologic framework for prediction. *The American journal of clinical nutrition*. 2006;84(6):1412–21.
20. Graffar M. Une methode de classification sociales d'echantillons de population. *Courrier*. 1956;6:445–59.
21. Alvarez ML, Muzzo S, Ivanović D. Scale for measurement of socioeconomic level, in the health area. *Rev Med Chil*. 1985 Mar;113(3):243–9.
22. Cole TJ, Donaldson MDC, Ben-Shlomo Y. SITAR – a useful instrument for growth curve analysis. *International Journal of Epidemiology*. 2010 Jul 20;39(6):1558–66.
23. Beath KJ. Infant growth modelling using a shape invariant model with random effects. *Statistics in Medicine*. 2007 May 30;26(12):2547–64.
24. Pinheiro J, Bates D, DebRoy S, Sarkar D, R Core Team. *nlme: Linear and nonlinear mixed effects models*. 2017.
25. Tibshirani R. Regression shrinkage and selection via the lasso: A retrospective. *Journal of the Royal Statistical Society: Series B (Statistical Methodology)*. 2011 Jun 1;73(3):273–82.
26. Greenland S. Invited commentary: Variable selection versus shrinkage in the control of multiple confounders. *American Journal of Epidemiology*. 2007 Dec 12;167(5):523–9.
27. Harrell FE. *Regression modeling strategies: with applications to linear models, logistic regression, and survival analysis*. New York: Springer; 2015. (Springer series in statistics).
28. Hastie T, Tibshirani R, Friedman JH. *The elements of statistical learning: Data mining, inference, and prediction*. Second edition, corrected at 12th printing 2017. New York: Springer; 2017. 745 pp. (Springer series in statistics).
29. Friedman J, Hastie T, Tibshirani R. Regularization paths for generalized linear models via coordinate descent. *Journal of Statistical Software*. 2010;33(1):1–22.

- 1  
2  
3 30. Tibshirani R, Tibshirani R, Taylor J, Loftus J, Reid S. selectiveInference: Tools for post-  
4 selection inference [R package version 1.2.4]. 2017.  
5  
6 31. Cole TJ, Altman DG. Statistics notes: Percentage differences, symmetry, and natural  
7 logarithms. *BMJ*. 2017 Aug 16;j3683.  
8  
9 32. Cole TJ. Sympercents: Symmetric percentage differences on the 100 loge scale simplify  
10 the presentation of log transformed data. *Statistics in Medicine*. 2000 Nov 30;19(22):3109-  
11 25.  
12  
13 33. Cole T, Kuh D, Johnson W, Ward K, Howe L, Adams J, et al. Using super-imposition by  
14 translation and rotation (SITAR) to relate pubertal growth to bone health in later life: The  
15 medical research council (MRC) national survey of health and development. *International*  
16 *Journal of Epidemiology*. 2016; 1125(4): 1125-1134  
17  
18 34. Jimenez J, Romero MI. Reducing infant mortality in Chile: Success in two phases. *Health*  
19 *Affairs*. 2007 Mar 1;26(2):458-65.  
20  
21 35. Gitlin LN, Fuentes P. The republic of Chile: An upper middle-income country at the  
22 crossroads of economic development and aging. *The Gerontologist*. 2012 Jun 1;52(3):297-  
23 305.  
24  
25 36. Albala C, Vio F, Kain J, Uauy R. Nutrition transition in Latin America: The case of Chile.  
26 *Nutr Rev*. 2001 Jun;59(6):170-6.  
27  
28 37. Albala C, Vio F, Kain J, Uauy R. Nutrition transition in Chile: Determinants and  
29 consequences. *Public Health Nutrition*. 2002 Feb;5(1).  
30  
31 38. Kang Sim DE, Cappiello M, Castillo M, Lozoff B, Martinez S, Blanco E, et al. Postnatal  
32 growth patterns in a Chilean cohort: The role of SES and family environment. *International*  
33 *Journal of Pediatrics*. 2012;2012:1-8.  
34  
35 39. Khuc K, Blanco E, Burrows R, Reyes M, Castillo M, Lozoff B, et al. Adolescent metabolic  
36 syndrome risk is increased with higher infancy weight gain and decreased with longer  
37 breast feeding. *International Journal of Pediatrics*. 2012;2012:1-6.  
38  
39  
40  
41  
42  
43  
44  
45  
46  
47  
48  
49  
50  
51  
52  
53  
54  
55  
56  
57  
58  
59  
60

Table 1. Descriptive statistics of sociodemographic characteristics, median [IQR]

| Characteristic             | Male              | Female            | Total             |
|----------------------------|-------------------|-------------------|-------------------|
| n                          | 747               | 665               | 1412              |
| Gestational age (weeks)    | 40.0 [39.0, 40.0] | 40.0 [39.0, 40.0] | 40.0 [39.0, 40.0] |
| Graffar Index              | 27.0 [23.0, 33.0] | 27.0 [23.0, 33.0] | 27.0 [23.0, 33.0] |
| Maternal age (years)       | 26.0 [21.8, 30.9] | 25.5 [21.7, 30.3] | 25.8 [21.8, 30.8] |
| Maternal Education (years) | 10.0 [8.0, 12.0]  | 10.0 [8.0, 12.0]  | 10.0 [8.0, 12.0]  |

view only

Table 2: Sociodemographic predictors and association with weight SITAR growth parameter<sup>a,b</sup>, stratified by sex of child in the Santiago Longitudinal Study, 1991-1996

| Characteristic             | Males                   |                                                 |                        |                        |                                                 |                        | Females                                      |                                                 |                                                 |                        |                                                 |                         | Total                                        |                                                 |                         |                        |                                                 |                        |
|----------------------------|-------------------------|-------------------------------------------------|------------------------|------------------------|-------------------------------------------------|------------------------|----------------------------------------------|-------------------------------------------------|-------------------------------------------------|------------------------|-------------------------------------------------|-------------------------|----------------------------------------------|-------------------------------------------------|-------------------------|------------------------|-------------------------------------------------|------------------------|
|                            | Unadjusted              |                                                 |                        | Adjusted <sup>c</sup>  |                                                 |                        | Unadjusted                                   |                                                 |                                                 | Adjusted <sup>c</sup>  |                                                 |                         | Unadjusted                                   |                                                 |                         | Adjusted <sup>c</sup>  |                                                 |                        |
|                            | Size                    | Tempo                                           | Velocity               | Size                   | Tempo                                           | Velocity               | Size                                         | Tempo                                           | Velocity                                        | Size                   | Tempo                                           | Velocity                | Size                                         | Tempo                                           | Velocity                | Size                   | Tempo                                           | Velocity               |
| Gest age                   | 0.59<br>(-0.12, 1.31)   | <b>-2.28</b><br>( <b>-3.15</b> , <b>-1.41</b> ) | -0.81<br>(-2.28, 0.66) | NA                     | <b>-1.96</b><br>( <b>-3.15</b> , <b>-1.40</b> ) | NA                     | 0.76<br>(-0.02, 1.54)                        | <b>-2.38</b><br>( <b>-3.32</b> , <b>-1.45</b> ) | -2.14<br>(-3.87, -0.42)                         | 0.45<br>(-0.32, 0.88)  | <b>-2.23</b><br>( <b>-3.35</b> , <b>-1.47</b> ) | -1.58<br>(-3.85, 0.08)  | 0.64<br>(0.10, 1.18)                         | <b>-2.35</b><br>( <b>-2.98</b> , <b>-1.71</b> ) | -1.53<br>(-2.70, -0.37) | 0.53<br>(-0.05, 1.15)  | <b>-2.01</b><br>( <b>-2.98</b> , <b>-1.70</b> ) | -1.06<br>(-2.67, 0.01) |
| Maternal age               | 0.11<br>(-0.00, 0.23)   | -0.06<br>(-0.20, 0.09)                          | -0.07<br>(-0.31, 0.17) | 0.07<br>(-0.11, 0.21)  | -0.06<br>(-0.21, 0.26)                          | -0.06<br>(-0.33, 0.82) | <b>0.21</b><br>( <b>0.07</b> , <b>0.34</b> ) | -0.02<br>(-0.18, 0.15)                          | <b>-0.41</b><br>( <b>-0.71</b> , <b>-0.12</b> ) | 0.19<br>(-6.13, 0.22)  | 0.01<br>(-2.29, 0.13)                           | -0.36<br>(-0.67, -0.04) | <b>0.16</b><br>( <b>0.07</b> , <b>0.25</b> ) | -0.03<br>(-0.14, 0.07)                          | -0.20<br>(-0.39, -0.00) | 0.15<br>(-0.78, 0.22)  | -0.01<br>(-0.16, 0.83)                          | -0.18<br>(-0.56, 0.22) |
| Maternal education         | -0.03<br>(-0.32, 0.26)  | 0.14<br>(-0.21, 0.49)                           | -0.04<br>(-0.62, 0.55) | NA                     | NA                                              | NA                     | -0.01<br>(-0.31, 0.29)                       | 0.06<br>(-0.30, 0.43)                           | -0.03<br>(-0.69, 0.64)                          | 0.00<br>(-Inf, -0.41)  | 0.12<br>(-0.95, 0.52)                           | NA                      | -0.03<br>(-0.24, 0.19)                       | 0.10<br>(-0.15, 0.36)                           | -0.04<br>(-0.50, 0.41)  | 0.00<br>(-10.67, 0.04) | 0.04<br>(-1.59, 1.58)                           | -0.05<br>(-0.75, 4.42) |
| Graffar Index <sup>d</sup> | -0.12<br>(-0.23, -0.01) | -0.13<br>(-0.27, 0.01)                          | -0.15<br>(-0.39, 0.08) | -0.08<br>(-0.22, 0.07) | -0.13<br>(-0.28, 0.03)                          | -0.13<br>(-0.41, 0.28) | -0.07<br>(-0.19, 0.06)                       | 0.12<br>(-0.03, 0.28)                           | 0.28<br>(0.00, 0.57)                            | -0.03<br>(-5.15, 0.23) | 0.13<br>(-0.24, 0.29)                           | 0.23<br>(-0.16, 0.52)   | -0.09<br>(-0.18, -0.00)                      | -0.01<br>(-0.11, 0.09)                          | 0.06<br>(-0.12, 0.25)   | -0.06<br>(-0.83, 0.04) | -0.00<br>(-0.06, 3.49)                          | 0.02<br>(-1.66, 0.32)  |

<sup>a</sup> Size units are percentage change in log(weight) from average, tempo units are time (days), velocity units in percent change from average.

<sup>b</sup> Bold values indicate significance with Bonferroni correction at alpha level of 0.05

<sup>c</sup> Adjusted linear regression models only include non-zero coefficients from lasso regression models that include all covariates in full model.

<sup>d</sup> Higher Graffar index values indicate lower socioeconomic status.

Table 3: Sociodemographic predictors and association with length SITAR growth parameters<sup>a,b</sup>, stratified by sex of child in the Santiago Longitudinal Study, 1991-1996

| Characteristic             | Males                          |                                |                                |                                | Females                        |                                |                                |                                | Both                           |                                |                                |                                |
|----------------------------|--------------------------------|--------------------------------|--------------------------------|--------------------------------|--------------------------------|--------------------------------|--------------------------------|--------------------------------|--------------------------------|--------------------------------|--------------------------------|--------------------------------|
|                            | Unadjusted                     |                                | Adjusted <sup>c</sup>          |                                | Unadjusted                     |                                | Adjusted <sup>c</sup>          |                                | Unadjusted                     |                                | Adjusted <sup>c</sup>          |                                |
|                            | Tempo                          | Velocity                       |
| Gest age                   | <b>-3.33</b><br>(-4.09, -2.56) | <b>0.99</b><br>(0.29, 1.68)    | <b>-3.05</b><br>(-4.10, -2.55) | NA                             | <b>-2.57</b><br>(-3.36, -1.79) | 0.25<br>(-0.52, 1.02)          | <b>-2.53</b><br>(-3.33, -1.77) | NA                             | <b>-2.97</b><br>(-3.52, -2.42) | <b>0.64</b><br>(0.12, 1.15)    | <b>-2.94</b><br>(-3.51, -2.41) | <b>0.61</b><br>(0.06, 1.15)    |
| Maternal age               | -0.04<br>(-0.18, 0.09)         | 0.09<br>(-0.03, 0.20)          | -0.01<br>(-0.10, 1.64)         | NA                             | <b>-0.17</b><br>(-0.30, -0.03) | 0.01<br>(-0.13, 0.14)          | -0.15<br>(-0.29, 0.01)         | NA                             | -0.10<br>(-0.19, -0.00)        | 0.05<br>(-0.04, 0.14)          | -0.07<br>(-0.17, 0.06)         | 0.02<br>(-0.35, 0.10)          |
| Maternal education         | 0.06<br>(-0.26, 0.38)          | 0.12<br>(-0.16, 0.40)          | NA                             | NA                             | -0.18<br>(-0.49, 0.13)         | 0.28<br>(-0.01, 0.58)          | -0.14<br>(-0.45, 0.52)         | 0.16<br>(-0.35, 0.52)          | -0.05<br>(-0.28, 0.17)         | 0.20<br>(-0.00, 0.40)          | -0.06<br>(-0.27, 0.73)         | 0.13<br>(-0.21, 0.34)          |
| Graffar Index <sup>d</sup> | 0.06<br>(-0.06, 0.19)          | <b>-0.26</b><br>(-0.37, -0.15) | 0.05<br>(-0.25, 0.36)          | <b>-0.21</b><br>(-0.37, -0.14) | <b>0.16</b><br>(0.03, 0.29)    | <b>-0.19</b><br>(-0.32, -0.07) | 0.13<br>(-0.03, 0.26)          | <b>-0.17</b><br>(-0.31, -0.05) | <b>0.11</b><br>(0.02, 0.20)    | <b>-0.23</b><br>(-0.31, -0.15) | 0.09<br>(-0.02, 0.18)          | <b>-0.22</b><br>(-0.31, -0.13) |

<sup>a</sup> Size units are percentage change in log(length) from average, tempo units are time (days), velocity units in percent change from average

<sup>b</sup> Bold values indicate significance with Bonferroni correction at alpha level of 0.05.

<sup>c</sup> Adjusted linear regression models only include non-zero coefficients from lasso regression models that include all covariates in full model.

<sup>d</sup> Higher Graffar index values indicate lower socioeconomic status.



Table 4: Sociodemographic predictors and association with weight-for-length (WFL) SITAR growth parameters<sup>a,b,c</sup> stratified by sex of child in the Santiago Longitudinal Study, 1991-1996

| Characteristic             | Males                  |                                                 |                        |                                                 | Females                |                                                 |                       |                                                 | Both                   |                                                 |                       |                                                 |
|----------------------------|------------------------|-------------------------------------------------|------------------------|-------------------------------------------------|------------------------|-------------------------------------------------|-----------------------|-------------------------------------------------|------------------------|-------------------------------------------------|-----------------------|-------------------------------------------------|
|                            | Unadjusted             |                                                 | Adjusted               |                                                 | Unadjusted             |                                                 | Adjusted              |                                                 | Unadjusted             |                                                 | Adjusted              |                                                 |
|                            | Size                   | Tempo                                           | Size                   | Tempo                                           | Size                   | Tempo                                           | Size                  | Tempo                                           | Size                   | Tempo                                           | Size                  | Tempo                                           |
| Gest age                   | 0.09<br>(-0.55, 0.73)  | <b>-2.03</b><br>( <b>-2.91</b> , <b>-1.15</b> ) | NA                     | <b>-1.58</b><br>( <b>-2.90</b> , <b>-1.11</b> ) | 0.05<br>(-0.58, 0.69)  | <b>-2.34</b><br>( <b>-3.35</b> , <b>-1.32</b> ) | NA                    | <b>-2.32</b><br>( <b>-3.35</b> , <b>-1.33</b> ) | 0.07<br>(-0.38, 0.52)  | <b>-2.17</b><br>( <b>-2.84</b> , <b>-1.51</b> ) | NA                    | <b>-1.99</b><br>( <b>-2.83</b> , <b>-1.19</b> ) |
| Maternal age               | 0.07<br>(-0.03, 0.18)  | -0.09<br>(-0.23, 0.06)                          | 0.04<br>(-0.23, 0.16)  | -0.08<br>(-0.24, 0.17)                          | 0.02<br>(-0.09, 0.13)  | -0.18<br>(-0.36, -0.00)                         | NA                    | -0.13<br>(-0.36, 0.14)                          | 0.05<br>(-0.03, 0.12)  | -0.13<br>(-0.24, -0.02)                         | 0.03<br>(-0.16, 0.12) | -0.11<br>(-0.22, 0.03)                          |
| Maternal education         | -0.09<br>(-0.35, 0.16) | 0.08<br>(-0.27, 0.44)                           | NA                     | NA                                              | -0.10<br>(-0.35, 0.14) | 0.00<br>(-0.40, 0.40)                           | NA                    | 0.07<br>(-2.11, 0.42)                           | -0.10<br>(-0.28, 0.08) | 0.04<br>(-0.22, 0.31)                           | NA                    | NA                                              |
| Graffar Index <sup>d</sup> | -0.08<br>(-0.18, 0.02) | -0.07<br>(-0.21, 0.07)                          | -0.05<br>(-0.17, 0.15) | -0.08<br>(-0.24, 0.17)                          | 0.08<br>(-0.02, 0.19)  | <b>0.26</b><br>( <b>0.10</b> , <b>0.43</b> )    | 0.04<br>(-0.21, 0.18) | <b>0.25</b><br>( <b>0.05</b> , <b>0.42</b> )    | -0.01<br>(-0.08, 0.07) | 0.08<br>(-0.03, 0.19)                           | NA                    | 0.06<br>(-0.14, 0.17)                           |

<sup>a</sup> Size units are percentage change in log(WFL) from average, tempo units are time (days), velocity units in percent change from average.

<sup>b</sup> Bold values indicate significance with Bonferroni correction at alpha level of 0.05.

<sup>c</sup> Adjusted linear regression models only include non-zero coefficients from lasso

regression models that include all covariates in full model.

<sup>d</sup> Higher Graffar index values indicate lower socioeconomic status

1  
2  
3  
4  
5  
6 Figure 1 caption: Type of change in random effects relative to the sample mean trajectory in  
7 weight growth curve trajectories following a shape invariant model (SIM).  
8  
9  
10  
11  
12  
13  
14  
15  
16  
17  
18  
19  
20  
21  
22  
23  
24  
25  
26  
27  
28  
29  
30  
31  
32  
33  
34  
35  
36  
37  
38  
39  
40  
41  
42  
43  
44  
45  
46  
47  
48  
49  
50  
51  
52  
53  
54  
55  
56  
57  
58  
59  
60



Figure 1. Type of change in random effects relative to the sample mean trajectory in weight growth curve trajectories following a shape invariant model (SIM).

Appendix Table 1. Description of items used for Graffar index

| Graffar item                                      | Scale                                  | n(%)        |
|---------------------------------------------------|----------------------------------------|-------------|
| N                                                 |                                        | 1412        |
| No. people in hh 'eating from 1 pot' (%)          | 1: 1-3                                 | 230 (16.3)  |
|                                                   | 2: 4-6                                 | 865 (61.3)  |
|                                                   | 3: 7-9                                 | 254 (18.0)  |
|                                                   | 4: 10-12                               | 55 ( 3.9)   |
|                                                   | 5: 13-15                               | 6 ( 0.4)    |
|                                                   | 6: over 16                             | 2 ( 0.1)    |
| Father's presence in household (%)                | 1: father is present; not left hh      | 1197 (84.8) |
|                                                   | 3: left hh but sends money             | 66 ( 4.7)   |
|                                                   | 4: partially left hh                   | 38 ( 2.7)   |
|                                                   | 6: completely gone                     | 111 ( 7.9)  |
| Head of household's highest educational level (%) | 1: university completed                | 12 ( 0.9)   |
|                                                   | 2: university not completed            | 9 ( 0.6)    |
|                                                   | 3: h.s. or technical studies completed | 325 (23.0)  |
|                                                   | 4: completed 8th grade                 | 664 (47.1)  |
|                                                   | 5: did not reach 8th grade             | 382 (27.1)  |
|                                                   | 6: no schooling                        | 19 ( 1.3)   |
| Property ownership (%)                            | 1: owned                               | 269 (19.1)  |
|                                                   | 2: home mortgage                       | 83 ( 5.9)   |
|                                                   | 3: rent                                | 243 (17.2)  |
|                                                   | 4: given to you as a gift              | 117 ( 8.3)  |
|                                                   | 5: squatters w tents or construction   | 7 ( 0.5)    |
|                                                   | 6: living in back of main house        | 693 (49.1)  |
| Type of house construction (%)                    | 1: very large house                    | 15 ( 1.1)   |
|                                                   | 2: smaller house                       | 181 (12.8)  |
|                                                   | 3: tiny concrete house                 | 330 (23.4)  |

Appendix Table 1. Description of items used for Graffar index

| Graffar item                                                                                 | Scale                                    | n(%)        |
|----------------------------------------------------------------------------------------------|------------------------------------------|-------------|
|                                                                                              | 4: self-constructed home                 | 398 (28.2)  |
|                                                                                              | 5: wooden house                          | 94 ( 6.7)   |
|                                                                                              | 6: wooden house w/ less than three rooms | 394 (27.9)  |
| Characteristics of the kitchen (%)                                                           | 1: independent kitchen in one room       | 931 (65.9)  |
|                                                                                              | 6: kitchen in a room with multiple uses  | 481 (34.1)  |
| Sewage,plumbing (%)                                                                          | 1: inside plumbing                       | 1402 (99.3) |
|                                                                                              | 5: out house                             | 9 ( 0.6)    |
|                                                                                              | 6: just go in woods                      | 1 ( 0.1)    |
| Water (%)                                                                                    | 1: water from inside home faucet         | 949 (67.2)  |
|                                                                                              | 6: water from outside faucet             | 463 (32.8)  |
| No. times garbage collected per week (%)                                                     | 1: more than 4x/week                     | 6 ( 0.4)    |
|                                                                                              | 2: 3 times/week                          | 1288 (91.2) |
|                                                                                              | 3: 2 times/week                          | 117 ( 8.3)  |
|                                                                                              | 6: never                                 | 1 ( 0.1)    |
| Total count of previous six goods,possession (tv, washing machine, stereo, refrig., car) (%) | 1: 13-15 (own all six goods)             | 77 ( 5.5)   |
|                                                                                              | 2: 10-12                                 | 311 (22.3)  |
|                                                                                              | 3: 7-9                                   | 302 (21.6)  |
|                                                                                              | 4: 4-6                                   | 277 (19.9)  |
|                                                                                              | 5: 1-3                                   | 374 (26.8)  |
|                                                                                              | 6: 0                                     | 54 ( 3.9)   |

Appendix Table 2: Nonlinear mixed effects model fit evaluation: BIC for all evaluated models

| Trajectory type | Model ID          | Model description                                          | BIC <sup>a</sup> |
|-----------------|-------------------|------------------------------------------------------------|------------------|
|                 | no random effects | no random effects                                          | NA               |
|                 | m2                | random size (alpha0)                                       | -19546.4         |
|                 | m3                | random tempo (beta0)                                       | -17232           |
|                 | m4                | random velocity (beta1)                                    | -18323           |
|                 | m5                | random tempo and velocity (beta0 and beta1)                | -21901.5         |
|                 | m5.strat          | m5 + sex-spec effects                                      | -22123.4         |
|                 | m5.strat2         | m5.strat + sex-spec corr structure                         | -22107.5         |
|                 | m6                | random size and tempo (alpha0 and beta0)                   | -21740.4         |
|                 | m7                | random size and velocity (alpha0 and beta1)                | -21629.8         |
| Weight          | m8                | random size, tempo and velocity (alpha0, beta0, and beta1) | <b>-22940.66</b> |
|                 | no random effects | no random effects                                          | NA               |
|                 | m2                | random size (alpha0)                                       | -37399.5         |
|                 | m3                | random tempo (beta0)                                       | -36684.1         |
|                 | m4                | random velocity (beta1)                                    | -34985.7         |
|                 | m5                | random tempo and velocity (beta0 and beta1)                | -37820           |
|                 | m5.strat          | m5 + sex-spec effects                                      | <b>-38000.74</b> |
|                 | m5.strat2         | m5.strat + sex-spec corr structure                         | -37978.2         |
|                 | m6                | random size and tempo (alpha0 and beta0)                   | -37381.5         |
| Height          | m7                | random size and velocity (alpha0 and beta1)                | -37819.9         |
|                 | no random effects | no random effects                                          | NA               |
|                 | m2                | random size (alpha0)                                       | -21147.2         |
|                 | m3                | random tempo (beta0)                                       | -18852.1         |
|                 | m4                | random velocity (beta1)                                    | -20549.9         |
|                 | m5                | random tempo and velocity (beta0 and beta1)                | -22598           |
|                 | m5.strat          | m5 + sex-spec effects                                      | -22761.2         |
|                 | m5.strat2         | m5.strat + sex-spec corr structure                         | -22751.3         |
|                 | m6                | random size and tempo (alpha0 and beta0)                   | <b>-22808.5</b>  |
| WFL             | m7                | random size and velocity (alpha0 and beta1)                | -22484.6         |

<sup>a</sup>Bold values indicate lowest value within a trajectory evaluation.

# Reporting checklist for cohort study.

Based on the STROBE cohort guidelines.

## Instructions to authors

Complete this checklist by entering the page numbers from your manuscript where readers will find each of the items listed below.

Your article may not currently address all the items on the checklist. Please modify your text to include the missing information. If you are certain that an item does not apply, please write "n/a" and provide a short explanation.

Upload your completed checklist as an extra file when you submit to a journal.

In your methods section, say that you used the STROBE cohort reporting guidelines, and cite them as:

von Elm E, Altman DG, Egger M, Pocock SJ, Gøtzsche PC, Vandenbroucke JP. The Strengthening the Reporting of Observational Studies in Epidemiology (STROBE) Statement: guidelines for reporting observational studies.

|                           |                                                                                                        | Page   |
|---------------------------|--------------------------------------------------------------------------------------------------------|--------|
|                           | Reporting Item                                                                                         | Number |
| <b>Title and abstract</b> |                                                                                                        |        |
| Title                     | <a href="#">#1a</a> Indicate the study's design with a commonly used term in the title or the abstract | 1      |

|    |                      |                     |                                                                 |    |
|----|----------------------|---------------------|-----------------------------------------------------------------|----|
| 1  | Abstract             | <a href="#">#1b</a> | Provide in the abstract an informative and balanced summary     | 3  |
| 2  |                      |                     | of what was done and what was found                             |    |
| 3  |                      |                     |                                                                 |    |
| 4  |                      |                     |                                                                 |    |
| 5  |                      |                     |                                                                 |    |
| 6  | <b>Introduction</b>  |                     |                                                                 |    |
| 7  |                      |                     |                                                                 |    |
| 8  |                      |                     |                                                                 |    |
| 9  |                      |                     |                                                                 |    |
| 10 | Background /         | <a href="#">#2</a>  | Explain the scientific background and rationale for the         | 4  |
| 11 | rationale            |                     | investigation being reported                                    |    |
| 12 |                      |                     |                                                                 |    |
| 13 |                      |                     |                                                                 |    |
| 14 |                      |                     |                                                                 |    |
| 15 | Objectives           | <a href="#">#3</a>  | State specific objectives, including any prespecified           | 4  |
| 16 |                      |                     | hypotheses                                                      |    |
| 17 |                      |                     |                                                                 |    |
| 18 |                      |                     |                                                                 |    |
| 19 |                      |                     |                                                                 |    |
| 20 | <b>Methods</b>       |                     |                                                                 |    |
| 21 |                      |                     |                                                                 |    |
| 22 |                      |                     |                                                                 |    |
| 23 | Study design         | <a href="#">#4</a>  | Present key elements of study design early in the paper         | 5  |
| 24 |                      |                     |                                                                 |    |
| 25 |                      |                     |                                                                 |    |
| 26 | Setting              | <a href="#">#5</a>  | Describe the setting, locations, and relevant dates, including  | 5  |
| 27 |                      |                     | periods of recruitment, exposure, follow-up, and data           |    |
| 28 |                      |                     | collection                                                      |    |
| 29 |                      |                     |                                                                 |    |
| 30 |                      |                     |                                                                 |    |
| 31 |                      |                     |                                                                 |    |
| 32 |                      |                     |                                                                 |    |
| 33 |                      |                     |                                                                 |    |
| 34 | Eligibility criteria | <a href="#">#6a</a> | Give the eligibility criteria, and the sources and methods of   | 5  |
| 35 |                      |                     | selection of participants. Describe methods of follow-up.       |    |
| 36 |                      |                     |                                                                 |    |
| 37 |                      |                     |                                                                 |    |
| 38 |                      |                     |                                                                 |    |
| 39 | Eligibility criteria | <a href="#">#6b</a> | For matched studies, give matching criteria and number of       | na |
| 40 |                      |                     | exposed and unexposed                                           |    |
| 41 |                      |                     |                                                                 |    |
| 42 |                      |                     |                                                                 |    |
| 43 |                      |                     |                                                                 |    |
| 44 |                      |                     |                                                                 |    |
| 45 | Variables            | <a href="#">#7</a>  | Clearly define all outcomes, exposures, predictors, potential   | 5  |
| 46 |                      |                     | confounders, and effect modifiers. Give diagnostic criteria, if |    |
| 47 |                      |                     | applicable                                                      |    |
| 48 |                      |                     |                                                                 |    |
| 49 |                      |                     |                                                                 |    |
| 50 |                      |                     |                                                                 |    |
| 51 |                      |                     |                                                                 |    |
| 52 |                      |                     |                                                                 |    |
| 53 | Data sources /       | <a href="#">#8</a>  | For each variable of interest give sources of data and details  | 5  |
| 54 | measurement          |                     | of methods of assessment (measurement). Describe                |    |
| 55 |                      |                     | comparability of assessment methods if there is more than       |    |
| 56 |                      |                     |                                                                 |    |
| 57 |                      |                     |                                                                 |    |
| 58 |                      |                     |                                                                 |    |
| 59 |                      |                     |                                                                 |    |
| 60 |                      |                     |                                                                 |    |



one group. Give information separately for for exposed and unexposed groups if applicable.

|    |                |                      |                                                               |    |
|----|----------------|----------------------|---------------------------------------------------------------|----|
| 1  |                |                      |                                                               |    |
| 2  |                |                      |                                                               |    |
| 3  |                |                      |                                                               |    |
| 4  |                |                      |                                                               |    |
| 5  |                |                      |                                                               |    |
| 6  | Bias           | <a href="#">#9</a>   | Describe any efforts to address potential sources of bias     | 6  |
| 7  |                |                      |                                                               |    |
| 8  |                |                      |                                                               |    |
| 9  | Study size     | <a href="#">#10</a>  | Explain how the study size was arrived at                     | 5  |
| 10 |                |                      |                                                               |    |
| 11 |                |                      |                                                               |    |
| 12 | Quantitative   | <a href="#">#11</a>  | Explain how quantitative variables were handled in the        | 6  |
| 13 |                |                      |                                                               |    |
| 14 | variables      |                      | analyses. If applicable, describe which groupings were        |    |
| 15 |                |                      |                                                               |    |
| 16 |                |                      |                                                               |    |
| 17 |                |                      | chosen, and why                                               |    |
| 18 |                |                      |                                                               |    |
| 19 |                |                      |                                                               |    |
| 20 | Statistical    | <a href="#">#12a</a> | Describe all statistical methods, including those used to     | 6  |
| 21 |                |                      |                                                               |    |
| 22 | methods        |                      | control for confounding                                       |    |
| 23 |                |                      |                                                               |    |
| 24 |                |                      |                                                               |    |
| 25 | Statistical    | <a href="#">#12b</a> | Describe any methods used to examine subgroups and            | na |
| 26 |                |                      |                                                               |    |
| 27 | methods        |                      | interactions                                                  |    |
| 28 |                |                      |                                                               |    |
| 29 |                |                      |                                                               |    |
| 30 | Statistical    | <a href="#">#12c</a> | Explain how missing data were addressed                       | 7  |
| 31 |                |                      |                                                               |    |
| 32 | methods        |                      |                                                               |    |
| 33 |                |                      |                                                               |    |
| 34 |                |                      |                                                               |    |
| 35 |                |                      |                                                               |    |
| 36 | Statistical    | <a href="#">#12d</a> | If applicable, explain how loss to follow-up was addressed    | na |
| 37 |                |                      |                                                               |    |
| 38 | methods        |                      |                                                               |    |
| 39 |                |                      |                                                               |    |
| 40 |                |                      |                                                               |    |
| 41 | Statistical    | <a href="#">#12e</a> | Describe any sensitivity analyses                             | na |
| 42 |                |                      |                                                               |    |
| 43 | methods        |                      |                                                               |    |
| 44 |                |                      |                                                               |    |
| 45 |                |                      |                                                               |    |
| 46 | <b>Results</b> |                      |                                                               |    |
| 47 |                |                      |                                                               |    |
| 48 |                |                      |                                                               |    |
| 49 | Participants   | <a href="#">#13a</a> | Report numbers of individuals at each stage of study—eg       | 7  |
| 50 |                |                      |                                                               |    |
| 51 |                |                      | numbers potentially eligible, examined for eligibility,       |    |
| 52 |                |                      |                                                               |    |
| 53 |                |                      | confirmed eligible, included in the study, completing follow- |    |
| 54 |                |                      |                                                               |    |
| 55 |                |                      |                                                               |    |
| 56 |                |                      |                                                               |    |
| 57 |                |                      |                                                               |    |
| 58 |                |                      |                                                               |    |
| 59 |                |                      |                                                               |    |
| 60 |                |                      |                                                               |    |

up, and analysed. Give information separately for for  
exposed and unexposed groups if applicable.

|    |                  |                      |                                                                      |
|----|------------------|----------------------|----------------------------------------------------------------------|
| 1  |                  |                      |                                                                      |
| 2  |                  |                      |                                                                      |
| 3  |                  |                      |                                                                      |
| 4  |                  |                      |                                                                      |
| 5  |                  |                      |                                                                      |
| 6  | Participants     | <a href="#">#13b</a> | Give reasons for non-participation at each stage 7                   |
| 7  |                  |                      |                                                                      |
| 8  |                  |                      |                                                                      |
| 9  | Participants     | <a href="#">#13c</a> | Consider use of a flow diagram na                                    |
| 10 |                  |                      |                                                                      |
| 11 |                  |                      |                                                                      |
| 12 | Descriptive data | <a href="#">#14a</a> | Give characteristics of study participants (eg demographic, 7        |
| 13 |                  |                      |                                                                      |
| 14 |                  |                      | clinical, social) and information on exposures and potential         |
| 15 |                  |                      | confounders. Give information separately for exposed and             |
| 16 |                  |                      | unexposed groups if applicable.                                      |
| 17 |                  |                      |                                                                      |
| 18 |                  |                      |                                                                      |
| 19 |                  |                      |                                                                      |
| 20 |                  |                      |                                                                      |
| 21 |                  |                      |                                                                      |
| 22 | Descriptive data | <a href="#">#14b</a> | Indicate number of participants with missing data for each 7         |
| 23 |                  |                      |                                                                      |
| 24 |                  |                      | variable of interest                                                 |
| 25 |                  |                      |                                                                      |
| 26 |                  |                      |                                                                      |
| 27 | Descriptive data | <a href="#">#14c</a> | Summarise follow-up time (eg, average and total amount) na           |
| 28 |                  |                      |                                                                      |
| 29 |                  |                      |                                                                      |
| 30 | Outcome data     | <a href="#">#15</a>  | Report numbers of outcome events or summary measures na              |
| 31 |                  |                      |                                                                      |
| 32 |                  |                      | over time. Give information separately for exposed and               |
| 33 |                  |                      | unexposed groups if applicable.                                      |
| 34 |                  |                      |                                                                      |
| 35 |                  |                      |                                                                      |
| 36 |                  |                      |                                                                      |
| 37 |                  |                      |                                                                      |
| 38 | Main results     | <a href="#">#16a</a> | Give unadjusted estimates and, if applicable, confounder- 7-8        |
| 39 |                  |                      |                                                                      |
| 40 |                  |                      | adjusted estimates and their precision (eg, 95% confidence           |
| 41 |                  |                      | interval). Make clear which confounders were adjusted for            |
| 42 |                  |                      | and why they were included                                           |
| 43 |                  |                      |                                                                      |
| 44 |                  |                      |                                                                      |
| 45 |                  |                      |                                                                      |
| 46 |                  |                      |                                                                      |
| 47 |                  |                      |                                                                      |
| 48 | Main results     | <a href="#">#16b</a> | Report category boundaries when continuous variables were na         |
| 49 |                  |                      |                                                                      |
| 50 |                  |                      | categorized                                                          |
| 51 |                  |                      |                                                                      |
| 52 |                  |                      |                                                                      |
| 53 | Main results     | <a href="#">#16c</a> | If relevant, consider translating estimates of relative risk into na |
| 54 |                  |                      |                                                                      |
| 55 |                  |                      | absolute risk for a meaningful time period                           |
| 56 |                  |                      |                                                                      |
| 57 |                  |                      |                                                                      |
| 58 |                  |                      |                                                                      |
| 59 |                  |                      |                                                                      |
| 60 |                  |                      |                                                                      |

|    |                          |                     |                                                                |     |
|----|--------------------------|---------------------|----------------------------------------------------------------|-----|
| 1  | Other analyses           | <a href="#">#17</a> | Report other analyses done—e.g., analyses of subgroups         | na  |
| 2  |                          |                     |                                                                |     |
| 3  |                          |                     | and interactions, and sensitivity analyses                     |     |
| 4  |                          |                     |                                                                |     |
| 5  |                          |                     |                                                                |     |
| 6  | <b>Discussion</b>        |                     |                                                                |     |
| 7  |                          |                     |                                                                |     |
| 8  |                          |                     |                                                                |     |
| 9  |                          |                     |                                                                |     |
| 10 | Key results              | <a href="#">#18</a> | Summarise key results with reference to study objectives       | 8-9 |
| 11 |                          |                     |                                                                |     |
| 12 |                          |                     |                                                                |     |
| 13 | Limitations              | <a href="#">#19</a> | Discuss limitations of the study, taking into account sources  | 10  |
| 14 |                          |                     |                                                                |     |
| 15 |                          |                     | of potential bias or imprecision. Discuss both direction and   |     |
| 16 |                          |                     |                                                                |     |
| 17 |                          |                     | magnitude of any potential bias.                               |     |
| 18 |                          |                     |                                                                |     |
| 19 |                          |                     |                                                                |     |
| 20 | Interpretation           | <a href="#">#20</a> | Give a cautious overall interpretation considering objectives, | 10  |
| 21 |                          |                     |                                                                |     |
| 22 |                          |                     | limitations, multiplicity of analyses, results from similar    |     |
| 23 |                          |                     |                                                                |     |
| 24 |                          |                     | studies, and other relevant evidence.                          |     |
| 25 |                          |                     |                                                                |     |
| 26 |                          |                     |                                                                |     |
| 27 |                          |                     |                                                                |     |
| 28 | Generalisability         | <a href="#">#21</a> | Discuss the generalisability (external validity) of the study  | 10  |
| 29 |                          |                     |                                                                |     |
| 30 |                          |                     | results                                                        |     |
| 31 |                          |                     |                                                                |     |
| 32 |                          |                     |                                                                |     |
| 33 | <b>Other Information</b> |                     |                                                                |     |
| 34 |                          |                     |                                                                |     |
| 35 |                          |                     |                                                                |     |
| 36 |                          |                     |                                                                |     |
| 37 | Funding                  | <a href="#">#22</a> | Give the source of funding and the role of the funders for the | 10  |
| 38 |                          |                     |                                                                |     |
| 39 |                          |                     | present study and, if applicable, for the original study on    |     |
| 40 |                          |                     |                                                                |     |
| 41 |                          |                     | which the present article is based                             |     |
| 42 |                          |                     |                                                                |     |
| 43 |                          |                     |                                                                |     |

The STROBE checklist is distributed under the terms of the Creative Commons Attribution License CC-BY. This checklist was completed on 16. August 2019 using <https://www.goodreports.org/>, a tool made by the [EQUATOR Network](#) in collaboration with [Penelope.ai](#)
