# Supplementary material for: Sociodemographic predictors of early postnatal growth: evidence from a Chilean infancy cohort
Source: PubMed Central journal article supplement — BMJ Open. 2020 Jun 3;10(6):e033695. doi: 10.1136/bmjopen-2019-033695 (PMC7282289; doi:10.1136/bmjopen-2019-033695), 2020-06-03
Supplement: bmjopen-2019-033695supp001.pdf [file bmjopen-2019-033695supp001.pdf]

Appendix Table 1. Description of items used for Graffar index

| Graffar item                                      | Scale                                  | n(%)        |
|---------------------------------------------------|----------------------------------------|-------------|
| N                                                 |                                        | 1412        |
| No. people in hh 'eating from 1 pot' (%)          | 1: 1-3                                 | 230 (16.3)  |
|                                                   | 2: 4-6                                 | 865 (61.3)  |
|                                                   | 3: 7-9                                 | 254 (18.0)  |
|                                                   | 4: 10-12                               | 55 ( 3.9)   |
|                                                   | 5: 13-15                               | 6 ( 0.4)    |
|                                                   | 6: over 16                             | 2 ( 0.1)    |
| Father's presence in household (%)                | 1: father is present; not left hh      | 1197 (84.8) |
|                                                   | 3: left hh but sends money             | 66 ( 4.7)   |
|                                                   | 4: partially left hh                   | 38 ( 2.7)   |
|                                                   | 6: completely gone                     | 111 ( 7.9)  |
| Head of household's highest educational level (%) | 1: university completed                | 12 ( 0.9)   |
|                                                   | 2: university not completed            | 9 ( 0.6)    |
|                                                   | 3: h.s. or technical studies completed | 325 (23.0)  |
|                                                   | 4: completed 8th grade                 | 664 (47.1)  |
|                                                   | 5: did not reach 8th grade             | 382 (27.1)  |
|                                                   | 6: no schooling                        | 19 ( 1.3)   |
| Property ownership (%)                            | 1: owned                               | 269 (19.1)  |
|                                                   | 2: home mortgage                       | 83 ( 5.9)   |
|                                                   | 3: rent                                | 243 (17.2)  |
|                                                   | 4: given to you as a gift              | 117 ( 8.3)  |
|                                                   | 5: squatters w tents or construction   | 7 ( 0.5)    |
|                                                   | 6: living in back of main house        | 693 (49.1)  |
| Type of house construction (%)                    | 1: very large house                    | 15 ( 1.1)   |
|                                                   | 2: smaller house                       | 181 (12.8)  |
|                                                   | 3: tiny concrete house                 | 330 (23.4)  |

Appendix Table 1. Description of items used for Graffar index

| Graffar item                                                                                 | Scale                                    | n(%)        |
|----------------------------------------------------------------------------------------------|------------------------------------------|-------------|
|                                                                                              | 4: self-constructed home                 | 398 (28.2)  |
|                                                                                              | 5: wooden house                          | 94 ( 6.7)   |
|                                                                                              | 6: wooden house w/ less than three rooms | 394 (27.9)  |
| Characteristics of the kitchen (%)                                                           | 1: independent kitchen in one room       | 931 (65.9)  |
|                                                                                              | 6: kitchen in a room with multiple uses  | 481 (34.1)  |
| Sewage,plumbing (%)                                                                          | 1: inside plumbing                       | 1402 (99.3) |
|                                                                                              | 5: out house                             | 9 ( 0.6)    |
|                                                                                              | 6: just go in woods                      | 1 ( 0.1)    |
| Water (%)                                                                                    | 1: water from inside home faucet         | 949 (67.2)  |
|                                                                                              | 6: water from outside faucet             | 463 (32.8)  |
| No. times garbage collected per week (%)                                                     | 1: more than 4x/week                     | 6 ( 0.4)    |
|                                                                                              | 2: 3 times/week                          | 1288 (91.2) |
|                                                                                              | 3: 2 times/week                          | 117 ( 8.3)  |
|                                                                                              | 6: never                                 | 1 ( 0.1)    |
| Total count of previous six goods,possession (tv, washing machine, stereo, refrig., car) (%) | 1: 13-15 (own all six goods)             | 77 ( 5.5)   |
|                                                                                              | 2: 10-12                                 | 311 (22.3)  |
|                                                                                              | 3: 7-9                                   | 302 (21.6)  |
|                                                                                              | 4: 4-6                                   | 277 (19.9)  |
|                                                                                              | 5: 1-3                                   | 374 (26.8)  |
|                                                                                              | 6: 0                                     | 54 ( 3.9)   |

Appendix Table 2: Nonlinear mixed effects model fit evaluation: BIC for all evaluated models

| Trajectory type | Model ID          | Model description                                          | BIC <sup>a</sup> |
|-----------------|-------------------|------------------------------------------------------------|------------------|
|                 | no random effects | no random effects                                          | NA               |
|                 | m2                | random size (alpha0)                                       | -19546.4         |
|                 | m3                | random tempo (beta0)                                       | -17232           |
|                 | m4                | random velocity (beta1)                                    | -18323           |
|                 | m5                | random tempo and velocity (beta0 and beta1)                | -21901.5         |
|                 | m5.strat          | m5 + sex-spec effects                                      | -22123.4         |
|                 | m5.strat2         | m5.strat + sex-spec corr structure                         | -22107.5         |
|                 | m6                | random size and tempo (alpha0 and beta0)                   | -21740.4         |
|                 | m7                | random size and velocity (alpha0 and beta1)                | -21629.8         |
| Weight          | m8                | random size, tempo and velocity (alpha0, beta0, and beta1) | <b>-22940.66</b> |
|                 | no random effects | no random effects                                          | NA               |
|                 | m2                | random size (alpha0)                                       | -37399.5         |
|                 | m3                | random tempo (beta0)                                       | -36684.1         |
|                 | m4                | random velocity (beta1)                                    | -34985.7         |
|                 | m5                | random tempo and velocity (beta0 and beta1)                | -37820           |
|                 | m5.strat          | m5 + sex-spec effects                                      | <b>-38000.74</b> |
|                 | m5.strat2         | m5.strat + sex-spec corr structure                         | -37978.2         |
|                 | m6                | random size and tempo (alpha0 and beta0)                   | -37381.5         |
| Height          | m7                | random size and velocity (alpha0 and beta1)                | -37819.9         |
|                 | no random effects | no random effects                                          | NA               |
|                 | m2                | random size (alpha0)                                       | -21147.2         |
|                 | m3                | random tempo (beta0)                                       | -18852.1         |
|                 | m4                | random velocity (beta1)                                    | -20549.9         |
|                 | m5                | random tempo and velocity (beta0 and beta1)                | -22598           |
|                 | m5.strat          | m5 + sex-spec effects                                      | -22761.2         |
|                 | m5.strat2         | m5.strat + sex-spec corr structure                         | -22751.3         |
|                 | m6                | random size and tempo (alpha0 and beta0)                   | <b>-22808.5</b>  |
| WFL             | m7                | random size and velocity (alpha0 and beta1)                | -22484.6         |

<sup>a</sup>Bold values indicate lowest value within a trajectory evaluation.
